# Supplementary material for: Identification of tryptophan metabolism- and immune-related genes signature and prediction of immune infiltration landscape in bladder urothelial carcinoma
Source: Frontiers journal article supplement (doi:10.3389/fimmu.2023.1283792), 2023-10-26
Supplement: Data_Sheet_1.ZIP [file Data_Sheet_1.ZIP]

## Sheet: Sheet1
Position	Sample Name	Gene Name	Cq	Concentration	Call	Excluded	Sample Type	Standard	Cq Mean	Cq Error	Concentration Mean	Concentration Error	Replicate Group	Dye	Edited Call	Slope	EPF	Failure	Notes	Sample Prep Notes	Number
A1	Sample 1	None	19.82	-	Positive	Unchecked	Unknown	-	19.82	0	-	-		SYBR Green I		2.36	5.79	None			1
A2	Sample 2	None	19.87	-	Positive	Unchecked	Unknown	-	19.87	0	-	-		SYBR Green I		2.4	5.79	None			2
A3	Sample 3	None	19.94	-	Positive	Unchecked	Unknown	-	19.94	0	-	-		SYBR Green I		2.55	5.94	None			3
A4	Sample 4	None	14.83	-	Positive	Unchecked	Unknown	-	14.83	0	-	-		SYBR Green I		2.11	5.65	None			4
A5	Sample 5	None	14.93	-	Positive	Unchecked	Unknown	-	14.93	0	-	-		SYBR Green I		2.18	5.73	None			5
A6	Sample 6	None	15	-	Positive	Unchecked	Unknown	-	15	0	-	-		SYBR Green I		2.25	5.82	None			6
A7	Sample 7	None	18.74	-	Positive	Unchecked	Unknown	-	18.74	0	-	-		SYBR Green I		2.11	5.46	None			7
A8	Sample 8	None	18.77	-	Positive	Unchecked	Unknown	-	18.77	0	-	-		SYBR Green I		2.16	5.49	None			8
A9	Sample 9	None	18.83	-	Positive	Unchecked	Unknown	-	18.83	0	-	-		SYBR Green I		2.17	5.53	None			9
A10	Sample 10	None	14.74	-	Positive	Unchecked	Unknown	-	14.74	0	-	-		SYBR Green I		1.79	5.25	None			10
A11	Sample 11	None	14.84	-	Positive	Unchecked	Unknown	-	14.84	0	-	-		SYBR Green I		1.91	5.37	None			11
A12	Sample 12	None	14.8	-	Positive	Unchecked	Unknown	-	14.8	0	-	-		SYBR Green I		1.85	5.29	None			12
B1	Sample 13	None	20.03	-	Positive	Unchecked	Unknown	-	20.03	0	-	-		SYBR Green I		1.92	5.22	None			13
B2	Sample 14	None	20.06	-	Positive	Unchecked	Unknown	-	20.06	0	-	-		SYBR Green I		1.9	5.19	None			14
B3	Sample 15	None	19.9	-	Positive	Unchecked	Unknown	-	19.9	0	-	-		SYBR Green I		1.8	5.06	None			15
B4	Sample 16	None	14.45	-	Positive	Unchecked	Unknown	-	14.45	0	-	-		SYBR Green I		1.73	5.16	None			16
B5	Sample 17	None	14.3	-	Positive	Unchecked	Unknown	-	14.3	0	-	-		SYBR Green I		1.63	5	None			17
B6	Sample 18	None	14.16	-	Positive	Unchecked	Unknown	-	14.16	0	-	-		SYBR Green I		1.53	4.85	None			18
B7	Sample 19	None	19.13	-	Positive	Unchecked	Unknown	-	19.13	0	-	-		SYBR Green I		1.9	5.21	None			19
B8	Sample 20	None	19.16	-	Positive	Unchecked	Unknown	-	19.16	0	-	-		SYBR Green I		1.99	5.32	None			20
B9	Sample 21	None	19.18	-	Positive	Unchecked	Unknown	-	19.18	0	-	-		SYBR Green I		1.97	5.29	None			21
B10	Sample 22	None	14.58	-	Positive	Unchecked	Unknown	-	14.58	0	-	-		SYBR Green I		1.76	5.21	None			22
B11	Sample 23	None	14.46	-	Positive	Unchecked	Unknown	-	14.46	0	-	-		SYBR Green I		1.68	5.08	None			23
B12	Sample 24	None	14.51	-	Positive	Unchecked	Unknown	-	14.51	0	-	-		SYBR Green I		1.75	5.17	None			24
C1	Sample 25	None	20.06	-	Positive	Unchecked	Unknown	-	20.06	0	-	-		SYBR Green I		2	5.32	None			25
C2	Sample 26	None	20.09	-	Positive	Unchecked	Unknown	-	20.09	0	-	-		SYBR Green I		1.99	5.31	None			26
C3	Sample 27	None	20.07	-	Positive	Unchecked	Unknown	-	20.07	0	-	-		SYBR Green I		1.82	5.09	None			27
C4	Sample 28	None	14.41	-	Positive	Unchecked	Unknown	-	14.41	0	-	-		SYBR Green I		1.78	5.23	None			28
C5	Sample 29	None	14.35	-	Positive	Unchecked	Unknown	-	14.35	0	-	-		SYBR Green I		1.72	5.13	None			29
C6	Sample 30	None	14.35	-	Positive	Unchecked	Unknown	-	14.35	0	-	-		SYBR Green I		1.65	5.03	None			30
C7	Sample 31	None	19.19	-	Positive	Unchecked	Unknown	-	19.19	0	-	-		SYBR Green I		1.89	5.18	None			31
C8	Sample 32	None	19.17	-	Positive	Unchecked	Unknown	-	19.17	0	-	-		SYBR Green I		1.86	5.15	None			32
C9	Sample 33	None	19.16	-	Positive	Unchecked	Unknown	-	19.16	0	-	-		SYBR Green I		1.84	5.12	None			33
C10	Sample 34	None	14.61	-	Positive	Unchecked	Unknown	-	14.61	0	-	-		SYBR Green I		1.66	5.02	None			34
C11	Sample 35	None	14.52	-	Positive	Unchecked	Unknown	-	14.52	0	-	-		SYBR Green I		1.6	4.91	None			35
C12	Sample 36	None	14.49	-	Positive	Unchecked	Unknown	-	14.49	0	-	-		SYBR Green I		1.51	4.78	None			36
D1	Sample 37	None	19.18	-	Positive	Unchecked	Unknown	-	19.18	0	-	-		SYBR Green I		1.94	5.26	None			37
D2	Sample 38	None	19.21	-	Positive	Unchecked	Unknown	-	19.21	0	-	-		SYBR Green I		1.9	5.19	None			38
D3	Sample 39	None	19.24	-	Positive	Unchecked	Unknown	-	19.24	0	-	-		SYBR Green I		1.86	5.14	None			39
D4	Sample 40	None	14.63	-	Positive	Unchecked	Unknown	-	14.63	0	-	-		SYBR Green I		1.69	5.1	None			40
D5	Sample 41	None	14.64	-	Positive	Unchecked	Unknown	-	14.64	0	-	-		SYBR Green I		1.64	5.01	None			41
D6	Sample 42	None	14.65	-	Positive	Unchecked	Unknown	-	14.65	0	-	-		SYBR Green I		1.72	5.12	None			42
D7	Sample 43	None	19.83	-	Positive	Unchecked	Unknown	-	19.83	0	-	-		SYBR Green I		2.31	5.71	None			43
D8	Sample 44	None	19.84	-	Positive	Unchecked	Unknown	-	19.84	0	-	-		SYBR Green I		2.44	5.83	None			44
D9	Sample 45	None	19.81	-	Positive	Unchecked	Unknown	-	19.81	0	-	-		SYBR Green I		2.31	5.71	None			45
D10	Sample 46	None	14.88	-	Positive	Unchecked	Unknown	-	14.88	0	-	-		SYBR Green I		2.15	5.69	None			46
D11	Sample 47	None	14.83	-	Positive	Unchecked	Unknown	-	14.83	0	-	-		SYBR Green I		1.87	5.4	None			47
D12	Sample 48	None	14.94	-	Positive	Unchecked	Unknown	-	14.94	0	-	-		SYBR Green I		1.88	5.4	None			48
E1	Sample 49	None	19.94	-	Positive	Unchecked	Unknown	-	19.94	0	-	-		SYBR Green I		1.87	5.15	None			49
E2	Sample 50	None	20.06	-	Positive	Unchecked	Unknown	-	20.06	0	-	-		SYBR Green I		1.93	5.2	None			50
E3	Sample 51	None	19.99	-	Positive	Unchecked	Unknown	-	19.99	0	-	-		SYBR Green I		1.84	5.1	None			51
E4	Sample 52	None	14.32	-	Positive	Unchecked	Unknown	-	14.32	0	-	-		SYBR Green I		1.71	5.11	None			52
E5	Sample 53	None	14.28	-	Positive	Unchecked	Unknown	-	14.28	0	-	-		SYBR Green I		1.67	5.08	None			53
E6	Sample 54	None	14.16	-	Positive	Unchecked	Unknown	-	14.16	0	-	-		SYBR Green I		1.51	4.81	None			54
E7	Sample 55	None	19.94	-	Positive	Unchecked	Unknown	-	19.94	0	-	-		SYBR Green I		1.86	5.13	None			55
E8	Sample 56	None	19.87	-	Positive	Unchecked	Unknown	-	19.87	0	-	-		SYBR Green I		1.7	4.9	None			56
E9	Sample 57	None	19.98	-	Positive	Unchecked	Unknown	-	19.98	0	-	-		SYBR Green I		1.79	5.04	None			57
E10	Sample 58	None	14.14	-	Positive	Unchecked	Unknown	-	14.14	0	-	-		SYBR Green I		1.51	4.79	None			58
E11	Sample 59	None	14.21	-	Positive	Unchecked	Unknown	-	14.21	0	-	-		SYBR Green I		1.47	4.75	None			59
E12	Sample 60	None	14.22	-	Positive	Unchecked	Unknown	-	14.22	0	-	-		SYBR Green I		1.53	4.84	None			60
F1	Sample 61	None	19.84	-	Positive	Unchecked	Unknown	-	19.84	0	-	-		SYBR Green I		2.54	5.92	None			61
F2	Sample 62	None	19.87	-	Positive	Unchecked	Unknown	-	19.87	0	-	-		SYBR Green I		2.56	5.92	None			62
F3	Sample 63	None	19.83	-	Positive	Unchecked	Unknown	-	19.83	0	-	-		SYBR Green I		2.48	5.86	None			63
F4	Sample 64	None	14.92	-	Positive	Unchecked	Unknown	-	14.92	0	-	-		SYBR Green I		2.17	5.75	None			64
F5	Sample 65	None	14.93	-	Positive	Unchecked	Unknown	-	14.93	0	-	-		SYBR Green I		2.12	5.68	None			65
F6	Sample 66	None	14.93	-	Positive	Unchecked	Unknown	-	14.93	0	-	-		SYBR Green I		2.12	5.7	None			66
F7	Sample 67	None	19.88	-	Positive	Unchecked	Unknown	-	19.88	0	-	-		SYBR Green I		1.76	5	None			67
F8	Sample 68	None	19.92	-	Positive	Unchecked	Unknown	-	19.92	0	-	-		SYBR Green I		1.74	4.97	None			68
F9	Sample 69	None	19.88	-	Positive	Unchecked	Unknown	-	19.88	0	-	-		SYBR Green I		1.69	4.89	None			69
F10	Sample 70	None	14.24	-	Positive	Unchecked	Unknown	-	14.24	0	-	-		SYBR Green I		1.58	4.93	None			70
F11	Sample 71	None	14.25	-	Positive	Unchecked	Unknown	-	14.25	0	-	-		SYBR Green I		1.53	4.84	None			71
F12	Sample 72	None	14.11	-	Positive	Unchecked	Unknown	-	14.11	0	-	-		SYBR Green I		1.37	4.56	None			72
G1	Sample 73	None	-	-	Negative	Unchecked	Unknown	-	-	-	-	-		SYBR Green I		0	-0.05	None			73
G2	Sample 74	None	-	-	Negative	Unchecked	Unknown	-	-	-	-	-		SYBR Green I		0.02	0.23	None			74
G3	Sample 75	None	-	-	Negative	Unchecked	Unknown	-	-	-	-	-		SYBR Green I		0.01	0.19	None			75
G4	Sample 76	None	-	-	Negative	Unchecked	Unknown	-	-	-	-	-		SYBR Green I		0.02	-0.02	None			76
G5	Sample 77	None	-	-	Negative	Unchecked	Unknown	-	-	-	-	-		SYBR Green I		0.01	-0.02	None			77
G6	Sample 78	None	-	-	Negative	Unchecked	Unknown	-	-	-	-	-		SYBR Green I		0.01	-0.05	None			78
G7	Sample 79	None	-	-	Negative	Unchecked	Unknown	-	-	-	-	-		SYBR Green I		0.01	0.01	None			79
G8	Sample 80	None	-	-	Negative	Unchecked	Unknown	-	-	-	-	-		SYBR Green I		0.01	0.09	None			80
G9	Sample 81	None	-	-	Negative	Unchecked	Unknown	-	-	-	-	-		SYBR Green I		0.02	0.15	None			81
G10	Sample 82	None	-	-	Negative	Unchecked	Unknown	-	-	-	-	-		SYBR Green I		0.01	-0.01	None			82
G11	Sample 83	None	-	-	Negative	Unchecked	Unknown	-	-	-	-	-		SYBR Green I		0.01	-0.03	None			83
G12	Sample 84	None	-	-	Negative	Unchecked	Unknown	-	-	-	-	-		SYBR Green I		0.01	-0.05	None			84
H1	Sample 85	None	-	-	Negative	Unchecked	Unknown	-	-	-	-	-		SYBR Green I		0	-0.06	None			85
H2	Sample 86	None	-	-	Negative	Unchecked	Unknown	-	-	-	-	-		SYBR Green I		0.02	0.17	None			86
H3	Sample 87	None	-	-	Negative	Unchecked	Unknown	-	-	-	-	-		SYBR Green I		0.03	0.25	None			87
H4	Sample 88	None	-	-	Negative	Unchecked	Unknown	-	-	-	-	-		SYBR Green I		0.02	0.2	None			88
H5	Sample 89	None	-	-	Negative	Unchecked	Unknown	-	-	-	-	-		SYBR Green I		0.01	0.18	None			89
H6	Sample 90	None	-	-	Negative	Unchecked	Unknown	-	-	-	-	-		SYBR Green I		0.04	0.31	None			90
H7	Sample 91	None	-	-	Negative	Unchecked	Unknown	-	-	-	-	-		SYBR Green I		0.03	0.21	None			91
H8	Sample 92	None	-	-	Negative	Unchecked	Unknown	-	-	-	-	-		SYBR Green I		0.01	-0.03	None			92
H9	Sample 93	None	-	-	Negative	Unchecked	Unknown	-	-	-	-	-		SYBR Green I		0	0.12	None			93
H10	Sample 94	None	-	-	Negative	Unchecked	Unknown	-	-	-	-	-		SYBR Green I		0	0.14	None			94
H11	Sample 95	None	-	-	Negative	Unchecked	Unknown	-	-	-	-	-		SYBR Green I		0.01	0.05	None			95
H12	Sample 96	None	-	-	Negative	Unchecked	Unknown	-	-	-	-	-		SYBR Green I		0.01	-0.04	None			96

## Sheet: Sheet2
	1	2	3	4	5	6	7	8	9	10	11	12
A	19.82	19.87	19.94	14.83	14.93	15	18.74	18.77	18.83	14.74	14.84	14.8
B	20.03	20.06	19.9	14.45	14.3	14.16	19.13	19.16	19.18	14.58	14.46	14.51
C	20.06	20.09	20.07	14.41	14.35	14.35	19.19	19.17	19.16	14.61	14.52	14.49
D	19.18	19.21	19.24	14.63	14.64	14.65	19.83	19.84	19.81	14.88	14.83	14.94
E	19.94	20.06	19.99	14.32	14.28	14.16	19.94	19.87	19.98	14.14	14.21	14.22
F	19.84	19.87	19.83	14.92	14.93	14.93	19.88	19.92	19.88	14.24	14.25	14.11
G
H
NC	19.84	19.87	19.83	14.9267			18.74	18.77	18.83	14.7933
sh1	20.03	20.06	19.9	14.3033			19.19	19.17	19.16	14.54
sh2	20.06	20.09	20.07	14.37			19.83	19.84	19.81	14.8833
NC ave		4.91967						3.987
	4.913	4.943	4.903				3.947	3.977	4.037
	5.727	5.757	5.597				4.65	4.63	4.62
	5.69	5.72	5.7				4.947	4.957	4.927
	-0.007	0.023	-0.017				-0.04	-0.01	0.05
	0.807	0.837	0.677				0.663	0.643	0.633
	0.77	0.8	0.78				0.96	0.97	0.94
				P						P
NC	1.00486	0.984184	1.01185				1.02811	1.00696	0.965936
SH1	0.571569	0.559806	0.625465	4.4e-05			0.631564	0.64038	0.644834	4.1e-05
SH2	0.586417	0.574349	0.582367	1e-06			0.514057	0.510506	0.521233	1.3e-05
