# Supplementary material for: Identification of tryptophan metabolism- and immune-related genes signature and prediction of immune infiltration landscape in bladder urothelial carcinoma
Source: Front Immunol. 2023 Oct 26;14:1283792. doi: 10.3389/fimmu.2023.1283792 (PMC10637370; doi:10.3389/fimmu.2023.1283792)
Supplement: Supplementary file 4 [file Table_3.xlsx]

## Sheet: Sheet1
GeneSymbol	baseMean	log2FoldChange	lfcSE	stat	pvalue	padj	change
EPM2A	254.411	-2.73666	0.187246	-14.6153	2.24e-48	8.18e-44	DOWN
SLMAP	3557.74	-2.69382	0.189766	-14.1955	9.77e-46	1.78e-41	DOWN
PLCD4	202.585	-2.9796	0.213417	-13.9614	2.68e-44	3.26e-40	DOWN
LMOD3	19.5453	-3.95829	0.289112	-13.6912	1.15e-42	1.04e-38	DOWN
SMTN	6235.52	-3.33674	0.251478	-13.2685	3.53e-40	2.19e-36	DOWN
CT45A10	19.7838	19.2862	1.45372	13.2668	3.61e-40	2.19e-36	UP
CSRP1	18185.3	-3.42273	0.262056	-13.0611	5.49e-39	2.86e-35	DOWN
ITPKB	2038.42	-2.19143	0.168451	-13.0093	1.08e-38	4.94e-35	DOWN
RAP1A	3559.88	-1.57177	0.120908	-12.9997	1.23e-38	4.98e-35	DOWN
SRF	3560.64	-1.73714	0.134524	-12.9132	3.79e-38	1.31e-34	DOWN
SLC25A25	1169.41	-2.74805	0.212862	-12.91	3.95e-38	1.31e-34	DOWN
PPP1R12A	3439.19	-2.01096	0.15587	-12.9015	4.41e-38	1.34e-34	DOWN
KLHL41	55.5142	-4.89378	0.384397	-12.7311	3.97e-37	1.11e-33	DOWN
DSTN	20298	-2.02682	0.159748	-12.6877	6.92e-37	1.8e-33	DOWN
MYOM1	305.631	-4.61774	0.364376	-12.673	8.34e-37	2.03e-33	DOWN
PPP1R12B	4761.12	-3.99405	0.318954	-12.5223	5.63e-36	1.21e-32	DOWN
CRY2	1298.12	-1.72025	0.137326	-12.5267	5.33e-36	1.21e-32	DOWN
LPP	8159.9	-2.88764	0.231632	-12.4665	1.14e-35	2.3e-32	DOWN
CLEC3B	272.119	-4.47873	0.361899	-12.3756	3.54e-35	6.8e-32	DOWN
SH3BGR	221.014	-2.97568	0.242388	-12.2765	1.21e-34	2.21e-31	DOWN
MBNL1-AS1	332.33	-4.06878	0.331958	-12.2569	1.54e-34	2.68e-31	DOWN
CSRNP1	2378.83	-2.8104	0.230293	-12.2036	2.97e-34	4.93e-31	DOWN
CFL2	1261.78	-3.31592	0.273239	-12.1356	6.84e-34	1.08e-30	DOWN
RASSF3	1927.14	-2.43061	0.200827	-12.103	1.02e-33	1.55e-30	DOWN
C16orf59	480.607	2.65223	0.221344	11.9824	4.4e-33	6.41e-30	UP
pk	3154.47	-3.15371	0.263431	-11.9717	5e-33	7.01e-30	DOWN
TLN1	16140.8	-2.12281	0.177398	-11.9664	5.33e-33	7.19e-30	DOWN
SVIL	6314.07	-3.00644	0.252108	-11.9252	8.75e-33	1.14e-29	DOWN
ESM1	685.124	4.43858	0.373566	11.8816	1.47e-32	1.85e-29	UP
KIF18B	1238.35	2.82031	0.238835	11.8086	3.52e-32	4.28e-29	UP
MEF2D	2704.09	-1.38001	0.116897	-11.8053	3.66e-32	4.31e-29	DOWN
TPM1	14056.5	-3.51394	0.297976	-11.7927	4.26e-32	4.85e-29	DOWN
COL10A1	1176.29	6.82122	0.578774	11.7856	4.63e-32	5.11e-29	UP
PJA2	3376.89	-1.90488	0.161799	-11.7731	5.37e-32	5.76e-29	DOWN
NT5DC3	695.031	-2.83825	0.241666	-11.7445	7.54e-32	7.85e-29	DOWN
TCF21	283.04	-4.28497	0.365649	-11.7188	1.02e-31	1.03e-28	DOWN
NACC2	1384.38	-2.56131	0.219964	-11.6442	2.46e-31	2.42e-28	DOWN
TNS1	10010	-4.35882	0.374807	-11.6295	2.92e-31	2.8e-28	DOWN
FNBP1	2487.19	-2.47369	0.212917	-11.6181	3.34e-31	3.12e-28	DOWN
ABL1	4152.67	-1.69202	0.145777	-11.6069	3.8e-31	3.46e-28	DOWN
PYGM	209.305	-4.73377	0.408136	-11.5985	4.19e-31	3.73e-28	DOWN
FILIP1	423.296	-4.40505	0.381399	-11.5497	7.41e-31	6.43e-28	DOWN
RYR3	95.6987	-3.02643	0.262085	-11.5475	7.6e-31	6.44e-28	DOWN
PCSK7	1379.37	-2.019	0.175885	-11.4791	1.68e-30	1.39e-27	DOWN
MAT2A	6591.29	-1.71355	0.149361	-11.4725	1.81e-30	1.47e-27	DOWN
CBX7	1339.48	-2.50285	0.218441	-11.4578	2.15e-30	1.7e-27	DOWN
FYCO1	2608.38	-2.08226	0.183034	-11.3764	5.48e-30	4.22e-27	DOWN
RP11-6O2.3	54.9137	-4.35669	0.383002	-11.3751	5.56e-30	4.22e-27	DOWN
IQGAP3	2083.83	2.73311	0.240371	11.3704	5.87e-30	4.37e-27	UP
KANK2	4339.49	-2.89196	0.254889	-11.346	7.77e-30	5.66e-27	DOWN
MMP11	8439.35	5.39173	0.47545	11.3403	8.29e-30	5.93e-27	UP
DMPK	2792.42	-2.16643	0.191731	-11.2994	1.32e-29	9.27e-27	DOWN
FAM129A	3737.33	-3.83039	0.33921	-11.2921	1.44e-29	9.88e-27	DOWN
PPAP2B	2643.72	-2.39767	0.212376	-11.2897	1.48e-29	9.96e-27	DOWN
PER2	921.651	-2.2279	0.197739	-11.2669	1.91e-29	1.27e-26	DOWN
EME1	284.282	2.56353	0.227935	11.2468	2.4e-29	1.56e-26	UP
TROAP	1404.7	2.6225	0.235983	11.1131	1.08e-28	6.93e-26	UP
DCUN1D3	771.979	-1.75324	0.157892	-11.1041	1.2e-28	7.53e-26	DOWN
CST1	764.037	6.79833	0.61273	11.0951	1.32e-28	8.18e-26	UP
HDAC4	674.922	-2.14729	0.19452	-11.0389	2.48e-28	1.51e-25	DOWN
HJURP	1141.3	2.47278	0.224153	11.0317	2.69e-28	1.61e-25	UP
USP12	1414.37	-1.58635	0.1441	-11.0087	3.47e-28	2.04e-25	DOWN
XRCC2	396.661	2.3417	0.213278	10.9796	4.79e-28	2.77e-25	UP
UHRF1	1277.55	2.41246	0.221204	10.906	1.08e-27	6.14e-25	UP
POPDC2	409.75	-4.14358	0.380617	-10.8865	1.34e-27	7.49e-25	DOWN
HLF	176.043	-4.72749	0.434303	-10.8852	1.36e-27	7.49e-25	DOWN
CDK1	2731.52	2.28804	0.210779	10.8552	1.88e-27	1.03e-24	UP
GPRASP1	340.608	-3.14142	0.289658	-10.8453	2.1e-27	1.13e-24	DOWN
DMGDH	26.6263	-2.85269	0.263574	-10.8231	2.67e-27	1.41e-24	DOWN
SYNM	7340.12	-5.46151	0.505271	-10.8091	3.12e-27	1.62e-24	DOWN
FBXL22	174.968	-3.56726	0.331224	-10.7699	4.77e-27	2.45e-24	DOWN
DIXDC1	703.994	-3.23022	0.300486	-10.75	5.93e-27	3e-24	DOWN
UBE2C	3985.11	2.59786	0.24179	10.7443	6.3e-27	3.15e-24	UP
MYLK	9475.94	-4.30683	0.401245	-10.7336	7.07e-27	3.49e-24	DOWN
GTSE1	914.561	2.35911	0.220093	10.7187	8.32e-27	4.04e-24	UP
AURKA	1596.22	2.34058	0.218798	10.6975	1.05e-26	5.02e-24	UP
LSM11	476.367	-1.79701	0.168657	-10.6548	1.66e-26	7.84e-24	DOWN
MEN1	2865.41	1.19222	0.112206	10.6252	2.27e-26	1.05e-23	UP
FAM180B	6.26165	-5.14339	0.484087	-10.6249	2.28e-26	1.05e-23	DOWN
CPED1	481.084	-4.00387	0.37694	-10.622	2.35e-26	1.07e-23	DOWN
RAB9B	150.209	-3.64523	0.343248	-10.6198	2.41e-26	1.08e-23	DOWN
AF001548.6	15.6473	-5.42211	0.510715	-10.6167	2.49e-26	1.11e-23	DOWN
EGR1	13571.3	-3.44973	0.325157	-10.6094	2.69e-26	1.18e-23	DOWN
ILK	486.953	-2.14211	0.202335	-10.587	3.43e-26	1.49e-23	DOWN
PALLD	9251.21	-3.19421	0.302482	-10.56	4.57e-26	1.96e-23	DOWN
KIF2C	2229.71	2.33951	0.221571	10.5587	4.63e-26	1.96e-23	UP
RAB23	665.192	-3.0427	0.288687	-10.5398	5.66e-26	2.37e-23	DOWN
C21orf58	582.135	2.43762	0.231296	10.5389	5.71e-26	2.37e-23	UP
SYNPO2	8124.44	-5.16401	0.490996	-10.5174	7.18e-26	2.94e-23	DOWN
STAT5B	3045.04	-1.1634	0.110729	-10.5068	8.04e-26	3.26e-23	DOWN
GSN	23003.8	-2.46281	0.234528	-10.5011	8.53e-26	3.42e-23	DOWN
KCNMA1	772.07	-4.16061	0.399217	-10.4219	1.97e-25	7.8e-23	DOWN
FLNA	70701.1	-3.35025	0.322024	-10.4037	2.38e-25	9.35e-23	DOWN
CDCA8	1529.51	2.31446	0.222504	10.4019	2.43e-25	9.43e-23	UP
ZFP36	16985.5	-2.92544	0.281379	-10.3968	2.56e-25	9.84e-23	DOWN
ITPR1	1324.2	-2.848	0.274017	-10.3935	2.65e-25	1.01e-22	DOWN
ITGB1BP2	84.7995	-2.75966	0.266129	-10.3696	3.41e-25	1.28e-22	DOWN
ZWINT	2365.11	2.18412	0.210725	10.3648	3.58e-25	1.33e-22	UP
STIL	793.492	2.17014	0.209557	10.3558	3.94e-25	1.45e-22	UP
TEAD1	3068.43	-2.04105	0.197146	-10.353	4.06e-25	1.48e-22	DOWN
NR4A1	6554.1	-3.82347	0.369664	-10.3431	4.5e-25	1.62e-22	DOWN
DNAJB4	898.504	-2.25221	0.218137	-10.3247	5.45e-25	1.95e-22	DOWN
RCAN2	746.488	-3.26721	0.316772	-10.3141	6.09e-25	2.15e-22	DOWN
ADAMTS1	4159.16	-3.43284	0.333097	-10.3058	6.63e-25	2.32e-22	DOWN
RCC2	12623.4	1.21978	0.118485	10.2948	7.44e-25	2.58e-22	UP
ARHGAP39	800.394	1.67145	0.162687	10.2741	9.22e-25	3.17e-22	UP
CCDC69	2140.91	-2.82023	0.274799	-10.2629	1.04e-24	3.53e-22	DOWN
HMGB3	4824.61	1.96768	0.191856	10.256	1.11e-24	3.72e-22	UP
FOXN3	2574.82	-1.71618	0.167336	-10.2559	1.11e-24	3.72e-22	DOWN
COL11A1	1796.9	5.76202	0.562711	10.2398	1.32e-24	4.36e-22	UP
FANCA	1061.55	2.07658	0.20309	10.2249	1.53e-24	5.04e-22	UP
LIMS2	1550.78	-3.44414	0.336894	-10.2232	1.56e-24	5.08e-22	DOWN
ACACB	725.582	-2.82249	0.276594	-10.2045	1.89e-24	6.06e-22	DOWN
RP11-617F23.1	182.874	-2.50137	0.245109	-10.2052	1.88e-24	6.06e-22	DOWN
ITGA8	556.613	-3.43981	0.337356	-10.1964	2.06e-24	6.52e-22	DOWN
SLC2A4	253.614	-4.82857	0.473705	-10.1932	2.13e-24	6.68e-22	DOWN
ALDH1B1	2975.9	-2.67411	0.262538	-10.1856	2.3e-24	7.16e-22	DOWN
VCL	9538.4	-1.92876	0.190028	-10.1499	3.32e-24	1.02e-21	DOWN
POLQ	669.971	2.31799	0.228816	10.1304	4.05e-24	1.24e-21	UP
CENPA	548.544	2.60597	0.25727	10.1293	4.09e-24	1.24e-21	UP
FAXDC2	387.85	-2.8448	0.280882	-10.1281	4.15e-24	1.25e-21	DOWN
RP11-1069G10.1	35.114	-4.76303	0.470389	-10.1257	4.25e-24	1.27e-21	DOWN
RP11-404E16.1	3.06953	-4.74018	0.468205	-10.1242	4.32e-24	1.28e-21	DOWN
GLP2R	108.027	-5.37142	0.530634	-10.1226	4.38e-24	1.29e-21	DOWN
CASP2	2706.99	1.17129	0.116149	10.0844	6.48e-24	1.89e-21	UP
LPPR4	151.57	-3.60755	0.358081	-10.0747	7.15e-24	2.07e-21	DOWN
AKAP6	263.253	-3.88722	0.38614	-10.0669	7.74e-24	2.22e-21	DOWN
CGNL1	486.096	-3.30906	0.329381	-10.0463	9.54e-24	2.72e-21	DOWN
LDLRAD2	69.9036	-2.41099	0.240138	-10.04	1.02e-23	2.87e-21	DOWN
TACR2	222.263	-4.42694	0.440992	-10.0386	1.03e-23	2.89e-21	DOWN
ZBTB4	4226.85	-1.31265	0.131057	-10.0159	1.3e-23	3.56e-21	DOWN
PSD	798.926	-3.90645	0.390025	-10.0159	1.3e-23	3.56e-21	DOWN
SVEP1	619.663	-3.14678	0.314174	-10.016	1.3e-23	3.56e-21	DOWN
RNF122	532.037	-2.14829	0.214553	-10.0128	1.34e-23	3.64e-21	DOWN
SDPR	885.963	-3.86045	0.385886	-10.0041	1.46e-23	3.92e-21	DOWN
RAD54L	572.985	2.25642	0.225551	10.004	1.46e-23	3.92e-21	UP
CALD1	13848.9	-3.22489	0.322679	-9.99412	1.62e-23	4.3e-21	DOWN
SORBS1	3879.42	-4.38988	0.439857	-9.98025	1.86e-23	4.91e-21	DOWN
KLHL42	1603.17	-1.60155	0.160509	-9.97796	1.9e-23	4.99e-21	DOWN
ITIH5	1519.69	-3.60815	0.362025	-9.96658	2.13e-23	5.56e-21	DOWN
MXRA7	2953.7	-2.32461	0.233621	-9.95032	2.51e-23	6.5e-21	DOWN
SOBP	267.84	-3.27783	0.330119	-9.92922	3.11e-23	7.98e-21	DOWN
RP11-443B20.1	87.6554	2.13806	0.215493	9.92173	3.35e-23	8.54e-21	UP
ARID5B	3300.88	-2.05449	0.207245	-9.91331	3.64e-23	9.22e-21	DOWN
PKD1	2634.7	-1.58762	0.160536	-9.8895	4.62e-23	1.16e-20	DOWN
FAM72D	68.649	2.70202	0.273267	9.88783	4.7e-23	1.17e-20	UP
BLM	628.061	1.79522	0.181611	9.88496	4.84e-23	1.2e-20	UP
ROCK2	2938.22	-1.3714	0.138807	-9.8799	5.09e-23	1.25e-20	DOWN
MYL9	24649.2	-3.92966	0.39799	-9.87377	5.41e-23	1.31e-20	DOWN
PDE4D	1165.31	-2.36335	0.239339	-9.87446	5.37e-23	1.31e-20	DOWN
MYOCD	476.63	-4.85133	0.491365	-9.87317	5.44e-23	1.31e-20	DOWN
ZNF106	2331.23	-1.5882	0.16089	-9.87134	5.54e-23	1.33e-20	DOWN
SPAG5	2470.12	2.07752	0.210798	9.85549	6.49e-23	1.54e-20	UP
NUF2	1104.77	2.53272	0.257058	9.85273	6.67e-23	1.57e-20	UP
NKAPL	11.6236	-3.26469	0.331364	-9.85229	6.7e-23	1.57e-20	DOWN
TONSL	1872.16	1.72481	0.17537	9.83527	7.94e-23	1.84e-20	UP
RCAN1	2852.45	-2.69871	0.27477	-9.8217	9.08e-23	2.09e-20	DOWN
F10	104.886	-3.66328	0.37299	-9.82141	9.11e-23	2.09e-20	DOWN
DMD	836.698	-3.91876	0.399182	-9.81698	9.52e-23	2.17e-20	DOWN
FLNC	6419.88	-5.07503	0.517001	-9.8163	9.58e-23	2.17e-20	DOWN
ZEB1	1102.36	-2.9797	0.30374	-9.81005	1.02e-22	2.29e-20	DOWN
BCL2L2	2201.78	-1.52671	0.155781	-9.8004	1.12e-22	2.51e-20	DOWN
PARVA	3217.98	-1.76163	0.180039	-9.78469	1.31e-22	2.91e-20	DOWN
MTURN	1456.37	-2.09943	0.214597	-9.78314	1.33e-22	2.94e-20	DOWN
RHOB	12718.6	-2.2252	0.22755	-9.77896	1.39e-22	3.04e-20	DOWN
MYBL2	4884.26	2.84861	0.29149	9.77255	1.48e-22	3.22e-20	UP
DUSP3	3453.72	-1.48189	0.151804	-9.76188	1.64e-22	3.56e-20	DOWN
LINC00641	289.532	-2.1837	0.22389	-9.75345	1.78e-22	3.85e-20	DOWN
WWTR1	2848.74	-2.15817	0.221337	-9.75064	1.83e-22	3.93e-20	DOWN
KIF4A	1489.82	2.26893	0.23277	9.74754	1.89e-22	4.03e-20	UP
PFKFB4	997.473	2.341	0.240178	9.74695	1.9e-22	4.03e-20	UP
TOR1AIP1	2577.07	-1.21012	0.1243	-9.73551	2.13e-22	4.48e-20	DOWN
TNXB	966.134	-4.33594	0.44554	-9.73187	2.21e-22	4.62e-20	DOWN
FHL1	3817.9	-4.40988	0.453481	-9.7245	2.37e-22	4.91e-20	DOWN
CACNA1H	1319.8	-3.63891	0.374194	-9.72465	2.37e-22	4.91e-20	DOWN
MICU3	66.7405	-3.30324	0.340124	-9.71188	2.68e-22	5.53e-20	DOWN
PTGES3L	45.7373	-2.65251	0.273207	-9.7088	2.77e-22	5.66e-20	DOWN
PPP3CB	2200.75	-1.21126	0.124843	-9.70225	2.95e-22	6.01e-20	DOWN
SORBS2	1380.39	-3.67263	0.379053	-9.68897	3.36e-22	6.8e-20	DOWN
SKA3	704.001	2.10846	0.217665	9.68673	3.43e-22	6.92e-20	UP
SLC25A4	1384.18	-1.74677	0.180493	-9.67779	3.75e-22	7.51e-20	DOWN
NEXN	837.797	-3.40253	0.352055	-9.66478	4.26e-22	8.48e-20	DOWN
TP53INP2	2195.19	-2.34015	0.242172	-9.66319	4.32e-22	8.56e-20	DOWN
ASF1B	1790.6	2.0646	0.21377	9.65802	4.55e-22	8.96e-20	UP
FBXO30	863.152	-1.5135	0.156764	-9.65458	4.7e-22	9.21e-20	DOWN
PRKAG2	989.995	-1.72703	0.178907	-9.65325	4.76e-22	9.28e-20	DOWN
C1QTNF7	138.37	-3.74983	0.388472	-9.65277	4.78e-22	9.28e-20	DOWN
KLF2	968.284	-2.89959	0.300479	-9.64988	4.92e-22	9.49e-20	DOWN
SCARA5	444.422	-5.20097	0.539176	-9.64614	5.1e-22	9.79e-20	DOWN
LTBP4	4527.45	-2.51923	0.261438	-9.63607	5.63e-22	1.07e-19	DOWN
AF131217.1	126.058	-4.53647	0.470773	-9.63621	5.62e-22	1.07e-19	DOWN
FAM107A	420.583	-4.0122	0.416844	-9.6252	6.26e-22	1.18e-19	DOWN
FBXL6	1739.52	1.67966	0.174553	9.62264	6.42e-22	1.21e-19	UP
ADAMTSL3	162.155	-4.31657	0.448639	-9.62147	6.49e-22	1.21e-19	DOWN
SLC26A6	1150.29	1.83824	0.191163	9.61609	6.84e-22	1.27e-19	UP
CDCA3	1260.69	2.13252	0.221794	9.61486	6.92e-22	1.28e-19	UP
ARID5A	1481.42	-2.14106	0.222727	-9.61294	7.05e-22	1.3e-19	DOWN
RECQL4	2291.66	2.10333	0.218883	9.60935	7.3e-22	1.33e-19	UP
BHMT2	96.7371	-4.08389	0.424999	-9.60916	7.31e-22	1.33e-19	DOWN
MSRB3	1768.87	-3.61796	0.376992	-9.59693	8.24e-22	1.49e-19	DOWN
SPARCL1	7713.1	-3.17499	0.330884	-9.59551	8.35e-22	1.51e-19	DOWN
CFD	1696.22	-3.70904	0.386637	-9.59308	8.55e-22	1.54e-19	DOWN
PDE1C	169.055	-3.83124	0.399497	-9.59017	8.79e-22	1.57e-19	DOWN
KCNE4	472.788	-3.651	0.38074	-9.5892	8.88e-22	1.58e-19	DOWN
NEGR1	430.173	-4.19831	0.437923	-9.58687	9.08e-22	1.61e-19	DOWN
GINS1	1263.39	1.99748	0.208396	9.58502	9.24e-22	1.63e-19	UP
SBDS	3359.81	-1.21382	0.126686	-9.58137	9.58e-22	1.68e-19	DOWN
DNAJB5	726.241	-2.92904	0.305802	-9.57823	9.87e-22	1.72e-19	DOWN
NEK2	984.604	2.27594	0.238198	9.55483	1.24e-21	2.14e-19	UP
PAMR1	523.408	-2.87067	0.300433	-9.55511	1.23e-21	2.14e-19	DOWN
EGR3	671.434	-3.71983	0.389681	-9.54583	1.35e-21	2.32e-19	DOWN
MTFR2	328.385	2.03568	0.213309	9.54334	1.38e-21	2.37e-19	UP
KIAA1644	310.052	-4.37736	0.458826	-9.54035	1.42e-21	2.43e-19	DOWN
TNS2	1999.07	-2.1215	0.222493	-9.53512	1.5e-21	2.54e-19	DOWN
PTGS1	3429.03	-4.35931	0.457263	-9.53347	1.52e-21	2.57e-19	DOWN
SPOP	2674.45	-1.13204	0.11883	-9.52656	1.63e-21	2.73e-19	DOWN
ADARB1	1506.15	-2.69327	0.282912	-9.51981	1.73e-21	2.9e-19	DOWN
KLF9	1634.77	-2.73963	0.287866	-9.51702	1.78e-21	2.97e-19	DOWN
SGOL1	464.19	2.25745	0.237353	9.51091	1.89e-21	3.13e-19	UP
FAM72B	108.373	2.55534	0.268974	9.5003	2.09e-21	3.45e-19	UP
PKMYT1	1215.84	2.34543	0.246906	9.49928	2.11e-21	3.47e-19	UP
DUSP1	13361.8	-3.11158	0.327744	-9.49391	2.23e-21	3.64e-19	DOWN
SOX17	158.415	-2.90082	0.305799	-9.48605	2.4e-21	3.91e-19	DOWN
TPX2	5363.67	2.37219	0.250409	9.47329	2.71e-21	4.39e-19	UP
HIPK3	3188.13	-1.62862	0.171948	-9.47163	2.76e-21	4.44e-19	DOWN
CDC6	1816.58	2.00839	0.212239	9.46289	3e-21	4.81e-19	UP
MOGS	5010.99	1.12457	0.118883	9.45947	3.1e-21	4.95e-19	UP
FGL2	1379.55	-3.60398	0.381102	-9.45674	3.18e-21	5.06e-19	DOWN
SYNE1	1466.47	-2.53292	0.267878	-9.4555	3.21e-21	5.09e-19	DOWN
TTK	975.014	2.2167	0.234455	9.45469	3.24e-21	5.09e-19	UP
RBPMS2	578.91	-3.71472	0.392896	-9.45471	3.24e-21	5.09e-19	DOWN
ORC6	756.044	2.08225	0.220323	9.45093	3.36e-21	5.25e-19	UP
GNAL	395.707	-2.96108	0.313881	-9.43377	3.96e-21	6.16e-19	DOWN
RAC3	712.271	2.7398	0.290581	9.42871	4.15e-21	6.44e-19	UP
RNF150	384.672	-3.59736	0.38159	-9.42727	4.21e-21	6.49e-19	DOWN
RP11-523H20.3	27.8621	2.66262	0.282444	9.42707	4.22e-21	6.49e-19	UP
RANBP3L	80.1163	-4.67601	0.496212	-9.42341	4.37e-21	6.69e-19	DOWN
RCC1	4418.64	1.47281	0.156347	9.42012	4.51e-21	6.87e-19	UP
KRT14	45686.1	7.1468	0.759021	9.41581	4.69e-21	7.13e-19	UP
MBNL1	5525.59	-1.33627	0.142088	-9.40452	5.23e-21	7.91e-19	DOWN
NXPH4	472.248	4.38023	0.465848	9.40272	5.32e-21	8.01e-19	UP
FERMT2	1944.55	-2.89617	0.308031	-9.4022	5.34e-21	8.02e-19	DOWN
ZHX3	1128.29	-1.49303	0.158883	-9.39702	5.61e-21	8.39e-19	DOWN
SVILP1	34.2986	-2.99203	0.319187	-9.37389	6.99e-21	1.04e-18	DOWN
P2RY14	88.352	-3.16329	0.337675	-9.36786	7.4e-21	1.1e-18	DOWN
FOS	24470.2	-3.11991	0.334138	-9.3372	9.89e-21	1.46e-18	DOWN
CCSER2	1829.7	-1.32661	0.142229	-9.32728	1.09e-20	1.6e-18	DOWN
MAP1A	921.139	-3.29007	0.353247	-9.31379	1.23e-20	1.81e-18	DOWN
AC009299.5	13.4614	-2.48259	0.266573	-9.31301	1.24e-20	1.81e-18	DOWN
KCTD10	3378.46	-1.06311	0.114212	-9.30818	1.3e-20	1.89e-18	DOWN
KCNMB1	700.559	-3.94151	0.423788	-9.30066	1.4e-20	2.02e-18	DOWN
RP11-531A24.5	66.96	-2.86809	0.308515	-9.29644	1.45e-20	2.09e-18	DOWN
CTC-296K1.3	82.0429	-5.02091	0.54073	-9.28542	1.61e-20	2.31e-18	DOWN
CDC20	3962.22	2.40688	0.259264	9.28351	1.64e-20	2.34e-18	UP
PLK4	679.784	1.74511	0.188103	9.2774	1.74e-20	2.47e-18	UP
AOC3	2352.91	-3.52714	0.380379	-9.27269	1.82e-20	2.57e-18	DOWN
HIST1H2AD	50.7468	4.08362	0.440403	9.27246	1.82e-20	2.57e-18	UP
SH3D19	2240	-1.61956	0.174722	-9.26931	1.87e-20	2.64e-18	DOWN
MYH11	65121	-5.39195	0.581738	-9.2687	1.88e-20	2.64e-18	DOWN
MAP1B	2422.5	-3.40751	0.367909	-9.26183	2.01e-20	2.81e-18	DOWN
CACNB2	184.036	-3.17959	0.343393	-9.25932	2.06e-20	2.86e-18	DOWN
C17orf53	481.299	1.81447	0.195986	9.25814	2.08e-20	2.88e-18	UP
JAM3	1111.36	-2.8188	0.304904	-9.24488	2.36e-20	3.25e-18	DOWN
UBE2T	1082.28	1.78729	0.193594	9.23216	2.65e-20	3.65e-18	UP
HGH1	2149.55	1.37293	0.148854	9.22331	2.88e-20	3.95e-18	UP
STK40	2431.16	-1.39312	0.15105	-9.2229	2.89e-20	3.95e-18	DOWN
ADAMTS9-AS2	25.5782	-4.0149	0.435342	-9.2224	2.91e-20	3.95e-18	DOWN
NPAS4	11.7834	-4.39317	0.476563	-9.21844	3.01e-20	4.09e-18	DOWN
ZBTB47	977.856	-1.5237	0.16532	-9.21663	3.07e-20	4.14e-18	DOWN
ADAMTS9-AS1	117.364	-4.97806	0.540269	-9.21403	3.14e-20	4.23e-18	DOWN
ARHGEF9	962.989	-1.49834	0.16269	-9.20975	3.27e-20	4.38e-18	DOWN
SNRK	1423.96	-1.15147	0.125047	-9.20833	3.31e-20	4.42e-18	DOWN
CRYAB	1591.04	-3.76412	0.408879	-9.20595	3.39e-20	4.51e-18	DOWN
ZNF695	93.4024	2.57408	0.279676	9.20376	3.46e-20	4.58e-18	UP
NR4A3	869.831	-3.87363	0.420916	-9.20285	3.49e-20	4.6e-18	DOWN
PLK1	2466.79	2.22547	0.241915	9.1994	3.6e-20	4.74e-18	UP
LIG1	3044.47	1.3233	0.143864	9.19828	3.64e-20	4.76e-18	UP
ALPP	343.896	6.50158	0.706831	9.19821	3.64e-20	4.76e-18	UP
HMCN2	282.967	-3.72344	0.404826	-9.19762	3.66e-20	4.76e-18	DOWN
ZCCHC24	1271.9	-2.76401	0.300864	-9.18691	4.04e-20	5.25e-18	DOWN
CDC25C	366.421	2.08913	0.22742	9.18623	4.07e-20	5.26e-18	UP
CDC45	1030.43	2.15135	0.234626	9.16927	4.76e-20	6.13e-18	UP
LMOD1	4134.05	-4.46125	0.486836	-9.16375	5.01e-20	6.43e-18	DOWN
PGM5	2035.87	-4.83624	0.528675	-9.14784	5.81e-20	7.43e-18	DOWN
ALG3	3565.8	1.19251	0.130391	9.14563	5.93e-20	7.53e-18	UP
NCAPH	1103.06	2.14312	0.234371	9.14413	6.01e-20	7.61e-18	UP
SLC25A23	1909.33	-2.2418	0.245244	-9.14109	6.18e-20	7.8e-18	DOWN
MIR22HG	1112	-2.15294	0.235554	-9.13988	6.25e-20	7.86e-18	DOWN
RASL12	575.284	-3.13774	0.343431	-9.13645	6.45e-20	8.09e-18	DOWN
NCS1	2681.79	-2.18957	0.240064	-9.12076	7.46e-20	9.31e-18	DOWN
RP11-867G23.10	35.489	-4.27795	0.469272	-9.11616	7.78e-20	9.68e-18	DOWN
BAG2	872.051	-2.7075	0.297411	-9.10356	8.74e-20	1.08e-17	DOWN
DTNA	553.067	-4.00289	0.439969	-9.09811	9.19e-20	1.14e-17	DOWN
KNTC1	1694.93	1.67101	0.183685	9.09714	9.27e-20	1.14e-17	UP
LBX2	87.7893	2.31907	0.255039	9.09297	9.64e-20	1.18e-17	UP
CST2	56.468	6.01362	0.661668	9.08857	1e-19	1.22e-17	UP
LINC01082	42.3866	-4.06055	0.44677	-9.08869	1e-19	1.22e-17	DOWN
TMPO-AS1	218.412	1.94927	0.214531	9.0862	1.03e-19	1.25e-17	UP
TMEM206	726.857	1.45147	0.159768	9.08484	1.04e-19	1.26e-17	UP
IGF2BP1	406.709	6.77851	0.746183	9.08425	1.04e-19	1.26e-17	UP
AQP1	4353.76	-2.46777	0.271899	-9.07606	1.13e-19	1.35e-17	DOWN
RP11-805I24.3	19.6529	-4.22102	0.465193	-9.0737	1.15e-19	1.38e-17	DOWN
FOXF1	806.275	-3.11997	0.343862	-9.07333	1.15e-19	1.38e-17	DOWN
STARD9	328.302	-2.39137	0.263602	-9.07186	1.17e-19	1.39e-17	DOWN
TTYH3	6693.49	1.5097	0.16648	9.0684	1.21e-19	1.43e-17	UP
ZNF25	411.254	-1.41337	0.155946	-9.06322	1.27e-19	1.5e-17	DOWN
WEE1	3031.95	-1.7574	0.194098	-9.05419	1.38e-19	1.62e-17	DOWN
TPPP	366.287	-3.42173	0.377952	-9.05334	1.39e-19	1.63e-17	DOWN
CCDC150	163.166	2.1895	0.241977	9.04835	1.45e-19	1.7e-17	UP
RDM1	124.357	2.96016	0.327186	9.04734	1.46e-19	1.71e-17	UP
DEPDC1B	563.523	2.16672	0.239589	9.0435	1.52e-19	1.77e-17	UP
CSGALNACT1	620.657	-2.13883	0.236519	-9.04298	1.52e-19	1.77e-17	DOWN
SLC38A7	1477.63	1.17127	0.129568	9.03987	1.57e-19	1.82e-17	UP
CCNB2	1979.75	2.02363	0.223932	9.03682	1.61e-19	1.86e-17	UP
NAA40	1604.65	1.15693	0.128147	9.02815	1.75e-19	2.01e-17	UP
DNA2	452.355	1.64868	0.182716	9.02319	1.83e-19	2.09e-17	UP
MRVI1	1445.43	-3.11737	0.345643	-9.01906	1.9e-19	2.17e-17	DOWN
LRRC37A17P	130.687	-2.01041	0.222943	-9.01758	1.92e-19	2.19e-17	DOWN
HIST1H3G	112.966	4.18321	0.463937	9.01675	1.94e-19	2.2e-17	UP
NR4A2	1119.87	-2.87625	0.31901	-9.01617	1.95e-19	2.2e-17	DOWN
CBX8	611.021	1.55272	0.17222	9.01591	1.95e-19	2.2e-17	UP
FANCD2	1468.8	1.66906	0.185131	9.01555	1.96e-19	2.2e-17	UP
PKMP3	15.8291	-2.66729	0.296021	-9.01049	2.05e-19	2.3e-17	DOWN
RP11-613D13.8	15.7885	-3.33845	0.370952	-8.99969	2.26e-19	2.53e-17	DOWN
SAPCD2	1496.63	2.46296	0.273782	8.99605	2.34e-19	2.61e-17	UP
FAM72A	82.1773	2.09903	0.233401	8.9932	2.4e-19	2.67e-17	UP
TMEM132A	4144.54	2.20691	0.245413	8.99262	2.41e-19	2.68e-17	UP
PPP1R14A	610.631	-3.18285	0.354039	-8.9901	2.47e-19	2.73e-17	DOWN
RAD51	729.563	1.81228	0.201677	8.98603	2.56e-19	2.82e-17	UP
TRAK2	1656.01	-1.35228	0.150513	-8.98445	2.6e-19	2.86e-17	DOWN
CC2D2A	535.383	-1.77092	0.1972	-8.98037	2.7e-19	2.95e-17	DOWN
ANTXR2	2592.37	-2.54256	0.283147	-8.97965	2.72e-19	2.96e-17	DOWN
KCNB1	73.8101	-4.78709	0.533183	-8.97834	2.75e-19	2.99e-17	DOWN
TACC2	2828.19	-1.97356	0.220223	-8.96167	3.2e-19	3.47e-17	DOWN
PQLC2	1125.86	1.20607	0.134638	8.95789	3.31e-19	3.58e-17	UP
GADD45B	3047.11	-2.73087	0.304932	-8.95567	3.38e-19	3.64e-17	DOWN
IKZF4	452.928	-1.4744	0.16467	-8.95369	3.44e-19	3.69e-17	DOWN
KLHL15	426.967	-1.45123	0.162085	-8.95348	3.44e-19	3.69e-17	DOWN
ORC1	517.8	2.08703	0.233141	8.95177	3.5e-19	3.74e-17	UP
RP11-358D17.2	10.7048	-4.11479	0.459876	-8.94759	3.63e-19	3.87e-17	DOWN
CHTF18	1629.73	1.74318	0.194932	8.94252	3.8e-19	4.04e-17	UP
ARHGAP20	94.4751	-3.29597	0.368825	-8.93641	4.02e-19	4.26e-17	DOWN
JAM2	364.303	-2.70544	0.303157	-8.92421	4.49e-19	4.74e-17	DOWN
TIMELESS	2936.31	1.46107	0.163747	8.92273	4.55e-19	4.79e-17	UP
TSPYL2	1408.55	-1.67075	0.187326	-8.91894	4.71e-19	4.95e-17	DOWN
TARID	19.7538	-3.8898	0.436178	-8.91792	4.75e-19	4.98e-17	DOWN
CALCOCO1	3156.74	-1.18522	0.132965	-8.91381	4.93e-19	5.15e-17	DOWN
CD34	2144.72	-2.10933	0.236799	-8.90768	5.21e-19	5.43e-17	DOWN
PKIG	2136.54	-2.15654	0.242381	-8.89731	5.72e-19	5.94e-17	DOWN
HIST2H2BF	182.725	3.60845	0.405708	8.89421	5.88e-19	6.09e-17	UP
RP1-34B20.4	57.0453	4.12762	0.464276	8.89044	6.09e-19	6.27e-17	UP
MIR23A	8.42151	-3.87366	0.435837	-8.88785	6.23e-19	6.4e-17	DOWN
PDIA4	15728.5	1.35492	0.15255	8.88185	6.58e-19	6.73e-17	UP
FANCI	2519.79	1.5238	0.171612	8.87934	6.73e-19	6.85e-17	UP
HIST1H3D	88.5714	3.36762	0.379256	8.87956	6.71e-19	6.85e-17	UP
STON1	570.351	-2.61274	0.294316	-8.87734	6.85e-19	6.95e-17	DOWN
CDT1	1732.93	2.0977	0.236333	8.87606	6.93e-19	7.01e-17	UP
APOLD1	1527.18	-2.46045	0.277208	-8.8758	6.94e-19	7.01e-17	DOWN
PDK4	1920.26	-3.61654	0.407502	-8.8749	7e-19	7.05e-17	DOWN
MBD5	648.03	-1.19982	0.135265	-8.8701	7.31e-19	7.34e-17	DOWN
PDE5A	853.414	-2.60714	0.293948	-8.86938	7.36e-19	7.37e-17	DOWN
SLIT3	2168.71	-3.16694	0.357437	-8.86014	7.99e-19	7.98e-17	DOWN
HSPB6	2022.82	-4.76709	0.538075	-8.85952	8.04e-19	8e-17	DOWN
CH25H	229.725	-3.29601	0.372047	-8.8591	8.07e-19	8.01e-17	DOWN
FIGF	71.5883	-3.7496	0.423488	-8.85409	8.44e-19	8.36e-17	DOWN
HBEGF	2105.35	-2.85318	0.322334	-8.85161	8.63e-19	8.52e-17	DOWN
KIFC1	2286.02	2.02227	0.228498	8.85024	8.73e-19	8.6e-17	UP
MELK	1436.19	2.36879	0.267677	8.84942	8.8e-19	8.64e-17	UP
RP11-6O2.4	3.85554	-3.52173	0.398066	-8.84709	8.98e-19	8.8e-17	DOWN
MOAP1	1136.36	-1.1728	0.13266	-8.84068	9.51e-19	9.3e-17	DOWN
RBFOX3	253.233	-5.25655	0.594732	-8.83851	9.7e-19	9.46e-17	DOWN
MLXIP	4618.37	-1.44141	0.163179	-8.83332	1.02e-18	9.88e-17	DOWN
SNX9	3103.49	-1.14358	0.129521	-8.8293	1.05e-18	1.02e-16	DOWN
RP11-102K13.5	131.055	-5.13724	0.581891	-8.82852	1.06e-18	1.03e-16	DOWN
HIST3H2A	908.502	2.43898	0.276419	8.8235	1.11e-18	1.07e-16	UP
PARK2	78.055	-2.7724	0.314449	-8.81671	1.18e-18	1.13e-16	DOWN
RPLP0P2	180.964	3.4898	0.395858	8.81581	1.19e-18	1.14e-16	UP
SLC52A2	5006.2	1.36754	0.155174	8.81293	1.22e-18	1.17e-16	UP
RP3-340N1.2	477.395	5.57956	0.633152	8.81235	1.23e-18	1.17e-16	UP
SRL	36.8349	-3.15937	0.358604	-8.81018	1.25e-18	1.19e-16	DOWN
SKA1	661.192	2.05604	0.23344	8.80755	1.28e-18	1.21e-16	UP
FAM72C	50.5273	2.64818	0.300721	8.8061	1.3e-18	1.23e-16	UP
EMP1	9254.25	-2.90436	0.329896	-8.80387	1.32e-18	1.25e-16	DOWN
TNNI3	93.649	5.79536	0.658441	8.80164	1.35e-18	1.27e-16	UP
NFIX	2132.77	-2.21614	0.251892	-8.79796	1.39e-18	1.31e-16	DOWN
CTC-296K1.4	59.1264	-5.19011	0.590014	-8.79659	1.41e-18	1.32e-16	DOWN
AUNIP	339.051	2.02459	0.230193	8.79522	1.43e-18	1.33e-16	UP
ASB2	399.37	-3.53255	0.401741	-8.79309	1.46e-18	1.35e-16	DOWN
RP11-190C22.1	3.34219	-3.29326	0.374556	-8.79243	1.46e-18	1.36e-16	DOWN
CACNA1C	649.277	-3.06248	0.348517	-8.78718	1.53e-18	1.42e-16	DOWN
SLC19A1	1529.95	1.76019	0.200342	8.78593	1.55e-18	1.43e-16	UP
HELLS	1151.36	1.61024	0.183359	8.78191	1.61e-18	1.48e-16	UP
AURKB	1639.11	2.1607	0.246131	8.77865	1.65e-18	1.52e-16	UP
NFIL3	1699.71	-2.04919	0.233449	-8.77789	1.67e-18	1.53e-16	DOWN
MGME1	1524.02	1.12099	0.127738	8.7757	1.7e-18	1.55e-16	UP
EID1	5413.39	-1.03933	0.11847	-8.77298	1.74e-18	1.58e-16	DOWN
RP11-968A15.2	43.4902	2.29018	0.261048	8.77305	1.74e-18	1.58e-16	UP
KLHL30-AS1	5.35596	-4.31188	0.491953	-8.76483	1.87e-18	1.7e-16	DOWN
KB-1448A5.1	1.78122	-4.17711	0.476956	-8.75786	1.99e-18	1.8e-16	DOWN
PRDM6	305.245	-3.32455	0.379768	-8.75416	2.06e-18	1.86e-16	DOWN
MAFF	3374.61	-2.07993	0.237656	-8.75184	2.1e-18	1.89e-16	DOWN
POLR2H	3358.91	1.08088	0.12358	8.74641	2.2e-18	1.98e-16	UP
CLCN2	539.742	1.43585	0.164195	8.74482	2.23e-18	2e-16	UP
CEP85L	296.372	-1.79874	0.20572	-8.74366	2.26e-18	2.02e-16	DOWN
PYCR1	2722.52	2.68767	0.30751	8.7401	2.33e-18	2.07e-16	UP
TMOD1	232.392	-3.62722	0.415006	-8.74018	2.33e-18	2.07e-16	DOWN
ZCWPW2	26.9666	-1.61121	0.184395	-8.73784	2.38e-18	2.11e-16	DOWN
NFASC	621.303	-2.8664	0.328219	-8.7332	2.48e-18	2.19e-16	DOWN
ATF3	5428.87	-3.16744	0.36285	-8.72933	2.56e-18	2.26e-16	DOWN
FIRRE	122.245	3.70386	0.424543	8.72435	2.68e-18	2.36e-16	UP
PGR	79.3588	-3.35551	0.384626	-8.72408	2.68e-18	2.36e-16	DOWN
PLAC9	244.26	-3.03615	0.348167	-8.72038	2.77e-18	2.43e-16	DOWN
FBXL7	375.68	-2.64746	0.303646	-8.71891	2.81e-18	2.46e-16	DOWN
CIPC	1196.31	-1.23715	0.141984	-8.71333	2.95e-18	2.57e-16	DOWN
CYR61	10408.7	-3.01299	0.346064	-8.70645	3.14e-18	2.73e-16	DOWN
PRKG1	356.042	-3.03043	0.348151	-8.70435	3.19e-18	2.77e-16	DOWN
CENPK	474.652	1.93273	0.222122	8.70121	3.28e-18	2.84e-16	UP
BORA	383.369	1.63012	0.187397	8.69874	3.36e-18	2.9e-16	UP
BUB1B	1141.95	1.9868	0.228665	8.68867	3.67e-18	3.15e-16	UP
SERINC1	5991.13	-1.19156	0.137175	-8.68643	3.74e-18	3.21e-16	DOWN
GRIN2D	1199.81	3.6309	0.418022	8.68592	3.76e-18	3.22e-16	UP
HIST1H2AE	162.358	3.48442	0.401511	8.67827	4.02e-18	3.43e-16	UP
RNF180	115.175	-2.64911	0.305581	-8.66909	4.36e-18	3.71e-16	DOWN
EXO1	614.459	2.15595	0.248718	8.66825	4.39e-18	3.73e-16	UP
AC011530.4	0.952618	-3.26504	0.376738	-8.66659	4.45e-18	3.77e-16	DOWN
IER5L	1363.42	2.0392	0.235346	8.66468	4.53e-18	3.83e-16	UP
PAQR4	819.309	2.111	0.243821	8.65799	4.8e-18	4.05e-16	UP
PDE2A	445.316	-2.7119	0.313318	-8.65542	4.91e-18	4.13e-16	DOWN
RP13-463N16.6	141.148	4.70151	0.543353	8.65278	5.03e-18	4.22e-16	UP
BRIP1	574.684	1.99761	0.230953	8.64942	5.18e-18	4.34e-16	UP
FANCB	114.12	1.89106	0.218641	8.64918	5.19e-18	4.34e-16	UP
PIF1	467.166	1.89806	0.219507	8.64692	5.29e-18	4.41e-16	UP
METTL24	21.9931	-3.73661	0.432237	-8.64482	5.39e-18	4.49e-16	DOWN
MTBP	383.779	1.66595	0.192748	8.64314	5.47e-18	4.54e-16	UP
SPP1	8868.52	4.09716	0.47419	8.64033	5.61e-18	4.64e-16	UP
SALL4	249.522	3.15529	0.36535	8.63636	5.8e-18	4.8e-16	UP
POLD1	2105.91	1.37432	0.159143	8.63575	5.83e-18	4.81e-16	UP
INPP5A	1489.85	-1.41203	0.163632	-8.62931	6.17e-18	5.08e-16	DOWN
ELMSAN1	1729.41	-1.34253	0.155618	-8.62711	6.29e-18	5.17e-16	DOWN
AP000892.6	565.479	-3.7251	0.431916	-8.6246	6.43e-18	5.27e-16	DOWN
VSTM4	559.697	-2.55398	0.296183	-8.62299	6.52e-18	5.33e-16	DOWN
OSBPL10	1280.9	-2.06695	0.239776	-8.62033	6.68e-18	5.44e-16	DOWN
MUC16	1100.63	6.29962	0.731224	8.61518	6.98e-18	5.67e-16	UP
CNST	1090.37	-1.06101	0.123154	-8.6153	6.98e-18	5.67e-16	DOWN
SKP2	2276.61	1.79193	0.208058	8.61263	7.14e-18	5.78e-16	UP
RP5-908M14.10	51.8871	2.37371	0.275654	8.61119	7.23e-18	5.84e-16	UP
GTPBP3	1210.5	1.07289	0.124631	8.60852	7.4e-18	5.97e-16	UP
HCG22	4.98438	-4.52214	0.525341	-8.60801	7.43e-18	5.98e-16	DOWN
ABI3BP	757.522	-3.40819	0.395982	-8.60693	7.5e-18	6.03e-16	DOWN
COX7A1	344.914	-2.7199	0.316115	-8.60414	7.69e-18	6.16e-16	DOWN
PNRC1	3614.22	-1.55858	0.18116	-8.60336	7.74e-18	6.19e-16	DOWN
MIR497HG	38.9621	-2.39413	0.278454	-8.59791	8.12e-18	6.48e-16	DOWN
JUN	12954.6	-2.20729	0.256848	-8.59375	8.42e-18	6.7e-16	DOWN
TCF24	21.6092	3.41948	0.39795	8.59274	8.49e-18	6.74e-16	UP
PDE1A	198.832	-3.00852	0.350148	-8.59213	8.54e-18	6.77e-16	DOWN
CCNB1	3447.5	1.95864	0.227977	8.5914	8.59e-18	6.79e-16	UP
KCNIP4	59.7855	-1.76878	0.206018	-8.58553	9.04e-18	7.13e-16	DOWN
KIF15	758.962	1.9704	0.229526	8.58463	9.11e-18	7.18e-16	UP
IGFL2	162.889	5.69519	0.663828	8.57931	9.54e-18	7.5e-16	UP
RAI2	341.552	-2.78748	0.324956	-8.57804	9.65e-18	7.55e-16	DOWN
IGSF9B	51.8603	-3.59554	0.419158	-8.578	9.65e-18	7.55e-16	DOWN
RP11-6N17.3	15.153	-1.79081	0.208777	-8.57763	9.68e-18	7.56e-16	DOWN
P2RX1	545.603	-4.48304	0.523604	-8.5619	1.11e-17	8.65e-16	DOWN
ACTA2	21146.7	-3.38443	0.395348	-8.56064	1.12e-17	8.71e-16	DOWN
CENPM	760.837	1.95566	0.228449	8.56058	1.12e-17	8.71e-16	UP
TICRR	596.344	1.81098	0.211581	8.55929	1.14e-17	8.79e-16	UP
GNG7	225.665	-2.83037	0.330803	-8.55607	1.17e-17	9.02e-16	DOWN
PPP1CB	13708.8	-1.04065	0.121706	-8.55049	1.23e-17	9.42e-16	DOWN
PRUNE2	1261.21	-4.47808	0.523729	-8.55038	1.23e-17	9.42e-16	DOWN
PLCL1	131.668	-2.52703	0.295554	-8.55014	1.23e-17	9.42e-16	DOWN
PRICKLE2	686.42	-2.37091	0.277392	-8.54712	1.26e-17	9.64e-16	DOWN
HINT3	1432.16	-1.00118	0.117161	-8.54531	1.28e-17	9.78e-16	DOWN
C11orf96	2121.41	-3.15283	0.369272	-8.53795	1.37e-17	1.04e-15	DOWN
MPZ	117.826	-2.38976	0.280191	-8.52904	1.48e-17	1.12e-15	DOWN
C19orf40	340.975	1.3277	0.155688	8.52792	1.49e-17	1.13e-15	UP
FBXO31	1482.27	-1.09542	0.12852	-8.52336	1.55e-17	1.17e-15	DOWN
PSMG3	2616.72	1.39827	0.16407	8.5224	1.56e-17	1.18e-15	UP
RP11-553L6.5	419.104	-1.81757	0.213309	-8.52084	1.58e-17	1.19e-15	DOWN
SHMT2	6614.68	1.33709	0.157005	8.51625	1.65e-17	1.24e-15	UP
LINC00891	4.75665	-3.9864	0.468155	-8.51512	1.66e-17	1.25e-15	DOWN
FOSB	9393.8	-3.77397	0.443497	-8.50958	1.75e-17	1.3e-15	DOWN
CDKL1	62.8883	-1.94612	0.228748	-8.5077	1.77e-17	1.32e-15	DOWN
CPEB4	1252.93	-1.76435	0.20744	-8.50536	1.81e-17	1.35e-15	DOWN
TPM2	15980.6	-3.17671	0.373799	-8.49843	1.92e-17	1.43e-15	DOWN
TIPARP	2330.69	-1.99865	0.235186	-8.49815	1.93e-17	1.43e-15	DOWN
ARHGEF25	840.419	-2.50014	0.294244	-8.49682	1.95e-17	1.44e-15	DOWN
ACTL6A	3373.98	1.11777	0.131621	8.49237	2.02e-17	1.49e-15	UP
ATAD5	508.981	1.6629	0.195925	8.48742	2.11e-17	1.56e-15	UP
TCEAL1	931.656	-1.55072	0.18273	-8.48638	2.13e-17	1.57e-15	DOWN
PABPC1L	2242.56	2.33363	0.275064	8.48397	2.18e-17	1.6e-15	UP
GPRIN1	478.241	2.68803	0.316889	8.48257	2.2e-17	1.61e-15	UP
CYP27B1	241.664	2.3647	0.2789	8.47867	2.28e-17	1.66e-15	UP
CKS2	2093.03	1.76398	0.208092	8.47694	2.31e-17	1.69e-15	UP
CNN1	9767.63	-4.66032	0.550273	-8.4691	2.47e-17	1.8e-15	DOWN
KIF18A	431.375	2.07896	0.245657	8.46285	2.61e-17	1.89e-15	UP
FENDRR	646.216	-3.76861	0.445651	-8.45643	2.76e-17	2e-15	DOWN
PARD3B	395.34	-2.41398	0.285606	-8.45212	2.86e-17	2.07e-15	DOWN
GEM	1063.35	-3.2309	0.382284	-8.45158	2.87e-17	2.07e-15	DOWN
AC011239.2	5.42353	-3.24358	0.38421	-8.44219	3.11e-17	2.24e-15	DOWN
CDC42BPA	2356.35	-1.67222	0.198135	-8.43983	3.18e-17	2.29e-15	DOWN
RP11-108L7.15	32.5516	2.18579	0.259032	8.4383	3.22e-17	2.31e-15	UP
CMTM5	7.54122	-3.8323	0.454271	-8.43615	3.28e-17	2.35e-15	DOWN
C3orf70	367.707	-2.89018	0.34267	-8.4343	3.33e-17	2.38e-15	DOWN
TK1	4594.34	1.98863	0.235953	8.42805	3.51e-17	2.51e-15	UP
PID1	230.321	-3.12211	0.370582	-8.42488	3.61e-17	2.57e-15	DOWN
MYOM2	74.0956	-2.76676	0.328408	-8.42477	3.61e-17	2.57e-15	DOWN
KY	14.2858	-3.37414	0.400557	-8.42362	3.65e-17	2.59e-15	DOWN
ATP5G1P4	24.5183	2.87367	0.3415	8.41487	3.93e-17	2.78e-15	UP
RP11-93G5.1	7.68352	-3.62724	0.431394	-8.40819	4.16e-17	2.94e-15	DOWN
CRTAP	7261.19	-1.29496	0.154021	-8.40772	4.18e-17	2.95e-15	DOWN
OIP5	208.007	1.92846	0.229418	8.40588	4.25e-17	2.99e-15	UP
CENPO	754.111	1.39143	0.165648	8.39991	4.47e-17	3.14e-15	UP
LRRFIP1	6640.49	-1.20437	0.14339	-8.39927	4.49e-17	3.15e-15	DOWN
NFIA	1764.41	-2.04958	0.244094	-8.39668	4.59e-17	3.21e-15	DOWN
ROCK1	2556.49	-1.3565	0.161602	-8.39412	4.69e-17	3.28e-15	DOWN
ALG9	364.02	-1.04486	0.124477	-8.39398	4.7e-17	3.28e-15	DOWN
KIAA0101	1485.7	1.87664	0.223588	8.39331	4.73e-17	3.29e-15	UP
C16orf89	131.676	-4.31517	0.514181	-8.39232	4.77e-17	3.31e-15	DOWN
TSPYL1	3353.18	-1.05538	0.125773	-8.39114	4.81e-17	3.34e-15	DOWN
TRAIP	516.789	1.58082	0.188398	8.39084	4.83e-17	3.34e-15	UP
IER3	4635.62	-2.48548	0.296483	-8.38323	5.15e-17	3.56e-15	DOWN
MIDN	6766.49	-1.32026	0.157531	-8.38094	5.25e-17	3.62e-15	DOWN
SLC8A1	667.601	-2.59018	0.309314	-8.37396	5.57e-17	3.83e-15	DOWN
CKAP2L	852.159	2.14275	0.256029	8.36918	5.8e-17	3.98e-15	UP
FAM172A	762.79	-1.14942	0.13734	-8.36915	5.8e-17	3.98e-15	DOWN
RAET1K	17.6016	3.45583	0.413146	8.36467	6.03e-17	4.12e-15	UP
KREMEN2	180.415	3.62005	0.432928	8.36177	6.18e-17	4.22e-15	UP
MCM2	4332.48	1.83989	0.22009	8.35971	6.29e-17	4.28e-15	UP
ITGA1	2366.89	-2.21159	0.26465	-8.35667	6.45e-17	4.38e-15	DOWN
SLC1A6	1816.77	6.42037	0.768303	8.35657	6.46e-17	4.38e-15	UP
ATP2B4	6778.54	-2.08407	0.249654	-8.34783	6.95e-17	4.71e-15	DOWN
ITGA9	554.809	-2.36759	0.283704	-8.34529	7.1e-17	4.8e-15	DOWN
THRA	1450.98	-1.7161	0.20565	-8.34478	7.13e-17	4.82e-15	DOWN
EML1	697.433	-2.49515	0.299145	-8.34093	7.37e-17	4.97e-15	DOWN
LRCH1	1007.83	-1.28953	0.154639	-8.33897	7.49e-17	5.04e-15	DOWN
CLIP3	1053.84	-2.96614	0.355777	-8.33708	7.61e-17	5.1e-15	DOWN
TPSG1	12.7615	-3.27668	0.393018	-8.33721	7.61e-17	5.1e-15	DOWN
PRELP	1663.46	-3.73837	0.448682	-8.33189	7.96e-17	5.32e-15	DOWN
NCAPG	1153.73	1.99837	0.239897	8.33013	8.08e-17	5.39e-15	UP
MYO19	2705.28	1.28549	0.154335	8.32923	8.14e-17	5.42e-15	UP
CCL2	1624.73	-3.29314	0.395399	-8.32865	8.18e-17	5.44e-15	DOWN
RGS2	2746.07	-2.89704	0.347915	-8.32684	8.3e-17	5.51e-15	DOWN
DNAJC18	311.657	-1.47494	0.177199	-8.32364	8.53e-17	5.65e-15	DOWN
BARX1	199.441	5.34629	0.643083	8.31354	9.29e-17	6.15e-15	UP
DOK6	175.933	-3.57886	0.430558	-8.31213	9.4e-17	6.21e-15	DOWN
KLF4	2548.21	-2.44598	0.294427	-8.3076	9.77e-17	6.44e-15	DOWN
BMPR1A	1271.82	-1.06893	0.128707	-8.30516	9.97e-17	6.56e-15	DOWN
LRRC2	44.5269	-3.85419	0.464093	-8.30477	1e-16	6.57e-15	DOWN
CDCA2	496.782	2.0492	0.246799	8.30309	1.01e-16	6.65e-15	UP
SLC5A6	3730.37	1.75887	0.211847	8.30257	1.02e-16	6.66e-15	UP
PGM5P4	10.7034	-5.31765	0.640483	-8.30257	1.02e-16	6.66e-15	DOWN
ADAMTS4	1983.55	-3.00842	0.36265	-8.29567	1.08e-16	7.03e-15	DOWN
TSC22D1	9303.17	-1.67749	0.202335	-8.29066	1.13e-16	7.32e-15	DOWN
MIR568	14.2765	-2.28278	0.275483	-8.28646	1.17e-16	7.57e-15	DOWN
ECE2	762.11	1.65507	0.199785	8.28428	1.19e-16	7.69e-15	UP
SAMD4A	803.732	-2.3735	0.286652	-8.28009	1.23e-16	7.96e-15	DOWN
IGIP	445.76	-1.33978	0.161824	-8.27922	1.24e-16	7.99e-15	DOWN
DISP1	319.66	-1.75743	0.212274	-8.2791	1.24e-16	7.99e-15	DOWN
C1QTNF6	2824.53	2.49881	0.301963	8.27521	1.28e-16	8.21e-15	UP
RP11-359E3.4	72.7039	-1.72898	0.208938	-8.2751	1.28e-16	8.21e-15	DOWN
GPR112	1.89361	-5.27741	0.637713	-8.27552	1.28e-16	8.21e-15	DOWN
ASPM	1515.42	2.21659	0.2679	8.27393	1.3e-16	8.28e-15	UP
KIF26B	1132.97	2.73613	0.330933	8.26793	1.36e-16	8.69e-15	UP
HIST1H2BJ	243.31	3.05924	0.370219	8.26333	1.42e-16	9.01e-15	UP
CENPI	351.305	1.87368	0.226807	8.2611	1.44e-16	9.17e-15	UP
CST4	43.8307	6.74528	0.816706	8.25913	1.47e-16	9.3e-15	UP
PYGB	9238.43	-1.81451	0.219884	-8.25213	1.56e-16	9.85e-15	DOWN
HMMR	964.929	2.00847	0.243591	8.24524	1.65e-16	1.04e-14	UP
KNOP1	1094.6	1.10839	0.134481	8.24195	1.69e-16	1.07e-14	UP
NEK1	578.019	-1.22294	0.148499	-8.2353	1.79e-16	1.13e-14	DOWN
LATS2	1026.38	-1.71714	0.208539	-8.23418	1.81e-16	1.14e-14	DOWN
ARHGAP11B	351.429	1.59322	0.193634	8.22798	1.9e-16	1.19e-14	UP
TNNT1	556.107	4.3068	0.523463	8.22752	1.91e-16	1.2e-14	UP
GEN1	976.452	1.3269	0.161302	8.22616	1.93e-16	1.21e-14	UP
AFF3	200.926	-3.89162	0.473131	-8.22526	1.95e-16	1.22e-14	DOWN
EVA1A	257.545	3.71069	0.4512	8.22404	1.97e-16	1.23e-14	UP
LINC00460	48.2077	7.1179	0.865665	8.22246	1.99e-16	1.24e-14	UP
HSPG2	9968.21	-2.16529	0.263434	-8.21948	2.04e-16	1.27e-14	DOWN
LAMA2	916.372	-2.54569	0.309819	-8.21671	2.09e-16	1.3e-14	DOWN
CCNF	1587.22	1.40095	0.170525	8.21549	2.11e-16	1.31e-14	UP
KIF20A	1865.15	1.96492	0.239207	8.21431	2.13e-16	1.32e-14	UP
MCAM	5237.06	-2.05448	0.250348	-8.20647	2.28e-16	1.41e-14	DOWN
DBF4	746.819	1.2785	0.1558	8.20607	2.29e-16	1.41e-14	UP
MIR4697HG	137.255	-3.81275	0.464685	-8.20502	2.31e-16	1.42e-14	DOWN
MAMDC2	321.155	-3.64628	0.444478	-8.20352	2.33e-16	1.43e-14	DOWN
RNASEH2A	2110.53	1.43911	0.175476	8.20119	2.38e-16	1.46e-14	UP
JAZF1	521.904	-2.11538	0.257962	-8.20036	2.4e-16	1.47e-14	DOWN
FAM13B	1220.93	-1.49046	0.181788	-8.19889	2.43e-16	1.48e-14	DOWN
JPH2	833.655	-3.59538	0.438538	-8.19857	2.43e-16	1.48e-14	DOWN
PRR11	1303.92	1.95191	0.238087	8.19832	2.44e-16	1.48e-14	UP
FAM189A2	172.989	-2.80634	0.342462	-8.19461	2.51e-16	1.53e-14	DOWN
OR8T1P	3.44099	-2.50494	0.305765	-8.19238	2.56e-16	1.55e-14	DOWN
DPP3	3749.74	1.05511	0.128799	8.19195	2.57e-16	1.56e-14	UP
FILIP1L	2065.19	-2.64437	0.322995	-8.18704	2.68e-16	1.62e-14	DOWN
RP11-1055B8.9	26.9024	3.70159	0.452132	8.18697	2.68e-16	1.62e-14	UP
2023-03-04	60.6544	5.18957	0.634113	8.18399	2.75e-16	1.65e-14	UP
PI16	784.904	-5.52247	0.674814	-8.18369	2.75e-16	1.66e-14	DOWN
NAGS	212.719	2.15203	0.263223	8.17569	2.94e-16	1.77e-14	UP
RUSC2	1154.51	-1.86823	0.228525	-8.17513	2.96e-16	1.77e-14	DOWN
GPR133	353.117	-4.15486	0.508277	-8.1744	2.97e-16	1.78e-14	DOWN
ISL2	95.128	2.43308	0.297722	8.17232	3.03e-16	1.81e-14	UP
THBS1	20197.1	-2.835	0.346948	-8.17125	3.05e-16	1.82e-14	DOWN
ODF3L1	27.391	-2.93117	0.358866	-8.16787	3.14e-16	1.87e-14	DOWN
MEIS1	989.937	-1.82126	0.22313	-8.16233	3.29e-16	1.95e-14	DOWN
OTX1	239.832	2.41159	0.295481	8.16158	3.31e-16	1.96e-14	UP
TOP2A	8351.38	2.02394	0.248064	8.15896	3.38e-16	2e-14	UP
RP11-435O5.2	71.4052	1.86148	0.228228	8.15623	3.46e-16	2.05e-14	UP
ARHGEF39	522.966	1.65746	0.203305	8.15255	3.56e-16	2.11e-14	UP
RP11-175K6.1	22.4464	-2.70948	0.33251	-8.14859	3.68e-16	2.17e-14	DOWN
THSD4	1131.33	-2.27895	0.279752	-8.14634	3.75e-16	2.21e-14	DOWN
KIF23	1589.27	1.81157	0.222453	8.1436	3.84e-16	2.26e-14	UP
SLC37A4	1581.23	1.26805	0.155779	8.14007	3.95e-16	2.32e-14	UP
CYB561	5991.17	1.22214	0.150163	8.13873	3.99e-16	2.34e-14	UP
CELSR3	1206.1	2.62419	0.32253	8.13628	4.08e-16	2.38e-14	UP
GNAO1	286.414	-3.50821	0.431183	-8.13624	4.08e-16	2.38e-14	DOWN
HAND2-AS1	120.665	-4.34817	0.534572	-8.13394	4.16e-16	2.42e-14	DOWN
BCL2L12	1376.7	1.34012	0.16479	8.13226	4.21e-16	2.45e-14	UP
PARPBP	466.992	1.5579	0.191571	8.13221	4.22e-16	2.45e-14	UP
LRRC45	2090.73	1.44527	0.177779	8.12959	4.31e-16	2.5e-14	UP
NPY6R	44.4762	-5.01242	0.616668	-8.12824	4.36e-16	2.52e-14	DOWN
CCNE1	1305.32	2.21802	0.27293	8.1267	4.41e-16	2.55e-14	UP
DENND5A	2097.08	-1.39859	0.172129	-8.12528	4.46e-16	2.58e-14	DOWN
POLE2	344.919	1.61006	0.19822	8.12257	4.56e-16	2.63e-14	UP
EBF1	303.229	-2.58578	0.318408	-8.12095	4.63e-16	2.66e-14	DOWN
GYG1	2567.68	-1.11238	0.137	-8.11959	4.68e-16	2.69e-14	DOWN
DACT3	455.069	-3.24166	0.399307	-8.11821	4.73e-16	2.71e-14	DOWN
CPEB2	696.454	-1.84864	0.227726	-8.11782	4.75e-16	2.72e-14	DOWN
TRIB1	5776.12	-1.85232	0.228214	-8.11659	4.79e-16	2.74e-14	DOWN
MKI67	6040.86	1.95352	0.240726	8.11515	4.85e-16	2.76e-14	UP
KLHL10	4.69859	-2.31006	0.28469	-8.11428	4.89e-16	2.78e-14	DOWN
CPEB1	62.5235	-3.48042	0.428941	-8.11398	4.9e-16	2.78e-14	DOWN
FAM168B	4368.32	-1.16208	0.14333	-8.10772	5.16e-16	2.92e-14	DOWN
FXYD1	31.1082	-3.0896	0.381181	-8.10535	5.26e-16	2.98e-14	DOWN
ERCC6L	365.754	1.97118	0.24325	8.10349	5.34e-16	3.02e-14	UP
FXYD6	1028.75	-3.45783	0.426727	-8.10315	5.36e-16	3.02e-14	DOWN
ZNF525	670.329	1.37441	0.169627	8.10258	5.38e-16	3.03e-14	UP
FGB	40.9775	9.40597	1.16096	8.10188	5.41e-16	3.04e-14	UP
CELF2	732.578	-2.6914	0.332217	-8.10131	5.44e-16	3.05e-14	DOWN
PER1	2692.16	-2.12098	0.261818	-8.10096	5.45e-16	3.06e-14	DOWN
HIST1H2BH	130.035	3.58188	0.442269	8.09888	5.55e-16	3.11e-14	UP
TARBP2	1781.75	1.08194	0.133617	8.09737	5.62e-16	3.14e-14	UP
TM4SF19	85.8166	4.83845	0.59759	8.09661	5.65e-16	3.15e-14	UP
RP1-118J21.25	19.186	3.56393	0.440245	8.09532	5.71e-16	3.18e-14	UP
AC007392.3	6.57737	-2.62976	0.325039	-8.0906	5.94e-16	3.3e-14	DOWN
CTGF	9361.43	-3.07897	0.380608	-8.08962	5.99e-16	3.32e-14	DOWN
HMGA2	747.238	5.5925	0.691352	8.08922	6e-16	3.33e-14	UP
WNT3	235.536	2.37441	0.293643	8.08605	6.16e-16	3.41e-14	UP
CALR	55348	1.06209	0.131372	8.08459	6.24e-16	3.44e-14	UP
TGFB1I1	1898.07	-2.34359	0.289991	-8.0816	6.39e-16	3.52e-14	DOWN
NR3C2	263.374	-3.18381	0.394015	-8.08043	6.45e-16	3.54e-14	DOWN
RP11-64B16.2	54.7823	-3.08733	0.382072	-8.08048	6.45e-16	3.54e-14	DOWN
JUNB	19480.7	-1.73655	0.214953	-8.07871	6.55e-16	3.59e-14	DOWN
LHX5	68.2796	4.53293	0.561118	8.07839	6.56e-16	3.59e-14	UP
RP1-65J11.1	6.14791	-3.81293	0.472177	-8.07522	6.74e-16	3.68e-14	DOWN
MAGI2	248.771	-2.00018	0.247713	-8.07457	6.77e-16	3.69e-14	DOWN
HIST1H2BG	166.776	3.50517	0.434097	8.07464	6.77e-16	3.69e-14	UP
ACTN2	94.9339	-4.57576	0.566699	-8.07441	6.78e-16	3.69e-14	DOWN
CLIC4	7237.44	-2.27165	0.281461	-8.07093	6.98e-16	3.79e-14	DOWN
ITGA7	1320.48	-2.94619	0.36504	-8.07088	6.98e-16	3.79e-14	DOWN
CREM	1046.04	-1.46952	0.182113	-8.06927	7.07e-16	3.83e-14	DOWN
SBSPON	647.377	-3.40033	0.42145	-8.06818	7.14e-16	3.86e-14	DOWN
MEF2C-AS1	14.8918	-3.27553	0.405996	-8.06787	7.15e-16	3.86e-14	DOWN
CCDC136	179.356	-2.50162	0.310141	-8.06608	7.26e-16	3.91e-14	DOWN
CREBRF	851.575	-1.31411	0.162938	-8.0651	7.32e-16	3.94e-14	DOWN
RNF38	1590.82	-1.13043	0.140197	-8.06318	7.43e-16	3.99e-14	DOWN
MCM10	765.654	2.0767	0.257552	8.06322	7.43e-16	3.99e-14	UP
NECAB1	169.245	-3.22528	0.400034	-8.06252	7.47e-16	4.01e-14	DOWN
CKMT2	52.7922	-2.73809	0.339676	-8.0609	7.57e-16	4.05e-14	DOWN
HIST1H2BD	1005.36	2.35318	0.291932	8.06071	7.58e-16	4.05e-14	UP
ATP1B2	90.3362	-2.52089	0.312958	-8.05504	7.95e-16	4.24e-14	DOWN
RP11-1055B8.1	65.8979	3.08843	0.383419	8.05496	7.95e-16	4.24e-14	UP
LMO3	544.809	-3.81556	0.47372	-8.05447	7.98e-16	4.25e-14	DOWN
FZD7	1275.53	-2.07417	0.25764	-8.05066	8.23e-16	4.38e-14	DOWN
CA9	1544.79	4.3514	0.540666	8.04823	8.4e-16	4.46e-14	UP
SSPN	1010.93	-1.99761	0.248228	-8.04749	8.45e-16	4.48e-14	DOWN
HAAO	268.255	-2.32144	0.288535	-8.04559	8.58e-16	4.54e-14	DOWN
PDZRN4	155.948	-4.88272	0.606931	-8.04494	8.63e-16	4.56e-14	DOWN
RP11-442O1.3	4.88583	-3.20485	0.398387	-8.04456	8.66e-16	4.57e-14	DOWN
MIS18A	1026.43	1.27483	0.158518	8.04218	8.83e-16	4.65e-14	UP
AGRN	23980.8	1.56823	0.195037	8.04067	8.94e-16	4.69e-14	UP
TSPAN18	790.07	-2.65375	0.330037	-8.04077	8.93e-16	4.69e-14	DOWN
CENPE	1178.59	1.79366	0.223092	8.04	8.98e-16	4.71e-14	UP
MYLK2	27.1727	2.48831	0.309511	8.03949	9.02e-16	4.73e-14	UP
REEP1	263.993	-3.91295	0.4868	-8.0381	9.12e-16	4.77e-14	DOWN
C19orf48	4262	1.42031	0.17679	8.03386	9.45e-16	4.93e-14	UP
SETD7	2944.1	-1.36122	0.169468	-8.03233	9.56e-16	4.98e-14	DOWN
GATA6	367.462	-2.87762	0.358256	-8.03231	9.57e-16	4.98e-14	DOWN
UGCG	3536.38	-1.51376	0.188492	-8.03093	9.67e-16	5.03e-14	DOWN
DDIAS	529.754	1.73122	0.215599	8.02978	9.76e-16	5.07e-14	UP
CTB-193M12.4	18.7754	-2.99247	0.37271	-8.02894	9.83e-16	5.1e-14	DOWN
RP11-486O12.2	140	1.5402	0.19186	8.0277	9.93e-16	5.14e-14	UP
CHEK1	1137	1.49603	0.18639	8.02635	1e-15	5.19e-14	UP
ACTG2	20825.4	-4.35326	0.542851	-8.01926	1.06e-15	5.49e-14	DOWN
RP11-932O9.10	26.2332	2.3814	0.297002	8.01814	1.07e-15	5.54e-14	UP
EZH2	1473.93	1.71601	0.214105	8.01483	1.1e-15	5.67e-14	UP
HIST1H1PS1	26.5149	3.79253	0.474306	7.99595	1.29e-15	6.6e-14	UP
RP11-359B12.2	87.947	-1.643	0.205535	-7.99381	1.31e-15	6.71e-14	DOWN
CHAF1B	938.809	1.67431	0.209463	7.99334	1.31e-15	6.72e-14	UP
C9orf163	28.123	2.54924	0.318973	7.99201	1.33e-15	6.79e-14	UP
RP11-74M13.4	2.4063	-3.4022	0.425737	-7.9913	1.34e-15	6.82e-14	DOWN
SOCS3	7455.36	-2.39992	0.300355	-7.99029	1.35e-15	6.86e-14	DOWN
PPM1L	1281.87	-2.1676	0.271393	-7.98696	1.38e-15	7.04e-14	DOWN
NUSAP1	2521.63	1.83351	0.229594	7.98589	1.4e-15	7.09e-14	UP
RN7SL689P	18.5083	-1.84122	0.230579	-7.98519	1.4e-15	7.12e-14	DOWN
SLC39A4	2373.84	1.99579	0.249948	7.98481	1.41e-15	7.14e-14	UP
ZWILCH	1108.08	1.12084	0.140388	7.98392	1.42e-15	7.18e-14	UP
TAGLN	24515.7	-3.33626	0.418117	-7.97924	1.47e-15	7.44e-14	DOWN
TACC3	5052.93	1.86064	0.23321	7.97837	1.48e-15	7.49e-14	UP
WFDC1	719.132	-2.6197	0.328703	-7.96981	1.59e-15	8.01e-14	DOWN
FLAD1	3004.75	1.05954	0.132959	7.96893	1.6e-15	8.06e-14	UP
TRIP13	1518.27	2.09019	0.262696	7.95671	1.77e-15	8.88e-14	UP
PDZRN3	704.805	-3.08953	0.388402	-7.95445	1.8e-15	9.04e-14	DOWN
PRR19	151.069	1.7956	0.225788	7.95261	1.83e-15	9.16e-14	UP
TSACC	33.0891	2.00632	0.252364	7.9501	1.86e-15	9.32e-14	UP
CNGB1	136.988	3.81641	0.480264	7.94648	1.92e-15	9.58e-14	UP
PPAPDC1A	200.742	4.21529	0.530631	7.94391	1.96e-15	9.77e-14	UP
YDJC	1742.21	1.53253	0.193048	7.93861	2.04e-15	1.02e-13	UP
AC011298.2	18.6616	6.51832	0.821101	7.93852	2.05e-15	1.02e-13	UP
NTRK3	75.2096	-3.9227	0.494194	-7.93758	2.06e-15	1.02e-13	DOWN
DLGAP5	1245.49	2.01536	0.253924	7.93685	2.07e-15	1.03e-13	UP
RP11-875O11.1	22.2969	-1.85213	0.23337	-7.93645	2.08e-15	1.03e-13	DOWN
KCNA5	28.3809	-3.37739	0.425621	-7.9352	2.1e-15	1.04e-13	DOWN
RP11-180I4.4	2.13004	-4.47059	0.563405	-7.93495	2.11e-15	1.04e-13	DOWN
CST6	1255.55	3.95361	0.49852	7.9307	2.18e-15	1.07e-13	UP
AC002116.7	32.9691	1.74429	0.219948	7.93047	2.18e-15	1.08e-13	UP
NDC80	1189.55	1.88719	0.238054	7.92758	2.23e-15	1.1e-13	UP
H2AFX	4257.56	1.51175	0.190868	7.92039	2.37e-15	1.16e-13	UP
PCOLCE2	352.62	-3.82539	0.483395	-7.91359	2.5e-15	1.23e-13	DOWN
JAZF1-AS1	5.23846	-3.21111	0.406084	-7.90749	2.63e-15	1.29e-13	DOWN
CAMK2A	48.1937	-3.76249	0.475844	-7.90699	2.64e-15	1.29e-13	DOWN
ZNF114	201.291	4.00773	0.506964	7.90535	2.67e-15	1.31e-13	UP
TMEM74B	332.084	2.83128	0.358253	7.90302	2.72e-15	1.33e-13	UP
HERC1	2128.48	-1.07263	0.135741	-7.90202	2.74e-15	1.34e-13	DOWN
ZFPM2	223.229	-2.80375	0.354882	-7.9005	2.78e-15	1.35e-13	DOWN
KRT6B	4141.02	6.93698	0.878071	7.90025	2.78e-15	1.35e-13	UP
FOXM1	2879.17	2.05522	0.260169	7.89955	2.8e-15	1.36e-13	UP
LRRC46	80.1807	1.7808	0.225458	7.8986	2.82e-15	1.37e-13	UP
NCALD	519.593	-2.33246	0.295355	-7.89713	2.85e-15	1.38e-13	DOWN
HIST3H2BB	111.972	2.82197	0.357458	7.89455	2.91e-15	1.41e-13	UP
LINC00865	338.633	-2.38198	0.301768	-7.89342	2.94e-15	1.42e-13	DOWN
MYH3	336.749	-3.14024	0.398009	-7.88986	3.03e-15	1.46e-13	DOWN
WDHD1	889.911	1.54957	0.196427	7.88876	3.05e-15	1.47e-13	UP
LINC00702	138.033	-3.54874	0.450046	-7.88528	3.14e-15	1.51e-13	DOWN
SGCB	1399.62	-1.73914	0.220669	-7.88124	3.24e-15	1.55e-13	DOWN
IBSP	47.3863	3.93264	0.498986	7.88128	3.24e-15	1.55e-13	UP
DNMT3B	899.361	2.21356	0.280884	7.88069	3.26e-15	1.56e-13	UP
HIST1H2BO	23.108	4.17735	0.530106	7.88022	3.27e-15	1.56e-13	UP
PTBP2	773.319	-1.26623	0.160797	-7.8747	3.42e-15	1.63e-13	DOWN
MRGPRF	809.826	-3.06918	0.389826	-7.87319	3.46e-15	1.65e-13	DOWN
LEPR	404.195	-2.16057	0.27468	-7.86574	3.67e-15	1.75e-13	DOWN
SPC24	973.708	1.78746	0.227311	7.8635	3.74e-15	1.78e-13	UP
RP5-1074L1.4	287.948	1.74164	0.221496	7.86307	3.75e-15	1.78e-13	UP
DDR2	1275.92	-2.79991	0.35611	-7.8625	3.77e-15	1.79e-13	DOWN
BAG3	4222.47	-1.48724	0.189228	-7.85952	3.86e-15	1.83e-13	DOWN
MIR4653	29.9592	2.35603	0.299856	7.85722	3.93e-15	1.86e-13	UP
GPR124	1666.94	-2.4301	0.309368	-7.85504	4e-15	1.89e-13	DOWN
DUS1L	7499.87	1.17082	0.149137	7.85065	4.14e-15	1.95e-13	UP
MCM4	7372.52	1.47407	0.187796	7.84934	4.18e-15	1.97e-13	UP
NFIC	4135.07	-1.4527	0.185095	-7.84842	4.21e-15	1.98e-13	DOWN
RP11-855A2.5	3.69624	-3.7219	0.474321	-7.8468	4.27e-15	2.01e-13	DOWN
RERG	264.191	-2.73431	0.348478	-7.84643	4.28e-15	2.01e-13	DOWN
MYOC	77.9918	-5.57135	0.710222	-7.84451	4.35e-15	2.04e-13	DOWN
BUB1	1749.77	1.71792	0.219023	7.84355	4.38e-15	2.05e-13	UP
MPDZ	855.278	-1.82352	0.232494	-7.84329	4.39e-15	2.05e-13	DOWN
RP11-498C9.4	20.6785	2.54224	0.324279	7.83965	4.52e-15	2.11e-13	UP
RP11-214N9.1	32.1923	1.97631	0.25239	7.83036	4.86e-15	2.27e-13	UP
C5orf46	78.5131	4.91541	0.628144	7.82529	5.06e-15	2.36e-13	UP
TMEM52B	209.485	4.12303	0.527034	7.82309	5.15e-15	2.39e-13	UP
MAD2L1	1389.82	1.72524	0.220554	7.82229	5.19e-15	2.41e-13	UP
ETV4	1846.44	2.56611	0.328066	7.82193	5.2e-15	2.41e-13	UP
CHRNA1	39.6952	3.79783	0.486012	7.81428	5.53e-15	2.56e-13	UP
RP11-307C12.11	86.7343	2.03121	0.260035	7.81128	5.66e-15	2.62e-13	UP
CTC-203F4.2	31.7736	-1.62082	0.207501	-7.81114	5.67e-15	2.62e-13	DOWN
KNSTRN	1051.8	1.37619	0.176217	7.80964	5.74e-15	2.64e-13	UP
IL36RN	191.276	5.04501	0.646069	7.80879	5.77e-15	2.66e-13	UP
C20orf144	20.5882	2.08184	0.267088	7.79457	6.46e-15	2.96e-13	UP
LRRN4CL	155.937	-2.75873	0.354006	-7.79289	6.55e-15	3e-13	DOWN
DLG2	83.9481	-2.55177	0.327485	-7.79201	6.59e-15	3.02e-13	DOWN
RP1-191J18.66	47.6257	1.60152	0.205646	7.78776	6.82e-15	3.12e-13	UP
ITGA5	8866.37	-2.57966	0.331304	-7.78637	6.9e-15	3.14e-13	DOWN
ARHGAP10	1530.07	-1.55574	0.1998	-7.78652	6.89e-15	3.14e-13	DOWN
NME1	4096.03	1.29685	0.166613	7.78361	7.05e-15	3.21e-13	UP
CTD-2357A8.3	39.5583	4.56936	0.587139	7.78242	7.12e-15	3.23e-13	UP
PLCB4	386.785	-3.08797	0.397032	-7.77763	7.39e-15	3.35e-13	DOWN
CCNA2	1713.57	1.79229	0.23045	7.77735	7.41e-15	3.36e-13	UP
CPEB3	222.063	-1.34784	0.17345	-7.77079	7.8e-15	3.53e-13	DOWN
RP11-54H7.4	673.075	6.05392	0.779234	7.76907	7.91e-15	3.57e-13	UP
REV3L	933.308	-1.56218	0.201075	-7.76915	7.9e-15	3.57e-13	DOWN
KIAA1614	180.746	-1.7403	0.224078	-7.76653	8.07e-15	3.64e-13	DOWN
EN1	151.965	5.83086	0.751202	7.76204	8.36e-15	3.76e-13	UP
PPP1R12C	4701.22	-1.11368	0.143537	-7.75887	8.57e-15	3.85e-13	DOWN
TMEM220	104.362	-2.16162	0.278641	-7.75771	8.65e-15	3.88e-13	DOWN
RYR2	181.707	-3.3521	0.432536	-7.74987	9.2e-15	4.12e-13	DOWN
DCHS1	1002.08	-2.28361	0.294724	-7.7483	9.31e-15	4.17e-13	DOWN
TBX20	43.624	-4.52222	0.583773	-7.74654	9.44e-15	4.22e-13	DOWN
SPRY1	1708.91	-1.99116	0.257144	-7.74338	9.68e-15	4.32e-13	DOWN
SORCS1	44.1478	-4.39702	0.568032	-7.74079	9.88e-15	4.41e-13	DOWN
CCDC58	948.459	1.01668	0.13141	7.73669	1.02e-14	4.55e-13	UP
CEP68	1149.43	-1.0109	0.130725	-7.73304	1.05e-14	4.67e-13	DOWN
RP1-86C11.7	67.1317	2.8971	0.374667	7.73249	1.05e-14	4.69e-13	UP
LAMC3	784.348	-2.50169	0.323637	-7.72992	1.08e-14	4.78e-13	DOWN
MNX1	92.5967	3.32141	0.429801	7.72777	1.09e-14	4.85e-13	UP
AMOTL1	2948.51	-2.01374	0.260649	-7.72586	1.11e-14	4.92e-13	DOWN
RP11-533E19.7	29.3923	2.06013	0.266798	7.72167	1.15e-14	5.08e-13	UP
RP11-521B24.4	207.719	1.86295	0.241284	7.72097	1.15e-14	5.1e-13	UP
DONSON	1136.1	1.39688	0.180925	7.72075	1.16e-14	5.1e-13	UP
CDCA5	1984.89	1.89791	0.245845	7.71995	1.16e-14	5.13e-13	UP
RP11-887P2.5	30.6394	-4.53077	0.586895	-7.71989	1.16e-14	5.13e-13	DOWN
MEIS2	933.801	-1.888	0.244608	-7.71847	1.18e-14	5.18e-13	DOWN
IL6ST	4224.9	-1.74632	0.226292	-7.71709	1.19e-14	5.23e-13	DOWN
BLOC1S3	1100.19	1.113	0.144275	7.71448	1.21e-14	5.33e-13	UP
VIPR2	31.33	-3.49464	0.453241	-7.71033	1.25e-14	5.5e-13	DOWN
FAM111B	802.984	2.16834	0.281402	7.70548	1.3e-14	5.7e-13	UP
ULBP1	55.6857	3.08516	0.400385	7.70548	1.3e-14	5.7e-13	UP
CTB-36H16.2	60.3999	-1.89844	0.246513	-7.70116	1.35e-14	5.88e-13	DOWN
STARD13	664.599	-2.02905	0.263519	-7.69981	1.36e-14	5.94e-13	DOWN
DDX11	1809.93	1.2923	0.167847	7.6993	1.37e-14	5.95e-13	UP
FBLN5	1252.94	-2.46764	0.320574	-7.69756	1.39e-14	6.03e-13	DOWN
FAT4	303.195	-2.52915	0.328657	-7.69539	1.41e-14	6.12e-13	DOWN
RP5-1198O20.4	86.9612	-2.63204	0.342129	-7.69311	1.44e-14	6.22e-13	DOWN
ITM2A	508.309	-2.65631	0.345345	-7.69175	1.45e-14	6.28e-13	DOWN
RP11-713P17.3	12.3929	-3.0153	0.392169	-7.68878	1.49e-14	6.41e-13	DOWN
RAD51AP1	636.358	1.81453	0.236064	7.68659	1.51e-14	6.51e-13	UP
SH3BGRL	4333.2	-1.55751	0.202699	-7.68386	1.54e-14	6.64e-13	DOWN
RP11-679B19.1	26.4457	-2.99526	0.390111	-7.67797	1.62e-14	6.94e-13	DOWN
HSD17B6	306.949	-2.69629	0.351269	-7.67585	1.64e-14	7.05e-13	DOWN
DBF4B	613.207	1.19933	0.156306	7.67298	1.68e-14	7.2e-13	UP
FAR2P1	232.83	5.75818	0.750736	7.67004	1.72e-14	7.36e-13	UP
RP11-34F20.7	23.1891	2.332	0.304071	7.66927	1.73e-14	7.39e-13	UP
C14orf28	205.364	-1.08049	0.140899	-7.66857	1.74e-14	7.42e-13	DOWN
CCDC137	2478.48	1.02903	0.134203	7.66773	1.75e-14	7.46e-13	UP
ANLN	3084.74	2.04164	0.266272	7.6675	1.75e-14	7.47e-13	UP
RFC5	1243.79	1.10537	0.144169	7.66721	1.76e-14	7.48e-13	UP
C2orf40	131.337	-4.65224	0.606781	-7.66707	1.76e-14	7.48e-13	DOWN
DAAM2	399.285	-2.36007	0.307886	-7.66541	1.78e-14	7.57e-13	DOWN
KRT81	449.725	5.07282	0.66182	7.66496	1.79e-14	7.58e-13	UP
RP11-1100L3.8	48.1381	-2.90843	0.379542	-7.66301	1.82e-14	7.69e-13	DOWN
DNAJC27	243.623	-1.06462	0.138953	-7.6617	1.83e-14	7.76e-13	DOWN
ECT2	2259.11	1.6806	0.21939	7.66031	1.85e-14	7.84e-13	UP
SMUG1	1948.04	1.07867	0.140875	7.65697	1.9e-14	8.03e-13	UP
PLP1	82.6232	-4.34356	0.567555	-7.65309	1.96e-14	8.27e-13	DOWN
DDX12P	219.974	1.68157	0.219877	7.64777	2.04e-14	8.6e-13	UP
HIPK4	11.6595	-2.20934	0.288944	-7.64625	2.07e-14	8.69e-13	DOWN
CTD-2555O16.2	26.5771	-1.50454	0.197138	-7.63194	2.31e-14	9.69e-13	DOWN
OR2B6	22.3646	4.21229	0.552061	7.63012	2.35e-14	9.82e-13	UP
AKAP12	2467.53	-2.70854	0.355204	-7.62531	2.43e-14	1.02e-12	DOWN
AKAP13	4371.73	-1.23301	0.161743	-7.62326	2.47e-14	1.03e-12	DOWN
GPC2	297.054	3.077	0.403727	7.62148	2.51e-14	1.04e-12	UP
AC006262.5	414.076	4.69291	0.615769	7.62121	2.51e-14	1.05e-12	UP
MYZAP	493.55	-2.52039	0.330799	-7.61909	2.55e-14	1.06e-12	DOWN
KIAA0232	1876	-1.05576	0.138653	-7.6144	2.65e-14	1.1e-12	DOWN
RGS5	5462.76	-2.54998	0.334909	-7.61393	2.66e-14	1.1e-12	DOWN
CDCA4	1659.45	1.48361	0.194915	7.61156	2.71e-14	1.12e-12	UP
SPEG	973.206	-3.20101	0.42083	-7.60642	2.82e-14	1.17e-12	DOWN
LINC00950	42.8878	-2.45695	0.323084	-7.60469	2.86e-14	1.18e-12	DOWN
KLF6	10908.4	-1.61706	0.212669	-7.60363	2.88e-14	1.19e-12	DOWN
PPP1R14D	136.652	4.52513	0.59518	7.60296	2.89e-14	1.19e-12	UP
ACYP1	478.209	1.2241	0.161015	7.60242	2.91e-14	1.2e-12	UP
LMNB1	3340.72	1.56151	0.205409	7.60197	2.92e-14	1.2e-12	UP
RP11-398C13.6	56.5506	1.53845	0.20238	7.60178	2.92e-14	1.2e-12	UP
ABCA8	259.037	-3.42772	0.451346	-7.59444	3.09e-14	1.27e-12	DOWN
AF001548.3	5.00748	-4.41057	0.580881	-7.59289	3.13e-14	1.28e-12	DOWN
NAP1L5	255.457	-1.70091	0.22407	-7.59098	3.17e-14	1.3e-12	DOWN
PDLIM3	2553.61	-3.22763	0.425291	-7.58923	3.22e-14	1.32e-12	DOWN
IGF2BP3	322.345	4.36567	0.575387	7.58735	3.27e-14	1.33e-12	UP
RP11-182J1.17	7.50515	-1.72541	0.227468	-7.58527	3.32e-14	1.35e-12	DOWN
KANK1	3067.16	-1.78949	0.235971	-7.58349	3.36e-14	1.37e-12	DOWN
RAD54B	243.338	1.51657	0.200038	7.58143	3.42e-14	1.39e-12	UP
CENPH	681.099	1.40143	0.184876	7.5804	3.45e-14	1.4e-12	UP
TMX4	2328.19	-1.30525	0.17226	-7.57721	3.53e-14	1.43e-12	DOWN
ZBTB21	852.32	-1.1872	0.156721	-7.57521	3.59e-14	1.45e-12	DOWN
CDC25A	692.517	1.65377	0.218311	7.57528	3.58e-14	1.45e-12	UP
F8	326.841	-1.83037	0.241631	-7.57504	3.59e-14	1.45e-12	DOWN
AC108448.2	5.00908	-2.52714	0.333768	-7.57155	3.69e-14	1.49e-12	DOWN
DTL	932.871	1.73417	0.229321	7.56221	3.96e-14	1.6e-12	UP
CASQ2	613.32	-4.83514	0.63953	-7.56046	4.02e-14	1.62e-12	DOWN
NPR2	328.947	-1.73041	0.228895	-7.55985	4.04e-14	1.63e-12	DOWN
DUXAP10	46.2488	3.20594	0.424074	7.55986	4.04e-14	1.63e-12	UP
HSPB8	3964.06	-3.19662	0.422873	-7.55929	4.05e-14	1.63e-12	DOWN
MRGBP	1524.81	1.01519	0.134302	7.55903	4.06e-14	1.63e-12	UP
SLC35A2	2795.96	1.171	0.154933	7.55812	4.09e-14	1.64e-12	UP
C4orf26	44.1153	4.77751	0.632284	7.55596	4.16e-14	1.67e-12	UP
RP4-800J21.3	11.4776	-2.21956	0.29376	-7.55571	4.17e-14	1.67e-12	DOWN
BRCA2	648.212	1.70807	0.226145	7.55297	4.25e-14	1.7e-12	UP
RBKS	227.559	-1.43726	0.190327	-7.55154	4.3e-14	1.72e-12	DOWN
PPP1R14B	6485.4	1.32045	0.174872	7.55097	4.32e-14	1.73e-12	UP
KIF14	669.45	1.99	0.263573	7.5501	4.35e-14	1.73e-12	UP
TFAP4	951.63	1.13557	0.150421	7.54926	4.38e-14	1.74e-12	UP
RP11-498E2.9	10.3599	-3.83432	0.508171	-7.54534	4.51e-14	1.8e-12	DOWN
KIF11	1966.16	1.61813	0.21447	7.54478	4.53e-14	1.8e-12	UP
COL14A1	2405.68	-2.88739	0.382724	-7.54432	4.55e-14	1.8e-12	DOWN
SPC25	420.38	1.76371	0.233782	7.54424	4.55e-14	1.8e-12	UP
HIST1H2AG	159.596	2.66268	0.352994	7.54312	4.59e-14	1.82e-12	UP
FAM64A	645.345	2.12085	0.281221	7.54156	4.64e-14	1.84e-12	UP
BIRC5	3302.39	1.88852	0.250429	7.54114	4.66e-14	1.84e-12	UP
CTD-2020K17.3	72.0059	2.12362	0.281775	7.53656	4.83e-14	1.91e-12	UP
KB-1440D3.13	21.4534	3.50948	0.46584	7.53367	4.93e-14	1.95e-12	UP
DSN1	1409.1	1.17066	0.155443	7.53109	5.03e-14	1.98e-12	UP
KCNAB1	90.1947	-1.69546	0.225227	-7.52775	5.16e-14	2.03e-12	DOWN
LINC00908	11.0275	-2.89577	0.384711	-7.52714	5.19e-14	2.04e-12	DOWN
ADAM33	381.981	-3.18581	0.423265	-7.52674	5.2e-14	2.04e-12	DOWN
CTIF	1602.57	-1.18212	0.157107	-7.52426	5.3e-14	2.08e-12	DOWN
RPS6KA2	1357.82	-1.71754	0.228286	-7.5236	5.33e-14	2.09e-12	DOWN
NLRP7	353.853	5.01953	0.667245	7.52277	5.36e-14	2.1e-12	UP
ASPA	90.4259	-3.33318	0.443258	-7.51974	5.49e-14	2.14e-12	DOWN
HIST1H2BF	30.3298	3.85587	0.513076	7.51521	5.68e-14	2.22e-12	UP
KPNA2	8023.82	1.48862	0.198118	7.51378	5.74e-14	2.24e-12	UP
SLC25A39	10275.4	1.02344	0.136244	7.51183	5.83e-14	2.27e-12	UP
ATP1A2	541.071	-4.73862	0.631097	-7.50855	5.98e-14	2.32e-12	DOWN
SERTAD1	1581.97	-1.45355	0.193615	-7.50742	6.03e-14	2.34e-12	DOWN
CASP14	4307.21	5.61469	0.748111	7.50515	6.14e-14	2.38e-12	UP
PLN	702.415	-4.12614	0.549912	-7.50327	6.22e-14	2.41e-12	DOWN
RNFT2	266.485	2.17009	0.289317	7.50072	6.35e-14	2.46e-12	UP
KIAA1524	685.721	1.59775	0.213037	7.49989	6.39e-14	2.47e-12	UP
BTG2	15340.3	-2.25401	0.300582	-7.49883	6.44e-14	2.49e-12	DOWN
LINC01352	5.45802	-3.21567	0.428924	-7.49705	6.53e-14	2.52e-12	DOWN
PBXIP1	8154.39	-1.29135	0.172285	-7.49541	6.61e-14	2.55e-12	DOWN
RECK	333.688	-2.08682	0.278432	-7.49492	6.63e-14	2.55e-12	DOWN
ARHGAP1	7900.58	-1.09807	0.146518	-7.49442	6.66e-14	2.56e-12	DOWN
S100A7A	237.698	8.26798	1.10343	7.493	6.73e-14	2.59e-12	UP
PPP1R14BP3	1105.43	1.48407	0.198202	7.48767	7.01e-14	2.69e-12	UP
KRTDAP	688.233	6.06633	0.81062	7.48356	7.23e-14	2.77e-12	UP
DIP2C	1331.76	-1.43597	0.19189	-7.4833	7.25e-14	2.78e-12	DOWN
CATSPER1	175.638	3.50558	0.468483	7.48285	7.27e-14	2.78e-12	UP
ERVV-2	24.0734	6.43005	0.859462	7.48148	7.35e-14	2.81e-12	UP
CHAC1	286.276	2.1719	0.290389	7.47928	7.47e-14	2.85e-12	UP
RTN4R	340.939	2.25639	0.302048	7.4703	8e-14	3.05e-12	UP
C20orf166-AS1	43.6909	-4.30558	0.576619	-7.46694	8.21e-14	3.13e-12	DOWN
TBC1D7	1008.52	1.15925	0.15527	7.46602	8.27e-14	3.15e-12	UP
LDB3	130.129	-2.86472	0.383725	-7.46557	8.29e-14	3.15e-12	DOWN
RALGDS	4408.01	-1.13669	0.152364	-7.46035	8.63e-14	3.27e-12	DOWN
ALKBH6	245.56	1.31002	0.175639	7.45861	8.74e-14	3.31e-12	UP
PSORS1C2	977.67	4.8616	0.652281	7.45323	9.11e-14	3.45e-12	UP
MORN5	11.2852	-4.94499	0.663544	-7.45239	9.17e-14	3.47e-12	DOWN
CDC37L1	906.788	-1.06743	0.143294	-7.4492	9.39e-14	3.55e-12	DOWN
EPHA3	383.303	-2.69265	0.361616	-7.44614	9.61e-14	3.63e-12	DOWN
KDM6B	3253.56	-1.33618	0.179468	-7.44522	9.68e-14	3.65e-12	DOWN
TLX1	46.6919	6.426	0.863153	7.4448	9.71e-14	3.66e-12	UP
LRCH2	175.925	-2.65084	0.356078	-7.44456	9.73e-14	3.66e-12	DOWN
ZBTB16	102.116	-3.73263	0.501598	-7.44149	9.96e-14	3.74e-12	DOWN
ANKS1B	39.3715	-3.35151	0.450406	-7.4411	9.98e-14	3.74e-12	DOWN
RP11-474G23.3	23.7332	2.02497	0.272229	7.4385	1.02e-13	3.82e-12	UP
SOX11	42.2594	3.40331	0.45763	7.43681	1.03e-13	3.86e-12	UP
TBX5	107.757	-3.02068	0.406542	-7.43018	1.08e-13	4.05e-12	DOWN
HIST1H4E	39.9278	3.46739	0.467025	7.42443	1.13e-13	4.23e-12	UP
RP11-386G11.5	26.1693	2.44508	0.329401	7.42279	1.15e-13	4.27e-12	UP
RP11-424C20.2	43.5839	2.18978	0.295104	7.42037	1.17e-13	4.35e-12	UP
CSAG1	402.744	6.03623	0.813879	7.41661	1.2e-13	4.47e-12	UP
RELL2	173.277	1.61774	0.21815	7.41571	1.21e-13	4.5e-12	UP
AOX1	233.439	-3.61773	0.488208	-7.41022	1.26e-13	4.68e-12	DOWN
HIST1H2AI	34.5584	3.46687	0.468464	7.4005	1.36e-13	5.03e-12	UP
CAP2	497.97	-2.28563	0.308878	-7.3998	1.36e-13	5.05e-12	DOWN
MYOT	29.0338	-2.7138	0.366922	-7.3961	1.4e-13	5.19e-12	DOWN
PTGFR	156.533	-3.53069	0.477401	-7.39565	1.41e-13	5.2e-12	DOWN
JMY	1069.37	-1.14371	0.154651	-7.39543	1.41e-13	5.21e-12	DOWN
ELANE	6.82753	-3.71998	0.503074	-7.39449	1.42e-13	5.24e-12	DOWN
E2F7	503.822	2.16028	0.292343	7.38956	1.47e-13	5.43e-12	UP
PAFAH1B3	3428.83	1.62774	0.220324	7.38794	1.49e-13	5.49e-12	UP
SYNPO	3612.57	-1.8646	0.252397	-7.38756	1.5e-13	5.5e-12	DOWN
HIST1H1C	3726.73	2.45818	0.332764	7.38714	1.5e-13	5.51e-12	UP
RFC4	1447.34	1.39994	0.189546	7.38573	1.52e-13	5.56e-12	UP
MAPK15	436.842	2.82469	0.382465	7.38548	1.52e-13	5.57e-12	UP
EFNA4	945.901	1.3545	0.18344	7.38391	1.54e-13	5.62e-12	UP
SIRT1	924.729	-1.07907	0.146135	-7.38402	1.54e-13	5.62e-12	DOWN
BRCA1	1161.57	1.38557	0.187695	7.38205	1.56e-13	5.69e-12	UP
HSD3B1	129.513	7.0489	0.954915	7.3817	1.56e-13	5.7e-12	UP
RP11-400N13.2	81.3468	7.64235	1.03531	7.3817	1.56e-13	5.7e-12	UP
GRIN3B	36.284	2.78482	0.377303	7.38086	1.57e-13	5.73e-12	UP
RFX2	720.841	-1.42308	0.192839	-7.37963	1.59e-13	5.77e-12	DOWN
TCEAL7	90.686	-2.59277	0.351339	-7.37967	1.59e-13	5.77e-12	DOWN
ADCY5	629.927	-3.35206	0.454325	-7.37813	1.61e-13	5.83e-12	DOWN
C1orf35	1445.98	1.03931	0.140913	7.37551	1.64e-13	5.94e-12	UP
AP000695.4	51.1023	2.64997	0.359439	7.37251	1.67e-13	6.07e-12	UP
BID	2853.84	1.20774	0.163825	7.37213	1.68e-13	6.08e-12	UP
KAT2A	4785.61	1.15481	0.156656	7.37164	1.69e-13	6.1e-12	UP
RP11-545I5.3	57.9983	-1.56677	0.212569	-7.37064	1.7e-13	6.14e-12	DOWN
CNGA3	9.42479	-3.97565	0.539559	-7.36833	1.73e-13	6.24e-12	DOWN
TERT	129.814	3.35961	0.456153	7.36508	1.77e-13	6.37e-12	UP
PTCH1	603.798	-1.62863	0.22117	-7.36368	1.79e-13	6.43e-12	DOWN
STON1-GTF2A1L	8.35828	-3.57686	0.485736	-7.3638	1.79e-13	6.43e-12	DOWN
RP11-903H12.5	3.91996	-2.50426	0.340103	-7.36326	1.79e-13	6.44e-12	DOWN
RNF112	63.8999	-2.42659	0.329729	-7.35935	1.85e-13	6.62e-12	DOWN
HN1	11138	1.36653	0.185725	7.35784	1.87e-13	6.69e-12	UP
ACOX2	122.062	-2.75191	0.374069	-7.35671	1.89e-13	6.74e-12	DOWN
OLFML1	266.2	-2.29807	0.312387	-7.3565	1.89e-13	6.74e-12	DOWN
CTD-3203P2.3	13.8217	-2.21902	0.301663	-7.35595	1.9e-13	6.76e-12	DOWN
MFAP4	4024.92	-3.13852	0.426808	-7.35347	1.93e-13	6.88e-12	DOWN
SGCA	258.486	-3.66187	0.498007	-7.35305	1.94e-13	6.9e-12	DOWN
ERC1	2460.95	-1.36505	0.185657	-7.35253	1.94e-13	6.92e-12	DOWN
HIST1H3B	18.8152	4.00565	0.545074	7.34881	2e-13	7.11e-12	UP
GSG2	193.387	1.84727	0.251468	7.34595	2.04e-13	7.25e-12	UP
NDC1	2310.92	1.03992	0.141608	7.34369	2.08e-13	7.37e-12	UP
GPRASP2	390.1	-1.46801	0.199928	-7.34268	2.09e-13	7.42e-12	DOWN
SCN11A	137.548	-4.31654	0.587933	-7.3419	2.11e-13	7.45e-12	DOWN
MIR4786	1.78546	-2.39338	0.326029	-7.341	2.12e-13	7.5e-12	DOWN
CTD-2337A12.1	3.24196	-2.44905	0.333644	-7.3403	2.13e-13	7.53e-12	DOWN
CDKN2A	2959.6	4.03189	0.549326	7.3397	2.14e-13	7.56e-12	UP
CTC-510F12.2	30.4223	-1.78099	0.242917	-7.3317	2.27e-13	8.01e-12	DOWN
CTB-92J24.2	94.0346	2.26162	0.308486	7.33136	2.28e-13	8.02e-12	UP
FAM46B	574.537	-3.1761	0.433297	-7.33007	2.3e-13	8.09e-12	DOWN
MIR27A	4.76781	-4.07582	0.556336	-7.32619	2.37e-13	8.32e-12	DOWN
GS1-600G8.5	77.7592	5.94934	0.812218	7.32481	2.39e-13	8.4e-12	UP
MIR221	6.57961	-3.33993	0.456047	-7.32366	2.41e-13	8.47e-12	DOWN
RBPMS	3909.84	-1.79573	0.245219	-7.32298	2.43e-13	8.5e-12	DOWN
RP11-166D19.1	498.396	-2.98346	0.407597	-7.31962	2.49e-13	8.71e-12	DOWN
SOX5	58.2217	-2.38323	0.325601	-7.31949	2.49e-13	8.71e-12	DOWN
ABCC9	276.492	-2.59368	0.354545	-7.31553	2.56e-13	8.96e-12	DOWN
RP11-199F11.2	81.0947	1.66374	0.227475	7.31392	2.59e-13	9.06e-12	UP
PPP1R3B	1822.57	-1.76793	0.241752	-7.31299	2.61e-13	9.11e-12	DOWN
CDK5	992.78	1.04331	0.142722	7.31009	2.67e-13	9.3e-12	UP
SGCD	347.068	-3.29933	0.451336	-7.31013	2.67e-13	9.3e-12	DOWN
MYADM	4996.94	-2.42928	0.332472	-7.30671	2.74e-13	9.52e-12	DOWN
RHEBL1	112.468	1.87041	0.25605	7.30489	2.77e-13	9.64e-12	UP
TTLL11	147.107	-1.259	0.172394	-7.30305	2.81e-13	9.77e-12	DOWN
MIR143HG	194.241	-3.48944	0.477815	-7.30291	2.82e-13	9.77e-12	DOWN
KRT79	111.324	4.87187	0.667199	7.30198	2.84e-13	9.83e-12	UP
ABLIM1	5068.62	-1.69125	0.231642	-7.30116	2.85e-13	9.88e-12	DOWN
PELI2	430.969	-2.34682	0.32147	-7.30028	2.87e-13	9.93e-12	DOWN
S100A7	3605.16	5.97973	0.819179	7.29965	2.89e-13	9.97e-12	UP
RGS22	17.3572	-3.2046	0.439299	-7.2948	2.99e-13	1.03e-11	DOWN
RP11-753H16.3	21.964	-4.31715	0.591906	-7.29363	3.02e-13	1.04e-11	DOWN
CTD-3252C9.4	1257	-1.97151	0.270502	-7.28833	3.14e-13	1.08e-11	DOWN
PCNA	7806.74	1.31621	0.180601	7.28794	3.15e-13	1.08e-11	UP
RP11-560J1.2	31.1346	1.99943	0.274377	7.28715	3.17e-13	1.09e-11	UP
AF186192.5	7.72779	-3.3416	0.45874	-7.28431	3.23e-13	1.11e-11	DOWN
RP11-1275H24.2	26.4451	2.12944	0.292437	7.28168	3.3e-13	1.13e-11	UP
RP11-753H16.5	7.50518	-3.05974	0.420275	-7.28034	3.33e-13	1.14e-11	DOWN
SPRR2D	333.861	5.52471	0.758926	7.27963	3.35e-13	1.14e-11	UP
C3orf18	208.686	-1.6709	0.229529	-7.27968	3.35e-13	1.14e-11	DOWN
TRPC3	41.0623	-2.86197	0.393144	-7.27968	3.35e-13	1.14e-11	DOWN
CDC7	702.036	1.46856	0.201772	7.27831	3.38e-13	1.15e-11	UP
AC005229.1	40.5113	-1.21895	0.167562	-7.27464	3.47e-13	1.18e-11	DOWN
CCNE2	290.667	2.01089	0.276467	7.27353	3.5e-13	1.19e-11	UP
MEF2A	1687.12	-1.15229	0.158501	-7.2699	3.6e-13	1.22e-11	DOWN
LRRK2	226.54	-2.48728	0.342198	-7.26854	3.63e-13	1.24e-11	DOWN
ENTHD2	955.131	1.05961	0.145783	7.2684	3.64e-13	1.24e-11	UP
MTG1	489.292	1.2778	0.175813	7.26798	3.65e-13	1.24e-11	UP
RNASE4	49.876	-1.9777	0.272344	-7.26177	3.82e-13	1.3e-11	DOWN
CTC-332L22.1	9.36897	-1.54339	0.21268	-7.25688	3.96e-13	1.34e-11	DOWN
ANXA6	5068.56	-2.38002	0.328087	-7.25424	4.04e-13	1.37e-11	DOWN
ENTPD1	2330.2	-1.42224	0.19612	-7.25188	4.11e-13	1.39e-11	DOWN
SLC12A8	982.619	2.01433	0.277838	7.25003	4.17e-13	1.41e-11	UP
CEP55	1648.16	1.73061	0.23871	7.24985	4.17e-13	1.41e-11	UP
DDX39A	4833.96	1.054	0.145501	7.24394	4.36e-13	1.47e-11	UP
LHX1	64.6317	6.29134	0.868768	7.24168	4.43e-13	1.49e-11	UP
MEX3A	2065.48	2.55736	0.353218	7.24016	4.48e-13	1.51e-11	UP
HIST1H1D	21.2157	3.22854	0.445956	7.23959	4.5e-13	1.51e-11	UP
CIT	1423.81	1.51843	0.209772	7.23848	4.54e-13	1.52e-11	UP
C16orf45	699.342	-2.17579	0.300602	-7.23811	4.55e-13	1.53e-11	DOWN
FAM19A2	48.6696	-1.78463	0.246564	-7.23801	4.55e-13	1.53e-11	DOWN
A2M	25692	-2.29947	0.317741	-7.23694	4.59e-13	1.54e-11	DOWN
HABP4	535.618	-1.53111	0.211694	-7.23264	4.74e-13	1.58e-11	DOWN
RP11-141C7.3	28.919	2.65606	0.367427	7.22881	4.87e-13	1.63e-11	UP
ALB	176.065	5.8573	0.810336	7.22824	4.89e-13	1.63e-11	UP
IL37	9.62587	4.64565	0.642722	7.22809	4.9e-13	1.63e-11	UP
CDC42EP3	2468.05	-1.78234	0.246603	-7.22757	4.92e-13	1.64e-11	DOWN
RP5-1120P11.1	94.7073	3.23391	0.447465	7.22718	4.93e-13	1.64e-11	UP
TFR2	252.626	2.44627	0.338526	7.22624	4.97e-13	1.65e-11	UP
ACTC1	4277.86	-5.32948	0.737932	-7.22219	5.12e-13	1.7e-11	DOWN
SNHG1	2693.34	1.18176	0.163626	7.2223	5.11e-13	1.7e-11	UP
RP11-736K20.4	52.8878	-2.2359	0.309669	-7.22028	5.19e-13	1.72e-11	DOWN
HSPB7	807.298	-3.84636	0.53276	-7.21969	5.21e-13	1.73e-11	DOWN
HIST1H2BC	215.26	2.70682	0.374937	7.21941	5.22e-13	1.73e-11	UP
KLK6	571.419	6.11035	0.846586	7.21764	5.29e-13	1.75e-11	UP
HIST1H3H	339.523	2.87594	0.398461	7.21762	5.29e-13	1.75e-11	UP
RUNDC3B	51.609	-2.00404	0.27779	-7.21422	5.42e-13	1.79e-11	DOWN
MTHFD1L	1809.45	1.48508	0.205938	7.2113	5.54e-13	1.83e-11	UP
C4orf48	360.775	2.33891	0.324408	7.20976	5.61e-13	1.85e-11	UP
CYBRD1	2802.78	-2.28858	0.317558	-7.20682	5.73e-13	1.88e-11	DOWN
CASC5	911.501	1.67467	0.232444	7.20463	5.82e-13	1.91e-11	UP
PSRC1	637.384	1.52828	0.212303	7.19861	6.08e-13	2e-11	UP
CTD-2510F5.4	128.851	2.02259	0.281062	7.19624	6.19e-13	2.03e-11	UP
RP11-98D18.9	33.4504	2.1721	0.301839	7.1962	6.19e-13	2.03e-11	UP
RP3-414A15.12	19.1956	-2.04777	0.284566	-7.1961	6.2e-13	2.03e-11	DOWN
CENPU	1199.96	1.56363	0.21735	7.19405	6.29e-13	2.06e-11	UP
GPBAR1	76.762	-2.33876	0.325179	-7.1922	6.38e-13	2.08e-11	DOWN
LRRC3B	14.2804	-5.16981	0.719089	-7.18938	6.51e-13	2.12e-11	DOWN
BCL10	1394.86	-1.10532	0.153751	-7.18902	6.53e-13	2.13e-11	DOWN
ZGRF1	351.391	1.38322	0.192414	7.18877	6.54e-13	2.13e-11	UP
ACTA2-AS1	113.45	-2.94552	0.409929	-7.18543	6.7e-13	2.18e-11	DOWN
PLA2G5	118.543	-3.21224	0.447099	-7.18463	6.74e-13	2.19e-11	DOWN
STMN1	14575.8	1.65388	0.230232	7.18352	6.79e-13	2.2e-11	UP
RP5-965F6.2	2.93717	-3.25729	0.453434	-7.18361	6.79e-13	2.2e-11	DOWN
EPHB1	112.698	-2.99965	0.417595	-7.18316	6.81e-13	2.21e-11	DOWN
FOXP2	263.373	-3.06897	0.427289	-7.18242	6.85e-13	2.22e-11	DOWN
C16orf93	85.5776	1.65164	0.230089	7.17826	7.06e-13	2.28e-11	UP
MEF2C	738.643	-1.94845	0.271517	-7.17617	7.17e-13	2.31e-11	DOWN
EIF4E3	1183.45	-1.4693	0.204782	-7.17494	7.23e-13	2.33e-11	DOWN
FBXW9	728.872	1.01542	0.141643	7.16889	7.56e-13	2.44e-11	UP
KRT6C	798.603	6.51786	0.909323	7.16783	7.62e-13	2.45e-11	UP
LGI4	234.423	-2.26548	0.316082	-7.16737	7.65e-13	2.46e-11	DOWN
TMEM249	12.1842	2.95002	0.411607	7.16707	7.66e-13	2.46e-11	UP
GRASP	446.598	-1.93855	0.270813	-7.15828	8.17e-13	2.62e-11	DOWN
SMOC2	1797.49	-2.99639	0.418843	-7.15397	8.43e-13	2.7e-11	DOWN
C20orf194	1327.42	-1.32969	0.185869	-7.15388	8.44e-13	2.7e-11	DOWN
SPDYC	40.7219	5.63882	0.788296	7.15317	8.48e-13	2.72e-11	UP
FANCG	1424.62	1.2107	0.169274	7.15228	8.53e-13	2.73e-11	UP
WNT2B	229.745	-1.78137	0.249101	-7.15118	8.6e-13	2.75e-11	DOWN
CTA-384D8.31	415.939	4.26963	0.597487	7.14597	8.94e-13	2.86e-11	UP
NBEA	364.213	-2.83474	0.396752	-7.14486	9.01e-13	2.88e-11	DOWN
OGN	368.194	-4.54008	0.635513	-7.14397	9.07e-13	2.89e-11	DOWN
TES	5008.39	-1.37134	0.19204	-7.14092	9.27e-13	2.95e-11	DOWN
CKS1B	1813.13	1.44407	0.202278	7.13902	9.4e-13	2.99e-11	UP
NXPH3	245.478	-2.77945	0.389397	-7.13783	9.48e-13	3.01e-11	DOWN
HIST1H2BE	16.0258	3.33463	0.467539	7.13231	9.87e-13	3.13e-11	UP
AC005062.2	19.3069	-2.4002	0.33653	-7.13221	9.88e-13	3.13e-11	DOWN
BRI3BP	1505.74	1.25326	0.175793	7.1292	1.01e-12	3.2e-11	UP
STAB2	19.8274	-2.78091	0.390135	-7.12807	1.02e-12	3.22e-11	DOWN
RP5-963E22.6	16.622	2.23706	0.313956	7.12539	1.04e-12	3.28e-11	UP
PGM5P4-AS1	2.76644	-4.29685	0.603055	-7.12514	1.04e-12	3.28e-11	DOWN
ULBP2	344.941	2.3889	0.335286	7.12498	1.04e-12	3.29e-11	UP
TMEM223	1119.47	1.02589	0.144021	7.12318	1.05e-12	3.33e-11	UP
GPR135	67.6223	-1.83697	0.257993	-7.1202	1.08e-12	3.4e-11	DOWN
TTLL7	446.599	-2.33676	0.32821	-7.11969	1.08e-12	3.41e-11	DOWN
MID2	319.7	-1.33615	0.187779	-7.11555	1.11e-12	3.5e-11	DOWN
KIAA0907	2547.24	1.18243	0.16623	7.11319	1.13e-12	3.56e-11	UP
BDKRB2	942.531	-2.14984	0.302308	-7.11141	1.15e-12	3.6e-11	DOWN
STRA13	2806.77	1.19084	0.167544	7.10761	1.18e-12	3.7e-11	UP
FEN1	2885.68	1.47157	0.207046	7.10743	1.18e-12	3.7e-11	UP
MPL	7.46553	-1.71155	0.240844	-7.10647	1.19e-12	3.72e-11	DOWN
KCNQ4	117.988	-2.62945	0.370028	-7.10609	1.19e-12	3.73e-11	DOWN
RP4-666F24.3	1.54593	-3.345	0.470717	-7.10618	1.19e-12	3.73e-11	DOWN
MRM1	658.676	1.18571	0.166883	7.10505	1.2e-12	3.75e-11	UP
HIST1H4I	582.167	2.00345	0.281993	7.10463	1.21e-12	3.76e-11	UP
SNRPB	13418.8	1.08657	0.152986	7.10246	1.23e-12	3.82e-11	UP
KIAA1462	1669.01	-2.16095	0.304308	-7.10119	1.24e-12	3.85e-11	DOWN
RP11-703I16.1	46.7424	-1.97636	0.278318	-7.10108	1.24e-12	3.85e-11	DOWN
CD302	151.411	-1.67515	0.235973	-7.09889	1.26e-12	3.91e-11	DOWN
XRCC3	1006.62	1.13836	0.160396	7.09721	1.27e-12	3.95e-11	UP
ESR1	324.076	-2.92999	0.412913	-7.0959	1.29e-12	3.98e-11	DOWN
SIX4	548.011	1.62269	0.228953	7.08744	1.37e-12	4.22e-11	UP
FZD2	554.556	2.02563	0.28588	7.08559	1.38e-12	4.27e-11	UP
SASS6	483.258	1.17597	0.16608	7.08073	1.43e-12	4.42e-11	UP
DDX11-AS1	68.0364	1.59729	0.225587	7.0806	1.44e-12	4.42e-11	UP
RP3-523C21.2	1.96953	-3.32117	0.469342	-7.07623	1.48e-12	4.56e-11	DOWN
SAC3D1	882.408	1.51048	0.213538	7.07356	1.51e-12	4.64e-11	UP
BVES	328.255	-2.87381	0.406341	-7.0724	1.52e-12	4.67e-11	DOWN
WBSCR17	197.292	-3.57008	0.504785	-7.07249	1.52e-12	4.67e-11	DOWN
KIAA0513	912.654	-1.71405	0.242465	-7.06928	1.56e-12	4.78e-11	DOWN
DENND2A	442.724	-2.09897	0.29704	-7.06629	1.59e-12	4.88e-11	DOWN
RP11-182J1.1	2.19479	-2.04609	0.289814	-7.06003	1.66e-12	5.09e-11	DOWN
TMEM245	3235.83	-1.05245	0.149093	-7.05898	1.68e-12	5.13e-11	DOWN
RUNX1T1	150.466	-2.69218	0.381481	-7.05719	1.7e-12	5.19e-11	DOWN
STRIP2	298.664	2.23108	0.316198	7.05595	1.71e-12	5.23e-11	UP
SMIM10	254.626	-1.91265	0.271078	-7.0557	1.72e-12	5.23e-11	DOWN
ZNF252P-AS1	26.6701	2.133	0.302313	7.05562	1.72e-12	5.23e-11	UP
SYNC	108.484	-2.58259	0.366095	-7.05442	1.73e-12	5.27e-11	DOWN
ROR1	163.196	-2.74147	0.388652	-7.0538	1.74e-12	5.29e-11	DOWN
TNNT2	335.482	-3.10177	0.439738	-7.05367	1.74e-12	5.29e-11	DOWN
C1QTNF2	75.814	-2.19845	0.311683	-7.05349	1.74e-12	5.3e-11	DOWN
SMYD2	2369.65	1.07577	0.152546	7.05214	1.76e-12	5.34e-11	UP
OXLD1	1495.93	1.20247	0.170565	7.0499	1.79e-12	5.43e-11	UP
AC024937.6	40.6621	2.41111	0.342041	7.04917	1.8e-12	5.45e-11	UP
EBF2	47.05	-2.65247	0.376324	-7.04837	1.81e-12	5.48e-11	DOWN
RP11-49G2.3	3.31563	-3.26957	0.464	-7.04649	1.83e-12	5.55e-11	DOWN
MSLN	1021.6	4.62028	0.655829	7.04494	1.86e-12	5.6e-11	UP
GPR146	32.54	-1.63338	0.231863	-7.04461	1.86e-12	5.61e-11	DOWN
GINS2	1075.29	1.53717	0.218375	7.03911	1.93e-12	5.82e-11	UP
CD55	5549.14	-1.95891	0.278297	-7.03894	1.94e-12	5.83e-11	DOWN
MAGI2-AS3	338.565	-2.20295	0.313232	-7.03296	2.02e-12	6.08e-11	DOWN
RP11-627G18.1	2.37748	-3.06134	0.435303	-7.03266	2.03e-12	6.08e-11	DOWN
C22orf39	1089.94	-1.02299	0.145487	-7.03148	2.04e-12	6.13e-11	DOWN
DHCR7	3826	1.46832	0.20887	7.02984	2.07e-12	6.2e-11	UP
C1orf95	190.542	-3.92887	0.559245	-7.02531	2.14e-12	6.39e-11	DOWN
WDR4	1048.46	1.09822	0.156337	7.02468	2.15e-12	6.42e-11	UP
FAIM2	107.224	-3.48818	0.496651	-7.02341	2.17e-12	6.46e-11	DOWN
PCAT6	348.754	1.84777	0.26323	7.01961	2.22e-12	6.63e-11	UP
AC079630.4	10.5181	-2.69138	0.383407	-7.01964	2.22e-12	6.63e-11	DOWN
RP11-262D11.2	13.9059	-1.88563	0.268826	-7.0143	2.31e-12	6.88e-11	DOWN
TBC1D31	506.883	1.04098	0.14842	7.01376	2.32e-12	6.9e-11	UP
POP7	1817.12	1.01424	0.144623	7.013	2.33e-12	6.93e-11	UP
SPG20	2251.67	-1.22233	0.174389	-7.00922	2.4e-12	7.11e-11	DOWN
FGF2	291.287	-2.81513	0.40173	-7.00751	2.43e-12	7.19e-11	DOWN
TGM1	592.732	3.56048	0.508206	7.00597	2.45e-12	7.26e-11	UP
GPIHBP1	93.8949	-2.87735	0.410716	-7.00571	2.46e-12	7.27e-11	DOWN
CTD-2270F17.1	1.77748	-3.8624	0.551452	-7.00407	2.49e-12	7.35e-11	DOWN
SCN4B	169.261	-2.30152	0.328614	-7.0037	2.49e-12	7.36e-11	DOWN
APOC1	2031.43	2.44213	0.348732	7.0029	2.51e-12	7.4e-11	UP
CA5B	279.742	-1.03602	0.147946	-7.00267	2.51e-12	7.41e-11	DOWN
NUDT5	3533.6	1.02443	0.146304	7.00209	2.52e-12	7.43e-11	UP
PLXNA1	6788.33	1.32177	0.188921	6.99638	2.63e-12	7.73e-11	UP
DUSP5	4540.14	-2.23918	0.320164	-6.99385	2.67e-12	7.87e-11	DOWN
HOXC9	165.807	3.54443	0.506988	6.99116	2.73e-12	8.01e-11	UP
CTC-463A16.1	36.5386	-1.39983	0.20023	-6.99109	2.73e-12	8.01e-11	DOWN
ISG15	9225.98	2.42334	0.346643	6.99089	2.73e-12	8.02e-11	UP
RP11-598F7.5	37.3167	2.45133	0.350654	6.99073	2.73e-12	8.02e-11	UP
DEPDC1	794.277	1.82386	0.261175	6.9833	2.88e-12	8.45e-11	UP
TGFBR3	2312.61	-2.21189	0.316767	-6.98271	2.9e-12	8.48e-11	DOWN
ARHGEF17	1748	-1.38334	0.19815	-6.98129	2.92e-12	8.56e-11	DOWN
HAND2	220.184	-3.41999	0.489927	-6.98062	2.94e-12	8.58e-11	DOWN
C6orf223	149.099	3.83974	0.550129	6.97971	2.96e-12	8.63e-11	UP
EEF1A1	163867	-1.00842	0.144567	-6.97543	3.05e-12	8.88e-11	DOWN
PFDN6	2500.06	1.10505	0.158421	6.97538	3.05e-12	8.88e-11	UP
GJC2	83.7141	-1.97134	0.282632	-6.97493	3.06e-12	8.9e-11	DOWN
RP11-307B6.3	10.2712	-2.83493	0.406627	-6.97183	3.13e-12	9.09e-11	DOWN
RP11-496H1.1	102.402	2.36066	0.338712	6.96953	3.18e-12	9.23e-11	UP
HOXC6	181.674	3.0443	0.436812	6.96935	3.18e-12	9.23e-11	UP
CEP131	1791	1.2827	0.184065	6.96871	3.2e-12	9.27e-11	UP
CLDN9	220.663	4.02057	0.577007	6.96797	3.22e-12	9.31e-11	UP
RP11-564D11.3	29.5254	2.5727	0.369309	6.96625	3.26e-12	9.42e-11	UP
RAB30	483.539	-1.57772	0.226503	-6.96558	3.27e-12	9.45e-11	DOWN
RP11-435O5.6	14.8237	3.1513	0.452585	6.96289	3.33e-12	9.62e-11	UP
CHAF1A	2157.72	1.07229	0.154056	6.96035	3.39e-12	9.79e-11	UP
TARSL2	393.707	-1.10636	0.158965	-6.95978	3.41e-12	9.82e-11	DOWN
ZHX1-C8orf76	70.0947	1.30591	0.187657	6.95904	3.43e-12	9.87e-11	UP
B3GNT4	117.817	2.22895	0.320344	6.95799	3.45e-12	9.93e-11	UP
MFSD3	1288.17	1.44595	0.207845	6.95688	3.48e-12	1e-10	UP
RFC2	2089.69	1.01651	0.146127	6.9563	3.49e-12	1e-10	UP
CYGB	1118.99	-1.92592	0.276893	-6.95546	3.51e-12	1.01e-10	DOWN
RP11-141M3.6	164.848	3.98847	0.573673	6.95252	3.59e-12	1.03e-10	UP
TMEM252	27.9588	-5.12519	0.737239	-6.95188	3.6e-12	1.03e-10	DOWN
WDFY3-AS2	79.1831	-1.51095	0.217499	-6.94695	3.73e-12	1.07e-10	DOWN
TMC6	5443.03	1.3379	0.192629	6.94548	3.77e-12	1.08e-10	UP
RP11-190J1.3	18.0287	4.33945	0.625272	6.9401	3.92e-12	1.12e-10	UP
KLHDC7B	5433.43	3.79926	0.547919	6.93398	4.09e-12	1.17e-10	UP
CLDN5	761.795	-2.46019	0.3548	-6.93403	4.09e-12	1.17e-10	DOWN
FAM110A	2199.93	1.24	0.178847	6.93331	4.11e-12	1.17e-10	UP
DARS2	1707.82	1.19166	0.171961	6.92983	4.21e-12	1.2e-10	UP
ASB1	945.449	-1.07642	0.155358	-6.92861	4.25e-12	1.21e-10	DOWN
LOH12CR2	35.2271	-1.35063	0.194997	-6.9264	4.32e-12	1.23e-10	DOWN
DYSF	1381.05	-1.83772	0.265334	-6.92607	4.33e-12	1.23e-10	DOWN
TMEM180	491.922	1.2862	0.18579	6.92287	4.43e-12	1.26e-10	UP
ARHGAP24	331.189	-2.00196	0.28925	-6.92122	4.48e-12	1.27e-10	DOWN
CASP6	1232.66	1.01897	0.147305	6.91739	4.6e-12	1.3e-10	UP
MITF	377.047	-2.07361	0.300021	-6.91153	4.79e-12	1.35e-10	DOWN
HCN3	490.127	1.53095	0.221513	6.91133	4.8e-12	1.36e-10	UP
SPRR1B	2513.74	4.85067	0.702373	6.90612	4.98e-12	1.4e-10	UP
CTD-2583A14.11	213.065	1.45589	0.210851	6.90486	5.03e-12	1.42e-10	UP
LRRC7	35.1724	-1.85539	0.268769	-6.9033	5.08e-12	1.43e-10	DOWN
RIBC2	163.771	1.86073	0.269605	6.90169	5.14e-12	1.45e-10	UP
CPXM2	1035.3	-2.97753	0.431465	-6.90096	5.17e-12	1.45e-10	DOWN
MAFG-AS1	275.495	1.88006	0.272487	6.89963	5.21e-12	1.46e-10	UP
CENPF	4065.81	1.65956	0.240538	6.89935	5.22e-12	1.47e-10	UP
HAVCR1	85.4888	5.59795	0.811759	6.89607	5.35e-12	1.5e-10	UP
KLHDC1	79.7204	-1.49517	0.216855	-6.89478	5.39e-12	1.51e-10	DOWN
SAPCD1	33.0447	2.13424	0.309694	6.89146	5.52e-12	1.55e-10	UP
WDR66	557.259	3.02589	0.439123	6.89076	5.55e-12	1.55e-10	UP
PRAME	715.468	5.73125	0.831885	6.88947	5.6e-12	1.56e-10	UP
C1orf112	688.17	1.53448	0.222759	6.88851	5.64e-12	1.57e-10	UP
SLC50A1	3878.45	1.22173	0.177382	6.88758	5.67e-12	1.58e-10	UP
HMGN2P19	2.8616	-3.34523	0.485698	-6.88747	5.68e-12	1.58e-10	DOWN
SLC29A2	789.463	1.82363	0.264815	6.88643	5.72e-12	1.59e-10	UP
WDR90	1859.72	1.25361	0.182184	6.88105	5.94e-12	1.65e-10	UP
GNG11	987.308	-1.83545	0.266768	-6.88034	5.97e-12	1.66e-10	DOWN
ATAD2	2812.34	1.40163	0.20377	6.87851	6.05e-12	1.68e-10	UP
TRIM59	539.7	1.17714	0.171274	6.87285	6.29e-12	1.75e-10	UP
RP11-634H22.1	36.051	1.70836	0.248601	6.87191	6.33e-12	1.76e-10	UP
RPS6KA5	662.353	-1.58876	0.23129	-6.86911	6.46e-12	1.79e-10	DOWN
CXCL11	1025.16	3.98686	0.580534	6.86758	6.53e-12	1.8e-10	UP
RBL1	904.155	1.16518	0.169663	6.86761	6.53e-12	1.8e-10	UP
RP11-93H24.3	50.1559	1.64228	0.239132	6.86768	6.53e-12	1.8e-10	UP
QRFP	29.1497	-1.72147	0.250692	-6.86687	6.56e-12	1.81e-10	DOWN
ZNF92	503.103	1.24221	0.180925	6.86589	6.61e-12	1.82e-10	UP
MYH16	44.4716	3.1667	0.461239	6.86564	6.62e-12	1.82e-10	UP
TMEM100	78.0214	-3.19089	0.464921	-6.8633	6.73e-12	1.85e-10	DOWN
AARD	62.0128	-4.13952	0.603254	-6.86198	6.79e-12	1.87e-10	DOWN
IQCJ-SCHIP1	120.571	-1.64798	0.24026	-6.85917	6.93e-12	1.9e-10	DOWN
C1orf159	1243.47	1.22777	0.179029	6.85795	6.99e-12	1.92e-10	UP
RP11-394O4.5	546.639	-2.9814	0.434781	-6.85723	7.02e-12	1.92e-10	DOWN
RP11-324I22.3	15.4304	-1.59772	0.233028	-6.85635	7.06e-12	1.93e-10	DOWN
ADH1B	826.912	-4.5364	0.661745	-6.85521	7.12e-12	1.95e-10	DOWN
RP11-544I20.2	15.4684	1.79857	0.262403	6.85421	7.17e-12	1.96e-10	UP
EPHA7	293.112	-3.30583	0.482501	-6.85146	7.31e-12	2e-10	DOWN
DUXAP8	305.864	2.76868	0.404155	6.85054	7.36e-12	2.01e-10	UP
ARHGEF37	562.468	-2.01094	0.29363	-6.84855	7.46e-12	2.03e-10	DOWN
RP11-480I12.5	522.501	2.40739	0.351587	6.84721	7.53e-12	2.05e-10	UP
GAL	156.67	4.58257	0.669322	6.84659	7.56e-12	2.05e-10	UP
CTD-2023N9.1	0.767192	-4.13389	0.604219	-6.84171	7.83e-12	2.12e-10	DOWN
TMEM55A	364.117	-1.43276	0.209456	-6.84036	7.9e-12	2.14e-10	DOWN
CTC-510F12.7	16.6115	-2.33806	0.341851	-6.83941	7.95e-12	2.16e-10	DOWN
TMUB1	3099	1.03769	0.151775	6.83703	8.09e-12	2.19e-10	UP
RP11-863P13.4	6.61069	-3.35198	0.490284	-6.83682	8.1e-12	2.19e-10	DOWN
MATN3	213.961	2.16546	0.316762	6.83624	8.13e-12	2.2e-10	UP
CCSAP	834.803	1.17224	0.171499	6.83523	8.19e-12	2.21e-10	UP
PDRG1	1535.21	1.0359	0.151588	6.83367	8.28e-12	2.23e-10	UP
THAP2	306.211	-1.06631	0.156064	-6.83256	8.34e-12	2.25e-10	DOWN
RHPN1-AS1	69.9188	1.91153	0.279819	6.83132	8.41e-12	2.27e-10	UP
DGKG	183.628	-2.57666	0.377374	-6.82787	8.62e-12	2.32e-10	DOWN
SOX4	10948.8	1.66133	0.243334	6.82738	8.65e-12	2.32e-10	UP
PRC1	2716.89	1.48403	0.217413	6.82588	8.74e-12	2.35e-10	UP
COL19A1	50.3416	-4.26512	0.624885	-6.82545	8.76e-12	2.35e-10	DOWN
MAPT	249.465	-2.7936	0.409328	-6.82484	8.8e-12	2.36e-10	DOWN
MMRN1	184.218	-3.11164	0.455949	-6.82454	8.82e-12	2.36e-10	DOWN
FAM171A2	290.732	2.45957	0.360418	6.8242	8.84e-12	2.37e-10	UP
PTH1R	69.994	-2.43005	0.356104	-6.82399	8.85e-12	2.37e-10	DOWN
ERVH48-1	232.045	4.89134	0.71687	6.82319	8.9e-12	2.38e-10	UP
KIF13A	2837.76	-1.26562	0.185515	-6.8222	8.97e-12	2.39e-10	DOWN
FAM212B	387.423	-1.27769	0.187282	-6.82228	8.96e-12	2.39e-10	DOWN
RHOJ	442.629	-1.92974	0.28291	-6.82104	9.04e-12	2.41e-10	DOWN
MIOX	26.9951	3.69964	0.542581	6.81859	9.19e-12	2.45e-10	UP
ADAMTS8	150.799	-3.11073	0.456282	-6.81757	9.26e-12	2.47e-10	DOWN
RP11-535A5.1	2.86719	-4.01233	0.588703	-6.81553	9.39e-12	2.5e-10	DOWN
RP11-473E2.4	2.11621	-3.31206	0.485986	-6.81512	9.42e-12	2.5e-10	DOWN
CHRM3	337.228	-3.29175	0.483166	-6.81287	9.57e-12	2.54e-10	DOWN
LINC00670	1.40655	-3.39676	0.498778	-6.81018	9.75e-12	2.59e-10	DOWN
ST6GALNAC6	1921.62	-1.18118	0.173493	-6.80821	9.88e-12	2.62e-10	DOWN
KLHL21	2632.64	-1.28459	0.188738	-6.80623	1e-11	2.65e-10	DOWN
ST3GAL3	497.092	-1.17222	0.172236	-6.80589	1e-11	2.66e-10	DOWN
FAM227A	162.814	1.9624	0.288467	6.80287	1.03e-11	2.71e-10	UP
LINC01296	45.6986	3.08513	0.453517	6.80268	1.03e-11	2.71e-10	UP
EN2	56.4614	4.18116	0.614771	6.80116	1.04e-11	2.74e-10	UP
TEF	1205.58	-1.19989	0.176427	-6.80104	1.04e-11	2.74e-10	DOWN
ZIC2	253.383	3.75345	0.551929	6.80061	1.04e-11	2.75e-10	UP
RP11-404P21.9	12.1644	-2.73618	0.402347	-6.80054	1.04e-11	2.75e-10	DOWN
FCRLB	906.019	3.05342	0.44901	6.80033	1.04e-11	2.75e-10	UP
PLSCR4	453.345	-2.02822	0.298511	-6.79446	1.09e-11	2.86e-10	DOWN
LIME1	211.935	1.5017	0.221021	6.79436	1.09e-11	2.86e-10	UP
STAM-AS1	20.619	1.87425	0.275858	6.79425	1.09e-11	2.86e-10	UP
ABCB1	133.428	-1.92108	0.282772	-6.79373	1.09e-11	2.86e-10	DOWN
RP11-57A19.2	49.6734	3.58742	0.528084	6.79327	1.1e-11	2.87e-10	UP
CTAG2	362.138	8.30391	1.22243	6.79297	1.1e-11	2.87e-10	UP
TMEM145	71.1903	3.00963	0.443371	6.78806	1.14e-11	2.97e-10	UP
RASGRP2	315.868	-2.44011	0.359658	-6.78453	1.16e-11	3.04e-10	DOWN
MFI2-AS1	167.136	1.73161	0.255272	6.7834	1.17e-11	3.06e-10	UP
FAM110D	86.6348	-1.93133	0.284731	-6.78301	1.18e-11	3.07e-10	DOWN
RP11-190C22.8	8.05196	2.83151	0.417502	6.78204	1.18e-11	3.09e-10	UP
HAGHL	230.169	1.94688	0.287097	6.78126	1.19e-11	3.1e-10	UP
FBXO32	3512.86	-2.04269	0.30134	-6.7787	1.21e-11	3.16e-10	DOWN
PCDH18	447.081	-2.06982	0.305382	-6.77782	1.22e-11	3.17e-10	DOWN
NT5DC4	18.3584	2.57835	0.38042	6.77763	1.22e-11	3.17e-10	UP
RPS20P33	20.4251	1.7455	0.257592	6.77623	1.23e-11	3.2e-10	UP
PLEKHG4B	480.797	3.90721	0.576623	6.77603	1.24e-11	3.21e-10	UP
RBMS3	398.702	-2.27501	0.335892	-6.77302	1.26e-11	3.27e-10	DOWN
RP11-195B17.1	11.6959	-1.37806	0.203477	-6.77254	1.27e-11	3.28e-10	DOWN
RP11-967K21.1	81.4714	-1.32578	0.195874	-6.76854	1.3e-11	3.37e-10	DOWN
KIAA1841	794.52	1.11817	0.165266	6.7659	1.32e-11	3.43e-10	UP
CTD-3222D19.12	59.853	1.52131	0.224876	6.76512	1.33e-11	3.44e-10	UP
CCNYL2	104.521	5.06972	0.749556	6.76364	1.35e-11	3.47e-10	UP
PRSS1	110.217	6.11792	0.904746	6.76203	1.36e-11	3.51e-10	UP
RP11-805I24.4	0.857405	-3.80716	0.563044	-6.76175	1.36e-11	3.51e-10	DOWN
E2F1	1676.39	1.78462	0.26415	6.75606	1.42e-11	3.65e-10	UP
HLX-AS1	1.46173	-3.35416	0.496463	-6.75611	1.42e-11	3.65e-10	DOWN
FAM46A	1398.41	-1.54433	0.228613	-6.75524	1.43e-11	3.67e-10	DOWN
RP11-152N13.16	87.9352	1.57259	0.23301	6.74903	1.49e-11	3.82e-10	UP
AC069513.4	13.2374	2.44556	0.362409	6.74806	1.5e-11	3.84e-10	UP
RP11-493L12.3	17.9115	3.9376	0.583692	6.74603	1.52e-11	3.9e-10	UP
RP11-514D23.2	2.88944	-3.8223	0.566621	-6.74578	1.52e-11	3.9e-10	DOWN
APBB1	677.269	-2.13307	0.31636	-6.74256	1.56e-11	3.98e-10	DOWN
SSBP2	736.992	-1.5638	0.231944	-6.74213	1.56e-11	3.99e-10	DOWN
PKD2	1127.63	-1.19682	0.177518	-6.74198	1.56e-11	3.99e-10	DOWN
RASL11A	375.16	-2.25177	0.334001	-6.7418	1.56e-11	3.99e-10	DOWN
RERGL	28.7323	-3.49326	0.518145	-6.74187	1.56e-11	3.99e-10	DOWN
RUVBL1	3599.83	1.00075	0.148497	6.73921	1.59e-11	4.06e-10	UP
KCND3	356.606	-2.83975	0.421377	-6.73923	1.59e-11	4.06e-10	DOWN
RP11-554A11.4	40.6903	-2.80567	0.416355	-6.73865	1.6e-11	4.07e-10	DOWN
C1orf53	121.373	1.50498	0.223386	6.73713	1.62e-11	4.11e-10	UP
CASP12	7.45917	-2.2557	0.334878	-6.73589	1.63e-11	4.14e-10	DOWN
MAPKBP1	1292.8	-1.08083	0.160467	-6.73551	1.63e-11	4.15e-10	DOWN
PDLIM7	4368.15	-1.77747	0.263922	-6.73482	1.64e-11	4.17e-10	DOWN
SYPL2	68.482	-2.68456	0.398642	-6.73426	1.65e-11	4.18e-10	DOWN
AC007403.2	1.03714	-3.97728	0.590614	-6.73415	1.65e-11	4.18e-10	DOWN
TRPC4	49.0922	-2.0142	0.29942	-6.727	1.73e-11	4.39e-10	DOWN
S1PR1	719.407	-1.92655	0.286407	-6.72661	1.74e-11	4.4e-10	DOWN
ZEB2	1137.89	-2.03463	0.302712	-6.72135	1.8e-11	4.56e-10	DOWN
RP11-441F2.5	1.92273	-4.01363	0.59716	-6.7212	1.8e-11	4.56e-10	DOWN
SNORD104	98.3292	1.912	0.28448	6.72103	1.8e-11	4.56e-10	UP
B3GAT2	34.4883	-1.84162	0.274234	-6.7155	1.87e-11	4.72e-10	DOWN
PLA2G15	1711.8	1.10943	0.165218	6.71494	1.88e-11	4.74e-10	UP
LINC01154	1.388	-4.24765	0.632625	-6.71433	1.89e-11	4.75e-10	DOWN
GGH	2232.9	1.76863	0.263439	6.71362	1.9e-11	4.77e-10	UP
TMEM44	1016.02	1.2072	0.179835	6.71282	1.91e-11	4.8e-10	UP
RP11-616M22.12	4.51069	-3.16823	0.471979	-6.71266	1.91e-11	4.8e-10	DOWN
RP11-333I13.1	7.33245	-1.65703	0.246868	-6.71221	1.92e-11	4.81e-10	DOWN
HECTD2	532.897	-1.22388	0.182363	-6.71126	1.93e-11	4.84e-10	DOWN
GPR19	64.2617	2.1665	0.322892	6.70968	1.95e-11	4.89e-10	UP
SGOL2	559.381	1.31478	0.195973	6.70898	1.96e-11	4.9e-10	UP
ZNF724P	75.2025	1.97502	0.294381	6.70908	1.96e-11	4.9e-10	UP
PTPN21	859.553	-1.26972	0.189265	-6.70871	1.96e-11	4.91e-10	DOWN
EDNRA	616.997	-2.08339	0.310546	-6.70879	1.96e-11	4.91e-10	DOWN
JUND	9017.84	-1.41592	0.211093	-6.70758	1.98e-11	4.94e-10	DOWN
ADCYAP1R1	29.4144	-3.07745	0.458902	-6.70611	2e-11	4.99e-10	DOWN
ABRA	5.81948	-2.85807	0.426275	-6.70475	2.02e-11	5.03e-10	DOWN
RHBDF2	2438.79	1.21598	0.181377	6.70415	2.03e-11	5.05e-10	UP
SLC24A2	48.9036	2.9598	0.441573	6.70286	2.04e-11	5.09e-10	UP
MAOB	712.093	-3.28609	0.490377	-6.70114	2.07e-11	5.15e-10	DOWN
FAM102B	1360.41	-1.44631	0.215962	-6.69708	2.13e-11	5.29e-10	DOWN
CACNB4	132.382	-2.85582	0.426466	-6.69647	2.14e-11	5.31e-10	DOWN
RP11-514D23.3	12.1208	-2.52507	0.377223	-6.69385	2.17e-11	5.39e-10	DOWN
TMEM132C	40.862	-4.40439	0.658191	-6.69167	2.21e-11	5.47e-10	DOWN
BIN1	1637.92	-2.22209	0.332395	-6.6851	2.31e-11	5.71e-10	DOWN
ADCY9	914.763	-1.53001	0.228866	-6.68517	2.31e-11	5.71e-10	DOWN
DSCC1	496.097	1.46412	0.21915	6.68094	2.37e-11	5.87e-10	UP
RANBP1	4948.79	1.08259	0.162071	6.67976	2.39e-11	5.92e-10	UP
SCUBE1	101.357	-2.60132	0.389806	-6.67338	2.5e-11	6.17e-10	DOWN
RP11-710C12.1	18.4848	-2.73036	0.409162	-6.67306	2.51e-11	6.18e-10	DOWN
RNF139-AS1	117.663	1.28229	0.192166	6.6728	2.51e-11	6.19e-10	UP
RP11-381E24.4	3.87841	3.63521	0.544798	6.67259	2.51e-11	6.19e-10	UP
POLA2	1429.67	1.0347	0.155076	6.67224	2.52e-11	6.2e-10	UP
DUSP8	324.04	-1.97793	0.296513	-6.67064	2.55e-11	6.26e-10	DOWN
IL17B	14.5196	-1.88714	0.282932	-6.66995	2.56e-11	6.29e-10	DOWN
SIM2	709.282	2.05836	0.308627	6.66943	2.57e-11	6.3e-10	UP
MGARP	13.2272	-2.38241	0.35734	-6.66706	2.61e-11	6.4e-10	DOWN
AGTR1	105.522	-3.44002	0.516209	-6.664	2.66e-11	6.53e-10	DOWN
GPER1	94.2404	-2.10248	0.315571	-6.66245	2.69e-11	6.59e-10	DOWN
RP11-155O18.6	14.7454	1.95687	0.293734	6.66205	2.7e-11	6.6e-10	UP
HSPB2	39.6312	-2.34105	0.351654	-6.65725	2.79e-11	6.81e-10	DOWN
RP11-169F17.1	149.413	6.02465	0.90526	6.65516	2.83e-11	6.9e-10	UP
CTB-47B11.3	12.1492	-2.45382	0.368998	-6.64995	2.93e-11	7.14e-10	DOWN
PDXK	9634.84	1.11118	0.16711	6.64938	2.94e-11	7.17e-10	UP
RP11-690D19.3	118.014	-1.64135	0.246868	-6.6487	2.96e-11	7.2e-10	DOWN
ASTL	28.7947	-3.09265	0.465355	-6.64578	3.02e-11	7.34e-10	DOWN
TMEM8B	896.225	-1.1506	0.173192	-6.64347	3.06e-11	7.45e-10	DOWN
PPP1R15A	7331.56	-1.41264	0.212675	-6.64223	3.09e-11	7.5e-10	DOWN
CD3EAP	449.367	1.1612	0.174828	6.64194	3.1e-11	7.51e-10	UP
C1QTNF9	5.86453	-3.60895	0.543528	-6.63986	3.14e-11	7.61e-10	DOWN
A2M-AS1	45.4305	-1.54929	0.233338	-6.63966	3.14e-11	7.62e-10	DOWN
MYT1	278.671	4.54077	0.684642	6.63233	3.3e-11	8e-10	UP
CENPL	424.478	1.1601	0.174934	6.63166	3.32e-11	8.03e-10	UP
ANGPTL7	26.1185	-4.10601	0.619162	-6.63156	3.32e-11	8.03e-10	DOWN
GALNT15	234.162	-2.81182	0.424037	-6.63106	3.33e-11	8.05e-10	DOWN
IL13	4.43859	-3.28862	0.495967	-6.63073	3.34e-11	8.06e-10	DOWN
HOXB6	684.44	2.62897	0.396515	6.63019	3.35e-11	8.08e-10	UP
DIAPH3	581.288	1.75329	0.264438	6.63025	3.35e-11	8.08e-10	UP
CTB-109A12.1	21.4944	-2.96043	0.44651	-6.63016	3.35e-11	8.08e-10	DOWN
RP11-196G18.3	28.1154	2.29422	0.346234	6.62622	3.44e-11	8.28e-10	UP
PSG5	30.4095	5.99996	0.905736	6.6244	3.49e-11	8.37e-10	UP
RP11-554E23.4	13.6383	1.74545	0.263488	6.62443	3.49e-11	8.37e-10	UP
LRFN5	108.029	-3.32445	0.50199	-6.62255	3.53e-11	8.47e-10	DOWN
LYPLAL1-AS1	3.97408	-2.88938	0.436335	-6.62192	3.55e-11	8.49e-10	DOWN
KIAA0408	3.95135	-4.02337	0.607576	-6.622	3.54e-11	8.49e-10	DOWN
ANK2	375.38	-3.01971	0.456027	-6.62177	3.55e-11	8.5e-10	DOWN
C1orf21	2702.33	-1.38126	0.20876	-6.61649	3.68e-11	8.79e-10	DOWN
PABPC1P4	48.5696	-1.9337	0.292383	-6.6136	3.75e-11	8.96e-10	DOWN
ZDHHC23	517.951	1.3982	0.211443	6.61265	3.78e-11	9.01e-10	UP
MAPRE2	1330.32	-1.63053	0.246594	-6.61218	3.79e-11	9.03e-10	DOWN
PNMA1	1609.21	-1.61907	0.244873	-6.61185	3.8e-11	9.04e-10	DOWN
HIST1H2BK	1207.42	1.95363	0.295471	6.61191	3.79e-11	9.04e-10	UP
AC012065.5	1.28263	-2.51972	0.38131	-6.60807	3.89e-11	9.27e-10	DOWN
AC015849.16	71.9457	3.11239	0.471007	6.60795	3.9e-11	9.27e-10	UP
ABCB9	440.584	1.15922	0.175478	6.60607	3.95e-11	9.37e-10	UP
SAMD15	58.0237	1.52282	0.230538	6.60553	3.96e-11	9.4e-10	UP
MMP13	1434.06	3.95982	0.599696	6.60305	4.03e-11	9.55e-10	UP
SLC9A9	406.885	-1.96857	0.298135	-6.60295	4.03e-11	9.55e-10	DOWN
AC007392.4	1.4214	-4.09242	0.619812	-6.60269	4.04e-11	9.56e-10	DOWN
SYNE1-AS1	0.636055	-3.5844	0.54302	-6.60086	4.09e-11	9.67e-10	DOWN
RP11-506B6.6	8.29829	-2.5086	0.380119	-6.59951	4.13e-11	9.75e-10	DOWN
SNHG12	1197.47	1.18956	0.180255	6.59929	4.13e-11	9.76e-10	UP
TSPAN2	631.343	-2.49585	0.378205	-6.59921	4.13e-11	9.76e-10	DOWN
SLIT2	405.631	-2.83813	0.43008	-6.59907	4.14e-11	9.76e-10	DOWN
CTB-25B13.5	15.7935	-1.68025	0.254826	-6.59373	4.29e-11	1.01e-09	DOWN
RP11-88I18.3	2.70164	-4.66337	0.707318	-6.59303	4.31e-11	1.01e-09	DOWN
DUSP19	166.915	-1.27703	0.193735	-6.59164	4.35e-11	1.02e-09	DOWN
RP11-309L24.2	1.12341	-4.64872	0.705293	-6.59118	4.36e-11	1.03e-09	DOWN
HIST1H1E	46.515	2.5231	0.38287	6.58996	4.4e-11	1.03e-09	UP
POU6F1	266.398	-1.43731	0.218161	-6.58828	4.45e-11	1.04e-09	DOWN
AL133493.2	68.0866	3.24246	0.492349	6.5857	4.53e-11	1.06e-09	UP
DTYMK	1856.74	1.10352	0.167694	6.58054	4.69e-11	1.1e-09	UP
RP11-155G14.6	19.5596	2.63227	0.400089	6.5792	4.73e-11	1.1e-09	UP
KLK5	308.319	7.00623	1.06495	6.57895	4.74e-11	1.11e-09	UP
CTD-3065J16.9	91.3913	1.36104	0.206876	6.57904	4.73e-11	1.11e-09	UP
CDCA7	1083.01	1.85496	0.281986	6.5782	4.76e-11	1.11e-09	UP
RNF144A-AS1	76.1723	2.49993	0.380057	6.57778	4.78e-11	1.11e-09	UP
SEMA3G	402.655	-1.77568	0.269978	-6.57713	4.8e-11	1.12e-09	DOWN
PTCH2	81.1011	-1.71122	0.260206	-6.57639	4.82e-11	1.12e-09	DOWN
DYNC1I1	390.203	-2.46368	0.374702	-6.57505	4.86e-11	1.13e-09	DOWN
EEF1A1P12	65.8224	-1.37333	0.208968	-6.57197	4.97e-11	1.15e-09	DOWN
POC1A	925.311	1.34145	0.204152	6.57085	5e-11	1.16e-09	UP
SGCG	20.2688	-3.94548	0.600454	-6.57082	5e-11	1.16e-09	DOWN
TACR3	23.4582	-4.46823	0.680076	-6.57019	5.03e-11	1.16e-09	DOWN
KLHL17	660.657	1.35951	0.207008	6.56741	5.12e-11	1.18e-09	UP
INMT	231.061	-2.2145	0.337256	-6.56622	5.16e-11	1.19e-09	DOWN
HP09025	2.06698	-2.76733	0.421495	-6.5655	5.19e-11	1.2e-09	DOWN
MRPS26	3501.31	1.01615	0.15478	6.56514	5.2e-11	1.2e-09	UP
VIT	91.3098	-4.64263	0.70723	-6.56453	5.22e-11	1.2e-09	DOWN
GABARAPL1	2634.44	-1.20777	0.183989	-6.56439	5.22e-11	1.2e-09	DOWN
RND1	242.502	-2.09438	0.319216	-6.561	5.34e-11	1.23e-09	DOWN
RP11-197N18.2	32.6181	1.4573	0.222124	6.56078	5.35e-11	1.23e-09	UP
CCR3	58.1417	2.99552	0.456706	6.55897	5.42e-11	1.25e-09	UP
SLC25A12	1070.49	-1.00542	0.153306	-6.55825	5.44e-11	1.25e-09	DOWN
KAT6B	1239.59	-1.10016	0.167755	-6.55813	5.45e-11	1.25e-09	DOWN
SBSN	1169.56	4.61569	0.704132	6.55515	5.56e-11	1.28e-09	UP
RGS20	166.529	2.97716	0.454182	6.55499	5.56e-11	1.28e-09	UP
RP4-635E18.6	28.2448	1.5493	0.236379	6.55429	5.59e-11	1.28e-09	UP
SAGE1	61.2766	8.29398	1.26589	6.55192	5.68e-11	1.3e-09	UP
DNASE1L2	76.6665	2.08077	0.31781	6.54723	5.86e-11	1.34e-09	UP
DCST1	33.9255	1.91172	0.292046	6.54597	5.91e-11	1.35e-09	UP
NCAPG2	1689.87	1.33645	0.204214	6.54436	5.98e-11	1.36e-09	UP
RP11-77P6.2	51.5065	1.49305	0.228189	6.54305	6.03e-11	1.38e-09	UP
KIF24	323.052	1.46532	0.223966	6.54258	6.05e-11	1.38e-09	UP
SLC51B	16.2806	-2.42029	0.369934	-6.54249	6.05e-11	1.38e-09	DOWN
RP11-55K13.1	36.1209	2.10669	0.322015	6.54221	6.06e-11	1.38e-09	UP
CALB1	381.979	4.61099	0.705396	6.53675	6.29e-11	1.43e-09	UP
RP11-421M1.8	22.5477	1.57461	0.240883	6.53683	6.28e-11	1.43e-09	UP
RP11-968O1.5	9.14699	-2.12195	0.324666	-6.53579	6.33e-11	1.44e-09	DOWN
MYH2	11.8779	-5.18818	0.793828	-6.53565	6.33e-11	1.44e-09	DOWN
PRKAA2	190.547	-2.776	0.424799	-6.53486	6.37e-11	1.45e-09	DOWN
KIF22	4416.49	1.14137	0.174672	6.53435	6.39e-11	1.45e-09	UP
MRPS12	2819.89	1.21724	0.186289	6.53415	6.4e-11	1.45e-09	UP
PYCRL	1235.21	1.18999	0.182119	6.53413	6.4e-11	1.45e-09	UP
C7	1387.36	-4.04761	0.619485	-6.53383	6.41e-11	1.45e-09	DOWN
SH3BP2	3080.35	1.00393	0.153654	6.53372	6.42e-11	1.45e-09	UP
BDKRB1	160.141	-2.55796	0.39157	-6.53259	6.46e-11	1.46e-09	DOWN
RP11-49I11.4	56.9278	1.6514	0.252893	6.53004	6.58e-11	1.49e-09	UP
FOXP4-AS1	17.9026	2.97452	0.45574	6.5268	6.72e-11	1.52e-09	UP
RP1-80N2.3	65.8221	1.99359	0.305495	6.52575	6.77e-11	1.53e-09	UP
RP11-2E11.9	34.9025	1.88369	0.288806	6.52234	6.92e-11	1.56e-09	UP
MTL5	282.457	2.04058	0.313129	6.51673	7.19e-11	1.62e-09	UP
AHNAK	39908.7	-1.61339	0.247604	-6.51599	7.22e-11	1.62e-09	DOWN
NDNF	119.775	-3.04564	0.467405	-6.51607	7.22e-11	1.62e-09	DOWN
XXbac-B476C20.9	52.7133	1.32717	0.203675	6.51609	7.22e-11	1.62e-09	UP
TBL1X	1746.7	-1.3787	0.211606	-6.51539	7.25e-11	1.63e-09	DOWN
CGB5	27.9878	5.7682	0.88537	6.51502	7.27e-11	1.63e-09	UP
EPYC	56.4094	5.19065	0.796905	6.51352	7.34e-11	1.65e-09	UP
TNFAIP8L3	230.495	-2.51006	0.385495	-6.51126	7.45e-11	1.67e-09	DOWN
CRISPLD2	3482.11	-2.18028	0.334908	-6.51008	7.51e-11	1.68e-09	DOWN
RP11-392A14.8	2.70253	-2.76476	0.424768	-6.50888	7.57e-11	1.69e-09	DOWN
NCAM1	762.85	-3.67466	0.56472	-6.50706	7.66e-11	1.71e-09	DOWN
RP11-730A19.9	8.26928	-1.66254	0.255509	-6.50676	7.68e-11	1.71e-09	DOWN
GARNL3	273.62	-1.73317	0.266438	-6.50497	7.77e-11	1.73e-09	DOWN
PRSS3P2	407.194	5.55741	0.854353	6.50482	7.78e-11	1.73e-09	UP
CTSV	857.551	2.94003	0.451982	6.50475	7.78e-11	1.73e-09	UP
MUSTN1	3.73637	-2.08959	0.321255	-6.50445	7.8e-11	1.74e-09	DOWN
CTD-2171N6.1	17.5665	3.93035	0.604527	6.50152	7.95e-11	1.77e-09	UP
LIN9	415.967	1.03136	0.158654	6.50067	8e-11	1.78e-09	UP
CCDC14	2340.76	1.28277	0.197351	6.49994	8.04e-11	1.79e-09	UP
ANGPTL5	3.91112	-3.90686	0.601195	-6.4985	8.11e-11	1.8e-09	DOWN
RP11-298I3.3	15.6285	1.96865	0.302986	6.49749	8.17e-11	1.81e-09	UP
FAM135B	10.692	-4.22958	0.651009	-6.49695	8.2e-11	1.82e-09	DOWN
ESPL1	1374.89	1.5617	0.240554	6.49208	8.47e-11	1.87e-09	UP
FAM195CP	17.3947	3.08492	0.475215	6.49163	8.49e-11	1.88e-09	UP
CTD-2006M22.2	20.5911	-3.33976	0.514559	-6.49053	8.55e-11	1.89e-09	DOWN
RP11-84C10.4	23.5633	2.40334	0.370307	6.49013	8.58e-11	1.89e-09	UP
SEC23A	2793.44	-1.19489	0.184173	-6.48785	8.71e-11	1.92e-09	DOWN
RHPN1	1946.51	2.11093	0.325471	6.48576	8.83e-11	1.95e-09	UP
SETBP1	527.851	-2.1322	0.328887	-6.48309	8.99e-11	1.98e-09	DOWN
NKX3-2	25.4829	3.11895	0.481103	6.48292	9e-11	1.98e-09	UP
HOXB5	424.087	2.62952	0.405642	6.48237	9.03e-11	1.99e-09	UP
HOXB9	482.516	3.23488	0.499051	6.48205	9.05e-11	1.99e-09	UP
KLHL35	141.532	2.14027	0.330305	6.47969	9.19e-11	2.02e-09	UP
OCIAD2	3719.62	1.20126	0.185426	6.47842	9.27e-11	2.03e-09	UP
PDZD4	196.376	-2.75922	0.425913	-6.47837	9.27e-11	2.03e-09	DOWN
ENPP6	29.579	-2.80451	0.432914	-6.47821	9.28e-11	2.04e-09	DOWN
NLGN1	75.1364	-3.06415	0.473058	-6.47732	9.34e-11	2.05e-09	DOWN
CXCL10	3003.76	3.5177	0.543108	6.47698	9.36e-11	2.05e-09	UP
PTGIS	2426.83	-3.43057	0.529768	-6.47562	9.44e-11	2.07e-09	DOWN
KRT31	82.4297	5.29324	0.81758	6.47428	9.53e-11	2.08e-09	UP
KRT18P8	15.989	2.65822	0.410598	6.47403	9.54e-11	2.09e-09	UP
C5orf66-AS1	38.8605	-3.23303	0.499432	-6.47342	9.58e-11	2.09e-09	DOWN
PLIN4	1808.51	-2.63042	0.406413	-6.47229	9.65e-11	2.11e-09	DOWN
FASN	19686	1.42267	0.219881	6.47017	9.79e-11	2.14e-09	UP
MST1P2	129.911	2.01271	0.311099	6.46967	9.82e-11	2.14e-09	UP
ARHGEF26	427.933	-2.00649	0.310213	-6.46811	9.92e-11	2.16e-09	DOWN
DPYSL3	6952.55	-2.42742	0.375321	-6.46759	9.96e-11	2.17e-09	DOWN
LINC01232	362.841	1.62253	0.250885	6.46723	9.98e-11	2.17e-09	UP
AC074117.10	353.43	1.103	0.170557	6.46702	1e-10	2.18e-09	UP
GFRA2	56.4975	-2.4553	0.379732	-6.46588	1.01e-10	2.19e-09	DOWN
RP11-486A14.1	63.9784	2.2166	0.342842	6.46537	1.01e-10	2.2e-09	UP
TCEAL3	1251.03	-1.3175	0.203838	-6.46348	1.02e-10	2.22e-09	DOWN
FHL5	47.5256	-2.39979	0.37128	-6.46356	1.02e-10	2.22e-09	DOWN
MAGEA11	173.993	5.00341	0.774487	6.46029	1.05e-10	2.27e-09	UP
MEST	3353.88	2.45829	0.380876	6.45429	1.09e-10	2.36e-09	UP
CTD-3035D6.2	11.7379	2.92068	0.452528	6.45414	1.09e-10	2.36e-09	UP
HIST1H2AM	18.037	2.76407	0.428349	6.45285	1.1e-10	2.37e-09	UP
RP11-329L6.2	59.9513	1.87828	0.291243	6.4492	1.12e-10	2.43e-09	UP
ANKEF1	658.312	1.26962	0.196906	6.44786	1.13e-10	2.45e-09	UP
LINC01354	18.236	-2.23956	0.347381	-6.44698	1.14e-10	2.46e-09	DOWN
APOA2	100.21	6.13966	0.952939	6.44287	1.17e-10	2.53e-09	UP
IFI6	14078.2	2.56522	0.398161	6.44267	1.17e-10	2.53e-09	UP
RP11-561N12.5	3.20138	-3.2393	0.502786	-6.4427	1.17e-10	2.53e-09	DOWN
DCN	16000.6	-2.64975	0.411297	-6.44244	1.18e-10	2.53e-09	DOWN
XXbac-BPG252P9.10	18.5366	-1.49491	0.232051	-6.44216	1.18e-10	2.53e-09	DOWN
FBXO41	909.143	1.44914	0.224962	6.44171	1.18e-10	2.54e-09	UP
RP11-243M5.2	2.14058	-4.0204	0.624273	-6.44013	1.19e-10	2.56e-09	DOWN
ABCD2	36.5211	-2.62933	0.408291	-6.43984	1.2e-10	2.57e-09	DOWN
ADRB3	37.3556	-3.78005	0.587026	-6.43932	1.2e-10	2.57e-09	DOWN
EGR2	547.651	-2.35859	0.366361	-6.43787	1.21e-10	2.59e-09	DOWN
RAP2C-AS1	45.982	-1.29615	0.201375	-6.4365	1.22e-10	2.61e-09	DOWN
SLC24A3	514.487	-2.37637	0.369221	-6.43618	1.23e-10	2.62e-09	DOWN
KRT16P6	457.619	4.81287	0.747825	6.43583	1.23e-10	2.62e-09	UP
IGSF9	2706.06	2.1337	0.33158	6.43495	1.24e-10	2.63e-09	UP
AC009005.2	93.3199	2.44208	0.379498	6.43502	1.23e-10	2.63e-09	UP
RP11-798M19.6	69.7981	-1.32523	0.206032	-6.43213	1.26e-10	2.68e-09	DOWN
HOXB-AS3	96.6525	3.18541	0.495278	6.43156	1.26e-10	2.69e-09	UP
RP5-890E16.2	34.0068	1.56437	0.243248	6.43116	1.27e-10	2.69e-09	UP
CHKB-AS1	42.8325	1.52445	0.237081	6.43008	1.28e-10	2.71e-09	UP
BLACAT1	96.3242	3.3669	0.523789	6.42798	1.29e-10	2.75e-09	UP
SMC1B	138.828	2.7971	0.435189	6.42732	1.3e-10	2.76e-09	UP
DES	38782.6	-4.4707	0.695595	-6.42716	1.3e-10	2.76e-09	DOWN
LINC00634	15.8815	2.47586	0.385235	6.42687	1.3e-10	2.76e-09	UP
CLN6	2819.61	1.00872	0.156991	6.42535	1.32e-10	2.79e-09	UP
CNPY2	1698.04	1.003	0.156123	6.42445	1.32e-10	2.8e-09	UP
LINC00337	31.1827	2.12267	0.330646	6.41978	1.36e-10	2.89e-09	UP
PRR5-ARHGAP8	11.1054	2.40086	0.374115	6.41744	1.39e-10	2.93e-09	UP
STK31	125.782	2.14951	0.335009	6.41627	1.4e-10	2.94e-09	UP
MYCT1	259.273	-1.67141	0.260528	-6.41547	1.4e-10	2.96e-09	DOWN
IGSF10	149.041	-3.64404	0.568063	-6.41485	1.41e-10	2.97e-09	DOWN
LDB2	462.557	-1.64162	0.255955	-6.41371	1.42e-10	2.99e-09	DOWN
CDH24	803.08	1.43727	0.224103	6.41343	1.42e-10	2.99e-09	UP
PPFIA4	188.829	2.35875	0.367858	6.41213	1.44e-10	3.02e-09	UP
ZFP36L1	19904.3	-1.14979	0.179324	-6.41177	1.44e-10	3.02e-09	DOWN
MRPL40P1	10.5293	3.79314	0.591873	6.40871	1.47e-10	3.08e-09	UP
FIGNL1	759.322	1.16887	0.182479	6.40548	1.5e-10	3.14e-09	UP
PPP1R16A	1612.77	1.20779	0.188606	6.40379	1.52e-10	3.17e-09	UP
CKLF	548.523	1.06937	0.16712	6.39879	1.57e-10	3.28e-09	UP
HSPA12A	219.625	-2.08918	0.326539	-6.39796	1.57e-10	3.29e-09	DOWN
TGFBR2	4160.43	-1.42685	0.223049	-6.39705	1.58e-10	3.31e-09	DOWN
AC068831.6	23.0309	1.6054	0.250975	6.39667	1.59e-10	3.32e-09	UP
COL2A1	37.1415	3.83103	0.598942	6.39633	1.59e-10	3.32e-09	UP
CCDC18	365.468	1.15205	0.180117	6.3961	1.59e-10	3.32e-09	UP
SHE	199.109	-1.81923	0.284482	-6.39489	1.61e-10	3.35e-09	DOWN
CHIC1	454.675	-1.03575	0.161987	-6.39406	1.62e-10	3.37e-09	DOWN
CORO1C	5945.75	-1.34718	0.210711	-6.39348	1.62e-10	3.38e-09	DOWN
FOXD2-AS1	211.236	1.67595	0.262235	6.39103	1.65e-10	3.43e-09	UP
MSH5	136.706	1.49542	0.234107	6.38776	1.68e-10	3.49e-09	UP
S100A8	25767.2	4.13753	0.647766	6.38738	1.69e-10	3.5e-09	UP
PHKG1	77.7116	-1.61203	0.252394	-6.38695	1.69e-10	3.51e-09	DOWN
MED14OS	22.6332	-1.09108	0.17088	-6.38503	1.71e-10	3.55e-09	DOWN
ZIC5	63.9403	4.80757	0.753174	6.38307	1.74e-10	3.59e-09	UP
ETS2	12213.8	-1.48103	0.232078	-6.38161	1.75e-10	3.62e-09	DOWN
LIPG	1409.15	2.58648	0.405482	6.3788	1.78e-10	3.69e-09	UP
HSPA2	1263.13	-2.07053	0.324645	-6.37783	1.8e-10	3.71e-09	DOWN
CDON	258.566	-2.26305	0.354853	-6.37743	1.8e-10	3.72e-09	DOWN
NHSL2	48.8012	-2.50166	0.392295	-6.37699	1.81e-10	3.72e-09	DOWN
MTFP1	341.151	1.27175	0.199473	6.37555	1.82e-10	3.76e-09	UP
RP1-228H13.5	175.104	1.44171	0.226177	6.37425	1.84e-10	3.78e-09	UP
AFAP1-AS1	519.884	4.18749	0.656974	6.3739	1.84e-10	3.79e-09	UP
UBE2S	2516.08	1.37142	0.21517	6.37366	1.85e-10	3.79e-09	UP
CDH3	9030.11	2.73823	0.429631	6.37344	1.85e-10	3.8e-09	UP
CHRM2	196.702	-4.35703	0.683811	-6.37168	1.87e-10	3.84e-09	DOWN
MGLL	2217.67	-1.96355	0.308224	-6.37054	1.88e-10	3.87e-09	DOWN
LINC00162	143.574	4.74373	0.744781	6.3693	1.9e-10	3.9e-09	UP
DNM1P46	4.19174	-2.889	0.453595	-6.3691	1.9e-10	3.9e-09	DOWN
RND3	3993.66	-1.60766	0.252422	-6.36894	1.9e-10	3.9e-09	DOWN
CHURC1	1619.52	-1.00366	0.157602	-6.36834	1.91e-10	3.91e-09	DOWN
HIST1H2APS3	4.31769	4.2664	0.670109	6.36673	1.93e-10	3.95e-09	UP
TARBP1	1930.24	1.05803	0.166215	6.36539	1.95e-10	3.99e-09	UP
CDKN1A	12919.5	-1.58898	0.249653	-6.36474	1.96e-10	4e-09	DOWN
CEP85	1055.74	1.1308	0.177671	6.36456	1.96e-10	4e-09	UP
MKX	79.115	-3.24011	0.509144	-6.36383	1.97e-10	4.02e-09	DOWN
MAP3K8	1081.86	-1.39241	0.21882	-6.36328	1.97e-10	4.03e-09	DOWN
CNKSR3	697.466	-1.68065	0.264126	-6.36306	1.98e-10	4.03e-09	DOWN
TNFSF12	861.832	-1.43589	0.225689	-6.36225	1.99e-10	4.05e-09	DOWN
AF001548.4	2.56249	-3.30216	0.519046	-6.36197	1.99e-10	4.05e-09	DOWN
AACSP1	26.1076	5.30647	0.834121	6.36176	1.99e-10	4.06e-09	UP
SNED1	352.504	-2.0073	0.315586	-6.36053	2.01e-10	4.09e-09	DOWN
PAEP	19.8835	5.32966	0.838763	6.35419	2.1e-10	4.25e-09	UP
NEIL3	182.637	1.99779	0.314466	6.35295	2.11e-10	4.29e-09	UP
SEMA4F	674.144	1.25509	0.197626	6.35082	2.14e-10	4.34e-09	UP
DGKB	40.3118	-3.93762	0.620646	-6.34439	2.23e-10	4.53e-09	DOWN
IGFL1	2456.03	4.45226	0.70191	6.34306	2.25e-10	4.56e-09	UP
LMNB2	6554.74	1.11692	0.176156	6.34052	2.29e-10	4.64e-09	UP
YIF1B	2392.64	1.11347	0.175755	6.33535	2.37e-10	4.78e-09	UP
P3H4	2014.92	1.46799	0.231756	6.33419	2.39e-10	4.81e-09	UP
CKAP2	2023.75	1.19269	0.18831	6.33365	2.39e-10	4.83e-09	UP
IL6	765.274	-3.51059	0.554414	-6.33208	2.42e-10	4.87e-09	DOWN
C6orf3	37.3073	-1.64183	0.259323	-6.33122	2.43e-10	4.89e-09	DOWN
AKT3	1236.68	-1.94642	0.307549	-6.32881	2.47e-10	4.97e-09	DOWN
LL22NC03-N14H11.1	28.815	3.01174	0.476284	6.32341	2.56e-10	5.14e-09	UP
CTC-260E6.4	175.085	2.32825	0.368221	6.32298	2.57e-10	5.15e-09	UP
AC007773.2	53.3735	1.86504	0.295011	6.32195	2.58e-10	5.18e-09	UP
TYMSOS	107.121	1.79932	0.284718	6.31968	2.62e-10	5.25e-09	UP
ROS1	49.6863	4.87061	0.770795	6.31895	2.63e-10	5.27e-09	UP
RP11-342A23.2	1.597	-3.52189	0.557349	-6.31901	2.63e-10	5.27e-09	DOWN
RP11-61L19.2	326.195	3.94306	0.624056	6.31844	2.64e-10	5.29e-09	UP
ZNF530	254.944	1.03358	0.163667	6.31518	2.7e-10	5.4e-09	UP
OPN1SW	129.257	-1.28648	0.203723	-6.31486	2.7e-10	5.4e-09	DOWN
HPSE2	276.192	-3.77237	0.597434	-6.31428	2.71e-10	5.42e-09	DOWN
PRR36	690.607	2.90839	0.460648	6.31368	2.72e-10	5.44e-09	UP
RMI2	1304.04	1.50102	0.237755	6.31332	2.73e-10	5.44e-09	UP
FAM43A	500.538	-1.84138	0.291665	-6.31333	2.73e-10	5.44e-09	DOWN
CAPN10-AS1	100.061	1.25976	0.199539	6.31334	2.73e-10	5.44e-09	UP
CCL14	56.4428	-3.20917	0.508491	-6.31116	2.77e-10	5.51e-09	DOWN
NRIR	20.6688	2.85966	0.453179	6.31023	2.79e-10	5.54e-09	UP
CDKN3	669.125	1.56619	0.248267	6.3085	2.82e-10	5.6e-09	UP
RAET1L	65.1901	3.7305	0.591407	6.30785	2.83e-10	5.62e-09	UP
RP11-667K14.3	44.7824	-1.17854	0.186842	-6.30771	2.83e-10	5.62e-09	DOWN
KCNN2	58.4371	-2.38483	0.3781	-6.30742	2.84e-10	5.63e-09	DOWN
AC079466.1	47.8028	7.37125	1.16886	6.30633	2.86e-10	5.67e-09	UP
SNORD14E	33.8532	2.72646	0.43239	6.30558	2.87e-10	5.69e-09	UP
FAM150B	20.6618	-2.35829	0.374219	-6.3019	2.94e-10	5.82e-09	DOWN
AKAP2	17.6569	-2.72068	0.431728	-6.30185	2.94e-10	5.82e-09	DOWN
PTRF	13823.1	-2.04488	0.324543	-6.30081	2.96e-10	5.85e-09	DOWN
RP11-336A10.4	168.664	4.06244	0.644994	6.29841	3.01e-10	5.94e-09	UP
FGF10	40.1363	-3.95508	0.62796	-6.2983	3.01e-10	5.94e-09	DOWN
RP11-314A20.2	12.4761	2.16433	0.343688	6.29736	3.03e-10	5.98e-09	UP
KLK7	187.186	6.01013	0.954653	6.29562	3.06e-10	6.04e-09	UP
LMCD1	2031.19	-2.11593	0.336126	-6.29504	3.07e-10	6.06e-09	DOWN
SPRR2E	156.314	6.27604	0.997088	6.29437	3.09e-10	6.08e-09	UP
CLIP1	4883.95	-1.06341	0.168977	-6.29325	3.11e-10	6.12e-09	DOWN
LINC00595	4.28703	-3.76807	0.598869	-6.29198	3.13e-10	6.17e-09	DOWN
DMRTA2	149.197	3.71564	0.590608	6.29122	3.15e-10	6.2e-09	UP
ZNF350-AS1	422.67	4.14928	0.659707	6.28957	3.18e-10	6.26e-09	UP
MTTP	20.464	-2.96377	0.471276	-6.28881	3.2e-10	6.29e-09	DOWN
TSHZ3	548.108	-2.13663	0.339822	-6.2875	3.23e-10	6.33e-09	DOWN
MATN2	2483.7	-2.33776	0.371826	-6.28724	3.23e-10	6.34e-09	DOWN
COL7A1	11612.8	2.30683	0.366928	6.28689	3.24e-10	6.35e-09	UP
PRIM1	525.579	1.2233	0.194586	6.28669	3.24e-10	6.36e-09	UP
RP13-216E22.4	12.6728	-1.71506	0.27288	-6.28504	3.28e-10	6.42e-09	DOWN
CTD-3001H11.2	26.7102	1.92857	0.306888	6.28426	3.29e-10	6.45e-09	UP
LINC00896	26.7884	2.55348	0.406458	6.28227	3.34e-10	6.53e-09	UP
RTBDN	25.4252	3.57626	0.569394	6.28081	3.37e-10	6.58e-09	UP
BOP1	4833.23	1.19304	0.190023	6.2784	3.42e-10	6.68e-09	UP
GPM6B	283.678	-1.82389	0.290521	-6.27801	3.43e-10	6.7e-09	DOWN
RP11-667F14.1	17.0922	-1.80157	0.287015	-6.27692	3.45e-10	6.74e-09	DOWN
DRAXIN	64.1533	2.39798	0.382072	6.27626	3.47e-10	6.76e-09	UP
TBX4	165.248	-3.08432	0.491508	-6.27521	3.49e-10	6.81e-09	DOWN
MAGEA12	403.554	6.45073	1.02813	6.27421	3.51e-10	6.85e-09	UP
PRRG3	36.3039	-2.92483	0.466288	-6.27258	3.55e-10	6.91e-09	DOWN
CYCSP6	15.1573	5.1353	0.819276	6.26809	3.65e-10	7.1e-09	UP
TDO2	276.796	2.30485	0.367787	6.26682	3.69e-10	7.15e-09	UP
HIST2H4A	16.6625	2.54463	0.406148	6.26529	3.72e-10	7.22e-09	UP
RP11-4C20.4	19.4224	2.65401	0.423643	6.26474	3.73e-10	7.24e-09	UP
MASP1	112.919	-2.9031	0.463491	-6.26355	3.76e-10	7.29e-09	DOWN
INMT-FAM188B	0.564061	-3.52939	0.563675	-6.26139	3.82e-10	7.38e-09	DOWN
SMC2-AS1	14.1542	-2.03501	0.325156	-6.25856	3.89e-10	7.51e-09	DOWN
GFRA1	196.335	-3.23274	0.516557	-6.25825	3.89e-10	7.52e-09	DOWN
BAGE2	37.1671	8.42923	1.34692	6.25813	3.9e-10	7.52e-09	UP
DUSP2	2259.01	-2.54684	0.40705	-6.25681	3.93e-10	7.57e-09	DOWN
SIX1	533.236	1.90564	0.304563	6.25696	3.93e-10	7.57e-09	UP
HIST1H1B	13.924	3.14621	0.502846	6.25681	3.93e-10	7.57e-09	UP
ARHGAP11A	1261.34	1.33695	0.213702	6.25616	3.95e-10	7.59e-09	UP
VSTM2A	20.3207	-4.79247	0.766158	-6.2552	3.97e-10	7.63e-09	DOWN
LRRC70	17.2524	-1.63678	0.261701	-6.25437	3.99e-10	7.67e-09	DOWN
2023-09-10	2821.55	-1.04013	0.166316	-6.25395	4e-10	7.69e-09	DOWN
HIST1H3C	16.7142	3.07699	0.49204	6.25353	4.01e-10	7.7e-09	UP
RP4-583P15.15	71.4419	1.2203	0.195142	6.25339	4.02e-10	7.71e-09	UP
NFATC4	1368.16	-1.63894	0.262098	-6.25316	4.02e-10	7.71e-09	DOWN
RP11-511H23.2	32.9574	1.64896	0.263748	6.25204	4.05e-10	7.76e-09	UP
BMX	49.8034	-2.15571	0.344875	-6.25071	4.09e-10	7.83e-09	DOWN
C8orf88	79.5575	-2.75766	0.441272	-6.24934	4.12e-10	7.89e-09	DOWN
RP11-783K16.13	105.742	1.19155	0.190784	6.24553	4.22e-10	8.08e-09	UP
KLHL5	1159.56	-1.58794	0.25426	-6.24535	4.23e-10	8.08e-09	DOWN
CLSPN	443.673	1.80474	0.289163	6.24126	4.34e-10	8.29e-09	UP
CTU1	265.029	1.22397	0.19611	6.24125	4.34e-10	8.29e-09	UP
PEAK1	1433.96	-1.06042	0.169936	-6.24013	4.37e-10	8.33e-09	DOWN
SPATA17	156.577	1.98399	0.31813	6.2364	4.48e-10	8.52e-09	UP
CTB-158E9.2	0.700166	-4.38421	0.703121	-6.23536	4.51e-10	8.57e-09	DOWN
PPM1K	653.987	-1.39053	0.22306	-6.23386	4.55e-10	8.65e-09	DOWN
AC006486.10	27.0774	1.30906	0.210038	6.23252	4.59e-10	8.72e-09	UP
ACTL8	31.8912	4.85251	0.778953	6.22952	4.68e-10	8.88e-09	UP
DPYSL2	2319.32	-1.66253	0.267092	-6.22455	4.83e-10	9.16e-09	DOWN
TSHZ1	997.38	-1.13808	0.182937	-6.22113	4.94e-10	9.35e-09	DOWN
RPSAP52	25.4463	3.95722	0.636445	6.21769	5.05e-10	9.55e-09	UP
LINC00959	59.8931	-1.39817	0.224962	-6.21511	5.13e-10	9.7e-09	DOWN
KIFC2	2486.88	1.82645	0.293949	6.21347	5.18e-10	9.8e-09	UP
EMCN	441.558	-1.87996	0.302651	-6.21163	5.24e-10	9.91e-09	DOWN
CEP152	361.957	1.06575	0.171593	6.21093	5.27e-10	9.95e-09	UP
LINC01518	65.2366	4.61188	0.742611	6.21035	5.29e-10	9.98e-09	UP
SNX10	752.838	1.71085	0.275571	6.20839	5.35e-10	1.01e-08	UP
KLF2P1	24.6629	5.43072	0.875738	6.20131	5.6e-10	1.05e-08	UP
AMH	178.329	2.87698	0.463946	6.2011	5.61e-10	1.06e-08	UP
RP1-92O14.3	52.1082	1.66165	0.268016	6.19982	5.65e-10	1.06e-08	UP
RXRG	13.7262	-3.53409	0.570042	-6.1997	5.66e-10	1.06e-08	DOWN
RAD18	907.356	1.01727	0.164124	6.19818	5.71e-10	1.07e-08	UP
BCHE	176.202	-3.34193	0.539402	-6.19562	5.81e-10	1.09e-08	DOWN
PRX	274.383	-1.33698	0.21582	-6.19488	5.83e-10	1.09e-08	DOWN
DUSP5P1	23.9181	3.48795	0.563108	6.1941	5.86e-10	1.1e-08	UP
CTD-2521M24.6	16.6177	1.39626	0.225483	6.19229	5.93e-10	1.11e-08	UP
RP11-561N12.6	3.04608	-3.36262	0.5432	-6.19038	6e-10	1.12e-08	DOWN
ACTA1	47.2139	-2.34054	0.378108	-6.19015	6.01e-10	1.13e-08	DOWN
FGA	36.0748	7.63428	1.23333	6.18999	6.02e-10	1.13e-08	UP
SDAD1P1	77.3253	-1.20527	0.194718	-6.18982	6.02e-10	1.13e-08	DOWN
GNAZ	193.845	-2.52894	0.408573	-6.18969	6.03e-10	1.13e-08	DOWN
BCL2	480.842	-1.62519	0.262581	-6.1893	6.04e-10	1.13e-08	DOWN
ALPPL2	31.4706	5.03154	0.813203	6.18731	6.12e-10	1.14e-08	UP
C19orf73	65.4822	1.39835	0.226034	6.18646	6.15e-10	1.15e-08	UP
CCDC80	5106.15	-2.71862	0.439591	-6.18442	6.23e-10	1.16e-08	DOWN
CLSTN3	4280.26	1.16477	0.188339	6.18442	6.23e-10	1.16e-08	UP
RUSC1-AS1	307.911	1.3792	0.223069	6.18285	6.3e-10	1.17e-08	UP
PDLIM5	4357.58	-1.13141	0.183068	-6.18029	6.4e-10	1.19e-08	DOWN
SQLE	4125.67	1.44504	0.233917	6.17756	6.51e-10	1.21e-08	UP
SLURP1	32.9048	3.8901	0.629836	6.17637	6.56e-10	1.22e-08	UP
RP11-395L14.18	35.9666	-1.28648	0.208342	-6.17484	6.62e-10	1.23e-08	DOWN
RUNDC3A-AS1	49.5534	2.17095	0.351668	6.17331	6.69e-10	1.24e-08	UP
RP11-475B2.1	1.97556	-3.81833	0.61852	-6.17334	6.69e-10	1.24e-08	DOWN
PODXL2	2474.05	2.095	0.339373	6.17315	6.69e-10	1.24e-08	UP
CKB	5305.88	-2.39904	0.388642	-6.17288	6.71e-10	1.24e-08	DOWN
UCN2	165.408	2.49834	0.40478	6.1721	6.74e-10	1.25e-08	UP
CYYR1	435.684	-1.46196	0.236912	-6.17093	6.79e-10	1.26e-08	DOWN
NCAPD2	6125.64	1.12518	0.182338	6.17084	6.79e-10	1.26e-08	UP
GINS4	383.434	1.47387	0.23885	6.17069	6.8e-10	1.26e-08	UP
RP11-353N14.2	40.4673	2.50512	0.406015	6.17001	6.83e-10	1.26e-08	UP
RP11-461O7.1	4.13816	-3.34594	0.542493	-6.1677	6.93e-10	1.28e-08	DOWN
TYMS	2188.25	1.50587	0.244189	6.16682	6.97e-10	1.28e-08	UP
RP11-175K6.2	32.6534	-1.98641	0.322146	-6.16618	7e-10	1.29e-08	DOWN
GHR	144.322	-2.50455	0.406208	-6.16569	7.02e-10	1.29e-08	DOWN
PCK2	3016.73	1.12488	0.182529	6.16274	7.15e-10	1.32e-08	UP
PREX2	243.001	-1.96732	0.319256	-6.16222	7.17e-10	1.32e-08	DOWN
OSBPL5	1169.28	-1.06657	0.173099	-6.16165	7.2e-10	1.32e-08	DOWN
RBM24	98.256	-3.08633	0.500921	-6.16131	7.21e-10	1.33e-08	DOWN
IRF5	1933.01	1.52246	0.247149	6.16008	7.27e-10	1.33e-08	UP
RGS19	1067.54	1.0375	0.168481	6.15797	7.37e-10	1.35e-08	UP
RGN	74.8181	-2.60441	0.422949	-6.15773	7.38e-10	1.35e-08	DOWN
PCGF2	3070.97	1.11462	0.181021	6.15741	7.39e-10	1.36e-08	UP
ZNF736P9Y	47.5909	5.34194	0.867607	6.1571	7.41e-10	1.36e-08	UP
PDE4B	538.933	-2.09763	0.340737	-6.15616	7.45e-10	1.36e-08	DOWN
TMEM35	164.672	-3.3396	0.542514	-6.15579	7.47e-10	1.37e-08	DOWN
TUBB3	313.855	2.38046	0.386784	6.15449	7.53e-10	1.38e-08	UP
ADAMTS9	648.998	-1.94478	0.316026	-6.15387	7.56e-10	1.38e-08	DOWN
RGAG4	252.323	-2.17203	0.352998	-6.15309	7.6e-10	1.39e-08	DOWN
CTD-2537I9.12	97.7004	1.58568	0.257726	6.15258	7.62e-10	1.39e-08	UP
PODN	1630.03	-2.4371	0.396178	-6.15153	7.67e-10	1.4e-08	DOWN
MIIP	2001.64	1.03678	0.168547	6.15126	7.69e-10	1.4e-08	UP
ZRANB1	655.481	-1.0009	0.162804	-6.14788	7.85e-10	1.43e-08	DOWN
TUB	270.752	-2.16256	0.351863	-6.14603	7.94e-10	1.44e-08	DOWN
PYY2	50.2341	2.80297	0.456231	6.14374	8.06e-10	1.46e-08	UP
GALNT6	1419.17	1.96124	0.319268	6.14293	8.1e-10	1.47e-08	UP
RP4-758J18.13	135.145	1.1398	0.185561	6.14245	8.13e-10	1.47e-08	UP
XPNPEP2	99.9673	-3.71352	0.604598	-6.14214	8.14e-10	1.48e-08	DOWN
CACNB3	2330.27	1.22065	0.198781	6.14067	8.22e-10	1.49e-08	UP
TMEM191C	46.9761	2.48148	0.404104	6.1407	8.22e-10	1.49e-08	UP
FAXC	236.392	-2.16162	0.352099	-6.13925	8.29e-10	1.5e-08	DOWN
CTB-60B18.10	9.51834	2.88418	0.469792	6.13926	8.29e-10	1.5e-08	UP
IGFL1P1	62.8709	3.87848	0.631819	6.13859	8.33e-10	1.51e-08	UP
RP11-172H24.4	166.074	2.24244	0.365425	6.13653	8.43e-10	1.52e-08	UP
GAS7	1032.11	-2.23284	0.363959	-6.13487	8.52e-10	1.54e-08	DOWN
PANO1	38.4471	1.49445	0.24361	6.13461	8.54e-10	1.54e-08	UP
AC145124.2	8.44477	-1.90174	0.310226	-6.13016	8.78e-10	1.58e-08	DOWN
MAST1	150.06	2.21177	0.361058	6.12581	9.02e-10	1.63e-08	UP
RP11-66B24.4	144.581	-1.56683	0.255898	-6.12288	9.19e-10	1.65e-08	DOWN
PER3	851.853	-1.59183	0.260041	-6.12146	9.27e-10	1.67e-08	DOWN
OTOF	126.924	2.83656	0.46346	6.1204	9.33e-10	1.68e-08	UP
PHYHIP	256.167	-2.70144	0.441391	-6.12029	9.34e-10	1.68e-08	DOWN
CNGB3	47.6389	2.06209	0.33696	6.11968	9.38e-10	1.68e-08	UP
ADM2	280.114	2.24021	0.366131	6.1186	9.44e-10	1.69e-08	UP
MS4A15	32.4098	4.67362	0.763891	6.11818	9.46e-10	1.7e-08	UP
ZNF497	97.0418	1.19337	0.195076	6.11743	9.51e-10	1.7e-08	UP
WDR34	4911.51	1.33807	0.218799	6.11554	9.62e-10	1.72e-08	UP
ATL1	289.249	-1.42128	0.232412	-6.11534	9.63e-10	1.73e-08	DOWN
GCSAML	12.3677	-2.54488	0.41621	-6.1144	9.69e-10	1.73e-08	DOWN
ITGB3	117.827	-2.42547	0.396721	-6.11379	9.73e-10	1.74e-08	DOWN
RP11-572O17.1	60.3924	1.75017	0.286302	6.11302	9.78e-10	1.75e-08	UP
ZNF726	306.942	1.8965	0.310252	6.11279	9.79e-10	1.75e-08	UP
TSTA3	5736.25	1.02959	0.168555	6.10833	1.01e-09	1.8e-08	UP
NEURL1B	1547.06	-1.60859	0.263358	-6.10798	1.01e-09	1.8e-08	DOWN
CRHBP	9.99768	-2.50187	0.409635	-6.10754	1.01e-09	1.8e-08	DOWN
CCDC34	833.552	1.13945	0.186612	6.10598	1.02e-09	1.82e-08	UP
FAHD2P1	60.8777	4.16516	0.682288	6.10469	1.03e-09	1.83e-08	UP
RP11-359P5.1	4.75178	-1.60708	0.263389	-6.10152	1.05e-09	1.87e-08	DOWN
GDF10	14.5005	-3.49653	0.573193	-6.10009	1.06e-09	1.89e-08	DOWN
CTD-2006C1.6	16.8383	1.77554	0.291144	6.0985	1.07e-09	1.9e-08	UP
CEBPB-AS1	48.331	-1.4121	0.231704	-6.09441	1.1e-09	1.95e-08	DOWN
ACOT4	270.99	1.59522	0.261764	6.09409	1.1e-09	1.95e-08	UP
RP11-666A8.8	17.4408	1.59505	0.261804	6.09253	1.11e-09	1.97e-08	UP
CACNA2D1	518.617	-2.45846	0.403554	-6.09203	1.11e-09	1.98e-08	DOWN
RP11-554A11.5	2.01085	-2.70091	0.443439	-6.09082	1.12e-09	1.99e-08	DOWN
PDZK1	46.5147	2.81181	0.461675	6.09046	1.13e-09	2e-08	UP
PRKCB	485.352	-2.36371	0.388156	-6.08958	1.13e-09	2e-08	DOWN
MCL1	22019.2	-1.05375	0.17305	-6.08927	1.13e-09	2.01e-08	DOWN
HPGDS	57.5473	-2.09664	0.344369	-6.08834	1.14e-09	2.02e-08	DOWN
LAMA4	3379.27	-1.70144	0.279475	-6.08798	1.14e-09	2.02e-08	DOWN
RP11-417L19.6	30.8139	1.49169	0.245024	6.08794	1.14e-09	2.02e-08	UP
PRR9	170.327	5.18409	0.851619	6.08733	1.15e-09	2.03e-08	UP
ZNF154	135.635	-1.77086	0.290956	-6.08635	1.16e-09	2.04e-08	DOWN
RP4-633O19__A.1	5.10113	-1.53522	0.252263	-6.08579	1.16e-09	2.04e-08	DOWN
ZNF488	560.252	2.68978	0.441993	6.08556	1.16e-09	2.05e-08	UP
PPP1R35	1136.13	1.08696	0.178624	6.08521	1.16e-09	2.05e-08	UP
SNORA60	8.51874	2.15757	0.354737	6.08217	1.19e-09	2.09e-08	UP
PRIMA1	98.2748	-3.22681	0.530634	-6.08106	1.19e-09	2.1e-08	DOWN
MAGOH2P	4.912	-1.68002	0.27628	-6.08084	1.2e-09	2.1e-08	DOWN
BNC2	394.349	-2.52651	0.415508	-6.08054	1.2e-09	2.11e-08	DOWN
MRAS	945.576	-1.62688	0.267565	-6.08032	1.2e-09	2.11e-08	DOWN
LIFR	822.938	-2.17635	0.357994	-6.07929	1.21e-09	2.12e-08	DOWN
KCNG1	2120.52	2.91943	0.480263	6.07882	1.21e-09	2.13e-08	UP
RP3-425C14.4	307.995	-1.15785	0.190495	-6.07813	1.22e-09	2.13e-08	DOWN
MYRFL	36.6205	3.1334	0.51569	6.07612	1.23e-09	2.16e-08	UP
BOC	645.6	-2.52982	0.416393	-6.07556	1.24e-09	2.17e-08	DOWN
RNU6-529P	5.39651	-1.49026	0.245297	-6.07535	1.24e-09	2.17e-08	DOWN
PDGFD	472.284	-1.96121	0.322869	-6.07431	1.25e-09	2.18e-08	DOWN
MICB	439.516	1.8739	0.308589	6.07248	1.26e-09	2.2e-08	UP
ESCO2	334.058	1.47797	0.24346	6.0707	1.27e-09	2.23e-08	UP
RP11-148L24.1	3.94785	-3.25632	0.536604	-6.0684	1.29e-09	2.26e-08	DOWN
LINC01424	11.8066	2.00724	0.330872	6.06651	1.31e-09	2.28e-08	UP
RP11-131H24.4	2.93002	-3.45748	0.569935	-6.06645	1.31e-09	2.28e-08	DOWN
AFAP1	1655.88	-1.36683	0.225318	-6.0662	1.31e-09	2.28e-08	DOWN
RP11-297P16.4	85.8304	7.64391	1.26018	6.06571	1.31e-09	2.29e-08	UP
IGFL4	13.9306	3.76367	0.6207	6.06359	1.33e-09	2.32e-08	UP
NOVA1	102.404	-2.7509	0.453726	-6.06291	1.34e-09	2.33e-08	DOWN
RP11-485G7.6	10.1517	2.3137	0.381611	6.06298	1.34e-09	2.33e-08	UP
CTD-2313J17.5	45.3561	1.54843	0.25542	6.06229	1.34e-09	2.34e-08	UP
SOWAHC	2858.3	-1.50583	0.24843	-6.06138	1.35e-09	2.35e-08	DOWN
KPTN	754.517	1.00362	0.165585	6.06107	1.35e-09	2.35e-08	UP
ADRA1D	24.6208	-2.77894	0.458539	-6.06041	1.36e-09	2.36e-08	DOWN
CCDC78	118.537	1.89692	0.313045	6.05958	1.36e-09	2.37e-08	UP
GATA5	96.2859	-3.84831	0.635754	-6.05314	1.42e-09	2.46e-08	DOWN
RP11-890B15.3	218.409	-1.1675	0.192887	-6.05279	1.42e-09	2.46e-08	DOWN
HEPHL1	212.761	3.68925	0.609535	6.05256	1.43e-09	2.47e-08	UP
RRM2	4442.17	1.61945	0.267679	6.04995	1.45e-09	2.51e-08	UP
GGCT	3566.5	1.03913	0.171779	6.04923	1.46e-09	2.52e-08	UP
PBK	696.815	1.5923	0.263264	6.04829	1.46e-09	2.53e-08	UP
AC004754.3	7.08614	-1.52167	0.251592	-6.04816	1.47e-09	2.53e-08	DOWN
SNRPF	3532.76	1.00847	0.166766	6.04722	1.47e-09	2.54e-08	UP
RAD9A	1474.05	1.13698	0.188029	6.0468	1.48e-09	2.55e-08	UP
LINC01234	175.759	4.09888	0.677923	6.04622	1.48e-09	2.56e-08	UP
RP1-292L20.3	16.2578	-1.27555	0.211052	-6.04379	1.51e-09	2.59e-08	DOWN
NFIB	1946.19	-1.56525	0.259003	-6.04337	1.51e-09	2.6e-08	DOWN
VGF	89.5288	2.39985	0.397135	6.04292	1.51e-09	2.61e-08	UP
LPAR1	814.01	-1.63002	0.269772	-6.0422	1.52e-09	2.62e-08	DOWN
TSLP	103.156	-2.17778	0.36047	-6.0415	1.53e-09	2.63e-08	DOWN
ZNF738	578.376	1.48575	0.245968	6.0404	1.54e-09	2.64e-08	UP
PLAU	9812.19	2.10501	0.348553	6.03929	1.55e-09	2.66e-08	UP
DLC1	1128.84	-1.63485	0.270762	-6.03797	1.56e-09	2.68e-08	DOWN
IER2	7307.73	-1.13063	0.187335	-6.03538	1.59e-09	2.72e-08	DOWN
CNTD2	55.2435	2.67045	0.442511	6.03476	1.59e-09	2.73e-08	UP
AL589743.1	56.1713	2.87114	0.475875	6.03341	1.61e-09	2.75e-08	UP
RP11-120J1.1	5.96427	-3.40389	0.564207	-6.03305	1.61e-09	2.76e-08	DOWN
CPQ	1268.35	-1.60135	0.265504	-6.03136	1.63e-09	2.79e-08	DOWN
KLRB1	97.9145	-2.09457	0.347311	-6.03083	1.63e-09	2.79e-08	DOWN
ERVMER34-1	416.842	2.21946	0.368049	6.03035	1.64e-09	2.8e-08	UP
HIST2H2BE	1801.33	1.81353	0.300906	6.02689	1.67e-09	2.86e-08	UP
BAI3	48.6083	-3.28444	0.545132	-6.02505	1.69e-09	2.89e-08	DOWN
DDN	42.2914	2.63022	0.43664	6.02377	1.7e-09	2.91e-08	UP
SSC4D	92.4355	1.87608	0.311472	6.02326	1.71e-09	2.92e-08	UP
TMEM88	168.932	-1.54477	0.256574	-6.02077	1.74e-09	2.96e-08	DOWN
RP11-346D19.1	11.1716	3.5265	0.586142	6.01646	1.78e-09	3.04e-08	UP
LHFP	1193.34	-1.64483	0.273509	-6.01381	1.81e-09	3.09e-08	DOWN
ZDHHC12	3049.54	1.07857	0.179362	6.01336	1.82e-09	3.09e-08	UP
RP11-279N8.1	4.88494	4.27924	0.711648	6.01315	1.82e-09	3.1e-08	UP
UTRN	1907.43	-1.45281	0.241666	-6.01163	1.84e-09	3.12e-08	DOWN
EEF1A1P9	132.743	-1.13603	0.188981	-6.01138	1.84e-09	3.12e-08	DOWN
KIAA1377	214.463	-1.65874	0.276001	-6.00989	1.86e-09	3.15e-08	DOWN
GNAQ	3569.61	-1.03962	0.172994	-6.00959	1.86e-09	3.16e-08	DOWN
PCSK1N	195.614	3.36538	0.560039	6.0092	1.86e-09	3.16e-08	UP
SLC16A13	397.003	1.26	0.209687	6.00893	1.87e-09	3.17e-08	UP
AC004637.1	2.92917	-3.40409	0.56654	-6.00856	1.87e-09	3.17e-08	DOWN
PNPLA3	27.6152	2.99666	0.498752	6.00832	1.87e-09	3.17e-08	UP
CNTN4	98.837	-2.20104	0.366367	-6.00775	1.88e-09	3.18e-08	DOWN
LEMD1	52.4263	3.74222	0.622914	6.00761	1.88e-09	3.19e-08	UP
TACC1	5917.75	-1.66249	0.276768	-6.00682	1.89e-09	3.2e-08	DOWN
RP11-37C7.3	31.2935	1.75179	0.291736	6.00471	1.92e-09	3.24e-08	UP
AC007193.6	26.2461	3.98247	0.663295	6.00407	1.92e-09	3.25e-08	UP
CTD-2574D22.4	151.23	1.19401	0.198904	6.00295	1.94e-09	3.27e-08	UP
ADAMTS5	285.323	-1.87273	0.312015	-6.00207	1.95e-09	3.29e-08	DOWN
FKBPL	548.178	1.03876	0.173071	6.00192	1.95e-09	3.29e-08	UP
DLEU7-AS1	18.378	2.36163	0.393544	6.00092	1.96e-09	3.31e-08	UP
RP11-661A12.9	27.3386	2.1982	0.366386	5.99968	1.98e-09	3.33e-08	UP
ANKRD19P	344.874	2.51571	0.41945	5.99763	2e-09	3.37e-08	UP
LA16c-60H5.7	19.6749	2.56033	0.426891	5.99762	2e-09	3.37e-08	UP
MIR4477B	38.8193	1.82637	0.304566	5.99663	2.01e-09	3.39e-08	UP
RP11-649A18.12	77.1306	1.13503	0.18929	5.99622	2.02e-09	3.4e-08	UP
MS4A2	69.9002	-2.40712	0.401505	-5.99526	2.03e-09	3.41e-08	DOWN
AC006277.3	37.1727	1.56066	0.260348	5.9945	2.04e-09	3.43e-08	UP
SDC3	4090.02	-1.31787	0.219909	-5.9928	2.06e-09	3.46e-08	DOWN
RP11-57H14.4	157.445	-1.22654	0.204698	-5.99194	2.07e-09	3.48e-08	DOWN
CPNE6	19.5829	-3.75746	0.627233	-5.99053	2.09e-09	3.51e-08	DOWN
FAM19A3	15.0244	3.09434	0.51669	5.98877	2.11e-09	3.54e-08	UP
PSG4	132.065	4.93544	0.824514	5.98588	2.15e-09	3.6e-08	UP
ACKR1	1068.82	-3.11744	0.520819	-5.98566	2.16e-09	3.6e-08	DOWN
SHCBP1	836.087	1.44037	0.240638	5.98564	2.16e-09	3.6e-08	UP
LIPI	5.06265	-2.48568	0.415271	-5.98567	2.15e-09	3.6e-08	DOWN
GYPC	767.832	-2.13927	0.357458	-5.98468	2.17e-09	3.62e-08	DOWN
RP11-455F5.6	29.3837	2.15328	0.359817	5.98439	2.17e-09	3.63e-08	UP
NFE2L3	1929.44	1.60821	0.268753	5.98398	2.18e-09	3.64e-08	UP
TRIB3	1699.86	1.67506	0.280003	5.98229	2.2e-09	3.67e-08	UP
MAGEA4	1248.56	5.96654	0.997363	5.98232	2.2e-09	3.67e-08	UP
HIST1H2AH	4.7123	3.73563	0.624447	5.9823	2.2e-09	3.67e-08	UP
RP11-753A21.1	0.680075	-4.4828	0.749372	-5.98208	2.2e-09	3.67e-08	DOWN
CXCR2	132.002	-2.54402	0.42532	-5.98142	2.21e-09	3.68e-08	DOWN
RP11-314N13.10	18.1708	-2.0272	0.338935	-5.98108	2.22e-09	3.69e-08	DOWN
HIF3A	255.099	-3.20032	0.535092	-5.98088	2.22e-09	3.69e-08	DOWN
CNRIP1	340.296	-1.88041	0.314518	-5.97872	2.25e-09	3.74e-08	DOWN
MCIDAS	77.2433	2.05141	0.343165	5.9779	2.26e-09	3.75e-08	UP
IGFL3	13.3568	6.03491	1.00958	5.97762	2.26e-09	3.76e-08	UP
KRTAP4-1	38.9233	2.4648	0.412373	5.97711	2.27e-09	3.77e-08	UP
GBX1	13.012	5.38788	0.901445	5.97693	2.27e-09	3.77e-08	UP
MYLK-AS1	46.3142	1.43218	0.239664	5.97578	2.29e-09	3.79e-08	UP
SLC39A11	2790.97	1.00545	0.168278	5.97491	2.3e-09	3.81e-08	UP
MRGPRF-AS1	5.91143	-2.77739	0.464842	-5.97491	2.3e-09	3.81e-08	DOWN
RP11-10O17.1	27.3969	1.59216	0.26659	5.97229	2.34e-09	3.87e-08	UP
KCNK9	34.3453	3.34325	0.55988	5.97136	2.35e-09	3.89e-08	UP
C2CD4B	120.145	-2.54114	0.425584	-5.97096	2.36e-09	3.9e-08	DOWN
DKFZp434J0226	130.542	3.45971	0.579502	5.97014	2.37e-09	3.92e-08	UP
LINC00881	4.05758	-2.90848	0.487228	-5.96945	2.38e-09	3.93e-08	DOWN
RP4-730K3.3	20.1711	1.32239	0.221624	5.96684	2.42e-09	3.99e-08	UP
EIF4EBP1	3618.08	1.52333	0.255321	5.96632	2.43e-09	4e-08	UP
CBX2	1232.41	2.08129	0.348835	5.9664	2.43e-09	4e-08	UP
ACTN1	15456.1	-1.54007	0.258135	-5.96613	2.43e-09	4.01e-08	DOWN
CTD-2589M5.4	3.98189	-3.43012	0.575045	-5.96497	2.45e-09	4.03e-08	DOWN
RP1-34H18.1	2.22086	-2.74117	0.459669	-5.96336	2.47e-09	4.06e-08	DOWN
PDZD7	80.9387	1.98286	0.332523	5.96309	2.48e-09	4.07e-08	UP
HIST1H2BM	4.37605	4.1197	0.690883	5.96294	2.48e-09	4.07e-08	UP
RAB3IP	1857.68	1.63863	0.274882	5.96122	2.5e-09	4.11e-08	UP
PABPC5	25.2333	-2.31466	0.388312	-5.96083	2.51e-09	4.12e-08	DOWN
MXD3	625.368	1.28779	0.216047	5.9607	2.51e-09	4.12e-08	UP
IL11RA	427.195	-1.28985	0.216414	-5.96011	2.52e-09	4.13e-08	DOWN
RP11-863P13.5	1.02232	-3.23061	0.542035	-5.96015	2.52e-09	4.13e-08	DOWN
TSHB	0.954453	-3.30669	0.554845	-5.95967	2.53e-09	4.14e-08	DOWN
FBXL8	335.899	1.11058	0.186357	5.9594	2.53e-09	4.14e-08	UP
FBLN2	3533.14	-2.35187	0.394731	-5.95815	2.55e-09	4.17e-08	DOWN
NMB	803.938	1.4876	0.249776	5.95575	2.59e-09	4.23e-08	UP
RP13-942N8.1	73.4953	1.5315	0.257147	5.95574	2.59e-09	4.23e-08	UP
AC092155.1	8.14434	-1.4955	0.251129	-5.95512	2.6e-09	4.24e-08	DOWN
RP11-277B15.3	25.1002	1.88616	0.316734	5.95501	2.6e-09	4.24e-08	UP
ITPR3	4627.91	1.39734	0.234669	5.95451	2.61e-09	4.25e-08	UP
RP5-1157M23.2	17.9236	1.47166	0.247165	5.95417	2.61e-09	4.26e-08	UP
SYT11	690.056	-1.85771	0.312028	-5.95365	2.62e-09	4.27e-08	DOWN
MBOAT7	11229.9	1.12811	0.189612	5.94958	2.69e-09	4.38e-08	UP
SBK1	1124.41	2.66319	0.447705	5.94853	2.71e-09	4.4e-08	UP
GOLGA8VP	3.15371	-2.53218	0.425704	-5.94822	2.71e-09	4.41e-08	DOWN
KLHL30	47.4075	-2.13708	0.359555	-5.94367	2.79e-09	4.52e-08	DOWN
UCK2	2503.15	1.07614	0.181106	5.94203	2.82e-09	4.57e-08	UP
FBN2	1469.14	3.03922	0.511513	5.94162	2.82e-09	4.58e-08	UP
SEPT7-AS1	36.8649	-1.14113	0.192071	-5.9412	2.83e-09	4.59e-08	DOWN
TCF19	2233.01	1.45098	0.244246	5.94065	2.84e-09	4.6e-08	UP
DCHS2	34.824	-3.15635	0.531352	-5.94022	2.85e-09	4.61e-08	DOWN
2023-03-10	31.2386	2.29518	0.386531	5.93788	2.89e-09	4.67e-08	UP
LIX1L	1217.81	-1.3242	0.223045	-5.93691	2.9e-09	4.7e-08	DOWN
LINC00694	5.85797	-2.71101	0.45664	-5.93687	2.91e-09	4.7e-08	DOWN
GLIPR1L2	23.7724	-1.5833	0.266726	-5.93605	2.92e-09	4.72e-08	DOWN
[truncated: 6,868 more rows]
