# Supplementary material for: Identification of tryptophan metabolism- and immune-related genes signature and prediction of immune infiltration landscape in bladder urothelial carcinoma
Source: Front Immunol. 2023 Oct 26;14:1283792. doi: 10.3389/fimmu.2023.1283792 (PMC10637370; doi:10.3389/fimmu.2023.1283792)
Supplement: Supplementary file 5 [file Table_4.xlsx]

## Sheet: Sheet1
ONTOLOGY	ID	Description	BgRatio	pvalue	p.adjust	qvalue	geneID	Count
BP	GO:0006568	tryptophan metabolic process	11/18903	9.3e-13	1.09e-10	3.33e-11	TDO2/IDO1/KMO/KYNU	4
BP	GO:0070189	kynurenine metabolic process	11/18903	9.3e-13	1.09e-10	3.33e-11	TDO2/IDO1/KMO/KYNU	4
BP	GO:0006586	indolalkylamine metabolic process	13/18903	2.02e-12	1.58e-10	4.81e-11	TDO2/IDO1/KMO/KYNU	4
BP	GO:0009074	aromatic amino acid family catabolic process	16/18903	5.13e-12	3.01e-10	9.18e-11	TDO2/IDO1/KMO/KYNU	4
BP	GO:1901606	alpha-amino acid catabolic process	95/18903	1.72e-11	8.1e-10	2.47e-10	TDO2/ACAT1/IDO1/KMO/KYNU	5
BP	GO:0042430	indole-containing compound metabolic process	24/18903	2.99e-11	1.17e-09	3.57e-10	TDO2/IDO1/KMO/KYNU	4
BP	GO:0009063	cellular amino acid catabolic process	113/18903	4.17e-11	1.23e-09	3.75e-10	TDO2/ACAT1/IDO1/KMO/KYNU	5
BP	GO:0009435	NAD biosynthetic process	26/18903	4.21e-11	1.23e-09	3.75e-10	NAMPT/IDO1/KMO/KYNU	4
BP	GO:0042537	benzene-containing compound metabolic process	27/18903	4.94e-11	1.23e-09	3.75e-10	TDO2/IDO1/KMO/KYNU	4
BP	GO:0019359	nicotinamide nucleotide biosynthetic process	28/18903	5.76e-11	1.23e-09	3.75e-10	NAMPT/IDO1/KMO/KYNU	4
BP	GO:0019363	pyridine nucleotide biosynthetic process	28/18903	5.76e-11	1.23e-09	3.75e-10	NAMPT/IDO1/KMO/KYNU	4
BP	GO:0009072	aromatic amino acid family metabolic process	30/18903	7.71e-11	1.51e-09	4.6e-10	TDO2/IDO1/KMO/KYNU	4
BP	GO:0072525	pyridine-containing compound biosynthetic process	31/18903	8.85e-11	1.6e-09	4.88e-10	NAMPT/IDO1/KMO/KYNU	4
BP	GO:1901605	alpha-amino acid metabolic process	205/18903	8.5e-10	1.43e-08	4.34e-09	TDO2/ACAT1/IDO1/KMO/KYNU	5
BP	GO:0046395	carboxylic acid catabolic process	243/18903	2e-09	3.13e-08	9.55e-09	TDO2/ACAT1/IDO1/KMO/KYNU	5
BP	GO:0016054	organic acid catabolic process	247/18903	2.17e-09	3.19e-08	9.72e-09	TDO2/ACAT1/IDO1/KMO/KYNU	5
BP	GO:0019362	pyridine nucleotide metabolic process	73/18903	3.05e-09	3.98e-08	1.21e-08	NAMPT/IDO1/KMO/KYNU	4
BP	GO:0046496	nicotinamide nucleotide metabolic process	73/18903	3.05e-09	3.98e-08	1.21e-08	NAMPT/IDO1/KMO/KYNU	4
BP	GO:0072524	pyridine-containing compound metabolic process	79/18903	4.21e-09	5.21e-08	1.59e-08	NAMPT/IDO1/KMO/KYNU	4
BP	GO:0006520	cellular amino acid metabolic process	289/18903	4.78e-09	5.62e-08	1.71e-08	TDO2/ACAT1/IDO1/KMO/KYNU	5
BP	GO:0009165	nucleotide biosynthetic process	304/18903	6.17e-09	6.81e-08	2.07e-08	NAMPT/ACAT1/IDO1/KMO/KYNU	5
BP	GO:1901293	nucleoside phosphate biosynthetic process	306/18903	6.37e-09	6.81e-08	2.07e-08	NAMPT/ACAT1/IDO1/KMO/KYNU	5
BP	GO:0006576	cellular biogenic amine metabolic process	97/18903	9.7e-09	9.91e-08	3.02e-08	TDO2/IDO1/KMO/KYNU	4
BP	GO:0044106	cellular amine metabolic process	108/18903	1.5e-08	1.47e-07	4.47e-08	TDO2/IDO1/KMO/KYNU	4
BP	GO:0044282	small molecule catabolic process	385/18903	2.02e-08	1.87e-07	5.7e-08	TDO2/ACAT1/IDO1/KMO/KYNU	5
BP	GO:0009308	amine metabolic process	117/18903	2.07e-08	1.87e-07	5.7e-08	TDO2/IDO1/KMO/KYNU	4
BP	GO:0046700	heterocycle catabolic process	468/18903	5.35e-08	4.66e-07	1.42e-07	TDO2/ACAT1/IDO1/KMO/KYNU	5
BP	GO:0044270	cellular nitrogen compound catabolic process	474/18903	5.71e-08	4.79e-07	1.46e-07	TDO2/ACAT1/IDO1/KMO/KYNU	5
BP	GO:0019439	aromatic compound catabolic process	489/18903	6.67e-08	5.4e-07	1.65e-07	TDO2/ACAT1/IDO1/KMO/KYNU	5
BP	GO:0042180	cellular ketone metabolic process	218/18903	2.54e-07	1.99e-06	6.05e-07	TDO2/IDO1/KMO/KYNU	4
BP	GO:0043650	dicarboxylic acid biosynthetic process	14/18903	7.63e-06	5.78e-05	1.76e-05	KMO/KYNU	2
BP	GO:0006084	acetyl-CoA metabolic process	33/18903	4.41e-05	0.000324141	9.87e-05	TDO2/ACAT1	2
BP	GO:0046394	carboxylic acid biosynthetic process	326/18903	9.78e-05	0.000688393	0.000209679	IDO1/KMO/KYNU	3
BP	GO:0016053	organic acid biosynthetic process	328/18903	9.96e-05	0.000688393	0.000209679	IDO1/KMO/KYNU	3
BP	GO:0006637	acyl-CoA metabolic process	94/18903	0.00036226	0.00234999	0.000715786	TDO2/ACAT1	2
BP	GO:0035383	thioester metabolic process	94/18903	0.00036226	0.00234999	0.000715786	TDO2/ACAT1	2
BP	GO:0043648	dicarboxylic acid metabolic process	95/18903	0.000369998	0.00234999	0.000715786	KMO/KYNU	2
BP	GO:0033865	nucleoside bisphosphate metabolic process	126/18903	0.000649718	0.00381709	0.00116265	TDO2/ACAT1	2
BP	GO:0033875	ribonucleoside bisphosphate metabolic process	126/18903	0.000649718	0.00381709	0.00116265	TDO2/ACAT1	2
BP	GO:0034032	purine nucleoside bisphosphate metabolic process	126/18903	0.000649718	0.00381709	0.00116265	TDO2/ACAT1	2
BP	GO:0072330	monocarboxylic acid biosynthetic process	218/18903	0.0019262	0.0110404	0.00336282	IDO1/KMO	2
BP	GO:0002676	regulation of chronic inflammatory response	10/18903	0.00317032	0.0169324	0.00515746	IDO1	1
BP	GO:0034356	NAD biosynthesis via nicotinamide riboside salvage pathway	10/18903	0.00317032	0.0169324	0.00515746	NAMPT	1
BP	GO:1902224	ketone body metabolic process	10/18903	0.00317032	0.0169324	0.00515746	ACAT1	1
BP	GO:0015937	coenzyme A biosynthetic process	11/18903	0.00348689	0.0170713	0.00519976	ACAT1	1
BP	GO:0033869	nucleoside bisphosphate catabolic process	11/18903	0.00348689	0.0170713	0.00519976	ACAT1	1
BP	GO:0034031	ribonucleoside bisphosphate catabolic process	11/18903	0.00348689	0.0170713	0.00519976	ACAT1	1
BP	GO:0034034	purine nucleoside bisphosphate catabolic process	11/18903	0.00348689	0.0170713	0.00519976	ACAT1	1
BP	GO:0002645	positive regulation of tolerance induction	12/18903	0.00380338	0.0178759	0.00544484	IDO1	1
BP	GO:0014049	positive regulation of glutamate secretion	12/18903	0.00380338	0.0178759	0.00544484	KMO	1
BP	GO:0002664	regulation of T cell tolerance induction	13/18903	0.00411978	0.0189833	0.00578215	IDO1	1
BP	GO:0006790	sulfur compound metabolic process	338/18903	0.00455968	0.0199429	0.00607442	TDO2/ACAT1	2
BP	GO:0032496	response to lipopolysaccharide	339/18903	0.00458609	0.0199429	0.00607442	IDO1/KMO	2
BP	GO:0002517	T cell tolerance induction	15/18903	0.00475234	0.0199429	0.00607442	IDO1	1
BP	GO:0042182	ketone catabolic process	15/18903	0.00475234	0.0199429	0.00607442	KYNU	1
BP	GO:0070234	positive regulation of T cell apoptotic process	15/18903	0.00475234	0.0199429	0.00607442	IDO1	1
BP	GO:0002237	response to molecule of bacterial origin	360/18903	0.00515735	0.0212627	0.00647645	IDO1/KMO	2
BP	GO:0001956	positive regulation of neurotransmitter secretion	18/18903	0.00570055	0.0212639	0.00647681	KMO	1
BP	GO:0002830	positive regulation of type 2 immune response	18/18903	0.00570055	0.0212639	0.00647681	IDO1	1
BP	GO:0006085	acetyl-CoA biosynthetic process	18/18903	0.00570055	0.0212639	0.00647681	ACAT1	1
BP	GO:0015936	coenzyme A metabolic process	18/18903	0.00570055	0.0212639	0.00647681	ACAT1	1
BP	GO:0051770	positive regulation of nitric-oxide synthase biosynthetic process	18/18903	0.00570055	0.0212639	0.00647681	NAMPT	1
BP	GO:0070230	positive regulation of lymphocyte apoptotic process	18/18903	0.00570055	0.0212639	0.00647681	IDO1	1
BP	GO:0002544	chronic inflammatory response	19/18903	0.00601645	0.0217518	0.0066254	IDO1	1
BP	GO:1901569	fatty acid derivative catabolic process	19/18903	0.00601645	0.0217518	0.0066254	ACAT1	1
BP	GO:0002643	regulation of tolerance induction	20/18903	0.00633227	0.0218836	0.00666554	IDO1	1
BP	GO:0014048	regulation of glutamate secretion	20/18903	0.00633227	0.0218836	0.00666554	KMO	1
BP	GO:0072234	metanephric nephron tubule development	20/18903	0.00633227	0.0218836	0.00666554	ACAT1	1
BP	GO:0009083	branched-chain amino acid catabolic process	21/18903	0.006648	0.0226417	0.00689648	ACAT1	1
BP	GO:0051767	nitric-oxide synthase biosynthetic process	22/18903	0.00696365	0.0230487	0.00702043	NAMPT	1
BP	GO:0051769	regulation of nitric-oxide synthase biosynthetic process	22/18903	0.00696365	0.0230487	0.00702043	NAMPT	1
BP	GO:0072170	metanephric tubule development	23/18903	0.00727922	0.0234331	0.00713752	ACAT1	1
BP	GO:0072243	metanephric nephron epithelium development	23/18903	0.00727922	0.0234331	0.00713752	ACAT1	1
BP	GO:0051590	positive regulation of neurotransmitter transport	24/18903	0.0075947	0.0237967	0.00724828	KMO	1
BP	GO:0070233	negative regulation of T cell apoptotic process	24/18903	0.0075947	0.0237967	0.00724828	IDO1	1
BP	GO:0009150	purine ribonucleotide metabolic process	447/18903	0.00785767	0.0241412	0.0073532	TDO2/ACAT1	2
BP	GO:0032693	negative regulation of interleukin-10 production	25/18903	0.0079101	0.0241412	0.0073532	IDO1	1
BP	GO:0014047	glutamate secretion	26/18903	0.00822542	0.024468	0.00745274	KMO	1
BP	GO:0051957	positive regulation of amino acid transport	26/18903	0.00822542	0.024468	0.00745274	KMO	1
BP	GO:0009259	ribonucleotide metabolic process	466/18903	0.00851755	0.0244763	0.00745525	TDO2/ACAT1	2
BP	GO:0009081	branched-chain amino acid metabolic process	27/18903	0.00854065	0.0244763	0.00745525	ACAT1	1
BP	GO:0072207	metanephric epithelium development	27/18903	0.00854065	0.0244763	0.00745525	ACAT1	1
BP	GO:0031667	response to nutrient levels	474/18903	0.00880278	0.0245361	0.00747349	ACAT1/KYNU	2
BP	GO:0019693	ribose phosphate metabolic process	475/18903	0.00883874	0.0245361	0.00747349	TDO2/ACAT1	2
BP	GO:0006163	purine nucleotide metabolic process	476/18903	0.00887477	0.0245361	0.00747349	TDO2/ACAT1	2
BP	GO:0009651	response to salt stress	30/18903	0.00948585	0.0256227	0.00780445	KMO	1
BP	GO:2000108	positive regulation of leukocyte apoptotic process	30/18903	0.00948585	0.0256227	0.00780445	IDO1	1
BP	GO:0002507	tolerance induction	31/18903	0.00980074	0.0261724	0.0079719	IDO1	1
BP	GO:0002828	regulation of type 2 immune response	33/18903	0.0104303	0.0272347	0.00829544	IDO1	1
BP	GO:0051968	positive regulation of synaptic transmission, glutamatergic	33/18903	0.0104303	0.0272347	0.00829544	KMO	1
BP	GO:0070229	negative regulation of lymphocyte apoptotic process	37/18903	0.0116884	0.0301843	0.00919387	IDO1	1
BP	GO:0042092	type 2 immune response	38/18903	0.0120027	0.0306591	0.00933849	IDO1	1
BP	GO:0044273	sulfur compound catabolic process	39/18903	0.0123169	0.0311234	0.00947993	ACAT1	1
BP	GO:0070232	regulation of T cell apoptotic process	41/18903	0.0129451	0.0323629	0.00985745	IDO1	1
BP	GO:0032735	positive regulation of interleukin-12 production	42/18903	0.0132591	0.0327989	0.00999026	IDO1	1
BP	GO:0009154	purine ribonucleotide catabolic process	43/18903	0.013573	0.0328831	0.0100159	ACAT1	1
BP	GO:0051954	positive regulation of amine transport	43/18903	0.013573	0.0328831	0.0100159	KMO	1
BP	GO:0035384	thioester biosynthetic process	45/18903	0.0142006	0.0333714	0.0101646	ACAT1	1
BP	GO:0051955	regulation of amino acid transport	45/18903	0.0142006	0.0333714	0.0101646	KMO	1
BP	GO:0071616	acyl-CoA biosynthetic process	45/18903	0.0142006	0.0333714	0.0101646	ACAT1	1
BP	GO:0006195	purine nucleotide catabolic process	48/18903	0.0151413	0.0348843	0.0106255	ACAT1	1
BP	GO:0032892	positive regulation of organic acid transport	48/18903	0.0151413	0.0348843	0.0106255	KMO	1
BP	GO:0009261	ribonucleotide catabolic process	49/18903	0.0154547	0.0352607	0.0107401	ACAT1	1
BP	GO:1903793	positive regulation of anion transport	51/18903	0.0160812	0.0363374	0.011068	KMO	1
BP	GO:0060612	adipose tissue development	52/18903	0.0163944	0.0366922	0.0111761	ACAT1	1
BP	GO:0072523	purine-containing compound catabolic process	54/18903	0.0170204	0.037734	0.0114934	ACAT1	1
BP	GO:2000107	negative regulation of leukocyte apoptotic process	55/18903	0.0173333	0.0380685	0.0115953	IDO1	1
BP	GO:0070231	T cell apoptotic process	57/18903	0.0179589	0.0390772	0.0119026	IDO1	1
BP	GO:0051289	protein homotetramerization	59/18903	0.0185841	0.0396491	0.0120768	TDO2	1
BP	GO:0033866	nucleoside bisphosphate biosynthetic process	60/18903	0.0188966	0.0396491	0.0120768	ACAT1	1
BP	GO:0034030	ribonucleoside bisphosphate biosynthetic process	60/18903	0.0188966	0.0396491	0.0120768	ACAT1	1
BP	GO:0034033	purine nucleoside bisphosphate biosynthetic process	60/18903	0.0188966	0.0396491	0.0120768	ACAT1	1
BP	GO:0070228	regulation of lymphocyte apoptotic process	62/18903	0.0195213	0.0405294	0.0123449	IDO1	1
BP	GO:0032615	interleukin-12 production	63/18903	0.0198336	0.0405294	0.0123449	IDO1	1
BP	GO:0032655	regulation of interleukin-12 production	63/18903	0.0198336	0.0405294	0.0123449	IDO1	1
BP	GO:0015800	acidic amino acid transport	65/18903	0.0204578	0.0407422	0.0124097	KMO	1
BP	GO:0032613	interleukin-10 production	65/18903	0.0204578	0.0407422	0.0124097	IDO1	1
BP	GO:0032653	regulation of interleukin-10 production	65/18903	0.0204578	0.0407422	0.0124097	IDO1	1
BP	GO:0042130	negative regulation of T cell proliferation	70/18903	0.0220169	0.0434787	0.0132432	IDO1	1
BP	GO:0032922	circadian regulation of gene expression	71/18903	0.0223285	0.0437266	0.0133187	NAMPT	1
BP	GO:0032890	regulation of organic acid transport	75/18903	0.0235739	0.0456342	0.0138998	KMO	1
BP	GO:0006635	fatty acid beta-oxidation	76/18903	0.0238851	0.0456342	0.0138998	ACAT1	1
BP	GO:0009166	nucleotide catabolic process	76/18903	0.0238851	0.0456342	0.0138998	ACAT1	1
BP	GO:0051966	regulation of synaptic transmission, glutamatergic	78/18903	0.0245072	0.0460735	0.0140336	KMO	1
BP	GO:1901568	fatty acid derivative metabolic process	78/18903	0.0245072	0.0460735	0.0140336	ACAT1	1
BP	GO:0070227	lymphocyte apoptotic process	80/18903	0.0251289	0.0468674	0.0142754	IDO1	1
BP	GO:0033555	multicellular organismal response to stress	81/18903	0.0254397	0.0470734	0.0143382	IDO1	1
BP	GO:1901292	nucleoside phosphate catabolic process	85/18903	0.0266818	0.0487936	0.0148621	ACAT1	1
BP	GO:0006970	response to osmotic stress	86/18903	0.0269922	0.0487936	0.0148621	KMO	1
BP	GO:0033273	response to vitamin	86/18903	0.0269922	0.0487936	0.0148621	KYNU	1
BP	GO:0050672	negative regulation of lymphocyte proliferation	87/18903	0.0273024	0.0489777	0.0149182	IDO1	1
BP	GO:0032945	negative regulation of mononuclear cell proliferation	88/18903	0.0276126	0.0491588	0.0149733	IDO1	1
BP	GO:0051262	protein tetramerization	90/18903	0.0282327	0.0493031	0.0150173	TDO2	1
BP	GO:0046928	regulation of neurotransmitter secretion	91/18903	0.0285426	0.0493031	0.0150173	KMO	1
BP	GO:1901216	positive regulation of neuron death	91/18903	0.0285426	0.0493031	0.0150173	KMO	1
BP	GO:0001656	metanephros development	92/18903	0.0288525	0.0493031	0.0150173	ACAT1	1
BP	GO:0006835	dicarboxylic acid transport	93/18903	0.0291622	0.0493031	0.0150173	KMO	1
BP	GO:0044070	regulation of anion transport	93/18903	0.0291622	0.0493031	0.0150173	KMO	1
BP	GO:2000106	regulation of leukocyte apoptotic process	93/18903	0.0291622	0.0493031	0.0150173	IDO1	1
MF	GO:0016702	oxidoreductase activity, acting on single donors with incorporation of molecular oxygen, incorporation of two atoms of oxygen	24/18432	2.43e-05	0.000396065	9.73e-05	TDO2/IDO1	2
MF	GO:0016701	oxidoreductase activity, acting on single donors with incorporation of molecular oxygen	25/18432	2.64e-05	0.000396065	9.73e-05	TDO2/IDO1	2
MF	GO:0051213	dioxygenase activity	93/18432	0.000372835	0.00372835	0.000915734	TDO2/IDO1	2
MF	GO:0020037	heme binding	139/18432	0.000830311	0.00571894	0.00140465	TDO2/IDO1	2
MF	GO:0046906	tetrapyrrole binding	149/18432	0.000953158	0.00571894	0.00140465	TDO2/IDO1	2
MF	GO:0030955	potassium ion binding	12/18432	0.00390043	0.0195021	0.00479	ACAT1	1
MF	GO:0050664	oxidoreductase activity, acting on NAD(P)H, oxygen as acceptor	16/18432	0.00519775	0.020707	0.00508592	KMO	1
MF	GO:0031420	alkali metal ion binding	17/18432	0.00552186	0.020707	0.00508592	ACAT1	1
MF	GO:0016408	C-acyltransferase activity	20/18432	0.00649366	0.0216455	0.00531645	ACAT1	1
MF	GO:0019825	oxygen binding	39/18432	0.0126301	0.0323804	0.00795307	TDO2	1
MF	GO:0071949	FAD binding	39/18432	0.0126301	0.0323804	0.00795307	KMO	1
MF	GO:0016709	oxidoreductase activity, acting on paired donors, with incorporation or reduction of molecular oxygen, NAD(P)H as one donor, and incorporation of one atom of oxygen	40/18432	0.0129521	0.0323804	0.00795307	KMO	1
MF	GO:0016763	pentosyltransferase activity	48/18432	0.0155257	0.0339257	0.00833263	NAMPT	1
MF	GO:0016597	amino acid binding	54/18432	0.0174522	0.0339257	0.00833263	TDO2	1
MF	GO:0030170	pyridoxal phosphate binding	55/18432	0.017773	0.0339257	0.00833263	KYNU	1
MF	GO:0070279	vitamin B6 binding	56/18432	0.0180937	0.0339257	0.00833263	KYNU	1
MF	GO:0016651	oxidoreductase activity, acting on NAD(P)H	87/18432	0.027992	0.0446998	0.0109789	KMO	1
MF	GO:0050660	flavin adenine dinucleotide binding	87/18432	0.027992	0.0446998	0.0109789	KMO	1
MF	GO:0016407	acetyltransferase activity	88/18432	0.0283099	0.0446998	0.0109789	ACAT1	1
