# Supplementary material for: Identification of tryptophan metabolism- and immune-related genes signature and prediction of immune infiltration landscape in bladder urothelial carcinoma
Source: Front Immunol. 2023 Oct 26;14:1283792. doi: 10.3389/fimmu.2023.1283792 (PMC10637370; doi:10.3389/fimmu.2023.1283792)
Supplement: Supplementary file 6 [file Table_5.xlsx]

## Sheet: Sheet1
ID	Description	BgRatio	pvalue	p.adjust	qvalue	geneID	Count
hsa00380	Tryptophan metabolism	42/8378	1.48e-11	2.22e-10	3.12e-11	TDO2/ACAT1/IDO1/KMO/KYNU	5
hsa01240	Biosynthesis of cofactors	153/8378	1.56e-06	1.17e-05	1.64e-06	TDO2/IDO1/KMO/KYNU	4
hsa00900	Terpenoid backbone biosynthesis	23/8378	0.0163639	0.0462233	0.00648748	ACAT1	1
hsa00650	Butanoate metabolism	27/8378	0.0191869	0.0462233	0.00648748	ACAT1	1
hsa00630	Glyoxylate and dicarboxylate metabolism	30/8378	0.0212997	0.0462233	0.00648748	ACAT1	1
hsa00760	Nicotinate and nicotinamide metabolism	36/8378	0.025514	0.0462233	0.00648748	NAMPT	1
hsa05143	African trypanosomiasis	37/8378	0.0262149	0.0462233	0.00648748	IDO1	1
hsa00071	Fatty acid degradation	43/8378	0.0304115	0.0462233	0.00648748	ACAT1	1
hsa04975	Fat digestion and absorption	43/8378	0.0304115	0.0462233	0.00648748	ACAT1	1
hsa00620	Pyruvate metabolism	47/8378	0.0332008	0.0462233	0.00648748	ACAT1	1
hsa00280	Valine, leucine and isoleucine degradation	48/8378	0.0338971	0.0462233	0.00648748	ACAT1	1
hsa01212	Fatty acid metabolism	57/8378	0.0401449	0.0501812	0.00704297	ACAT1	1
hsa00310	Lysine degradation	63/8378	0.0442914	0.0511055	0.0071727	ACAT1	1
hsa01200	Carbon metabolism	115/8378	0.0796065	0.0852927	0.0119709	ACAT1	1
hsa04621	NOD-like receptor signaling pathway	186/8378	0.126064	0.126064	0.0176931	NAMPT	1
